# Supplementary material for: Design, synthesis, and photophysics of bi- and tricyclic fused pyrazolines
Source: Royal Society of Chemistry journal article supplement (doi:10.1039/d0nj06287a), 2021-01-01
Supplement: d0nj06287a1.pdf [file d0nj06287a1.pdf]

# The New Journal of Chemistry

## Supporting information

### Design, synthesis, and photophysics of bi- and tricyclic fused pyrazolines

Aleksandra V. Popova,<sup>a</sup> Ali Kanaa,<sup>a</sup> Vladislava S. Vavilova,<sup>a</sup> Maria A. Mironova,<sup>a</sup> Pavel A.

Slepukhin<sup>a,b</sup> Enrico Benassi,<sup>c\*</sup> Nataliya P. Belskaya<sup>a,b\*</sup>

<sup>a</sup>Ural Federal University, 19 Mira Str., Yekaterinburg 620002, Russian Federation

<sup>b</sup>Postovsky Institute of Organic Synthesis, Ural Branch of Russian Academy of Science, 22 S. Kovalevskaya Str., Yekaterinburg, 620219, Russian Federation

<sup>c</sup>Shihezi University, 280 N 4th Rd, Shihezi, Xinjiang 832000, China, e-mail: enricobenassi3@gmail.com

## Table of contents

|                                                                                         |     |
|-----------------------------------------------------------------------------------------|-----|
| 1 Experimental section                                                                  | S2  |
| 2 <sup>1</sup> H and <sup>13</sup> C NMR spectra of compounds <b>2-4</b>                | S8  |
| 3 X-ray crystal structures of compounds Me-DPP <b>2h</b> , HMIs <b>4b</b> and <b>4d</b> | S34 |
| 4 Photophysical properties of Me-DPPs, Ph-DPPs and HMIs                                 | S36 |
| 5 Quantum Mechanical Calculation                                                        | S40 |
| 6 References                                                                            | S47 |
| 7 The Coordinates of compounds optimized at B3LYP/6-31G**level                          | S49 |

## 1. Experimental Section

**General.**  $^1\text{H}$  NMR and  $^{13}\text{C}$  NMR spectra were recorded at 400 MHz for  $^1\text{H}$  and 100 MHz for  $^{13}\text{C}$  spectrometer in  $\text{DMSO-}d_6$ ,  $\text{CDCl}_3$  or  $(\text{CD}_3)_2\text{CO-}d_6$ . Chemical shifts ( $\delta$  scale) are reported in parts per million (ppm) relative to TMS in  $^1\text{H}$  NMR and to the residual solvent signals in  $^{13}\text{C}$  NMR spectra. The  $^{13}\text{C}$  NMR signal patterns for compounds **6h,i** were analyzed by BB (broadband) and for all compounds by APT (attached proton test) and are described as follows: + for secondary or quaternary carbon atom (positive signal), - for primary or tertiary carbon atom (negative signal). The values of the coupling constants ( $J$ ) are given in Hertz (Hz). The signal splitting patterns are described as a singlet (s), doublet (d), triplet (t), quartet (q), sextet (sext), quintet (quin), multiplet (m), broad (br), doublet of doublets (dd), doublet of triplets (dt) or AA'XX' - spin system of *para*-substituted benzene with two different substituents. Mass spectra were recorded with a mass-spectrometer using the electron ionization (EI) technique (40-200 °C, 70 eV). The abbreviation  $[\text{M}]^+$  refers to the molecular ion. The IR spectra were obtained with a FT-IR ATR (attenuated total reflection, ZnSe) spectrometer in the 4000-500  $\text{cm}^{-1}$  region. Elemental analysis was carried out using a CHNS/O analyser. Melting points were determined using a microscopic melting point meter without correction. The reactions were monitored by analytical thin-layer chromatography (TLC) on aluminium-backed silica-gel plates (Sorbfil UV-254). Visualization of the components was accomplished by short wavelength UV-light (254 nm).

Microwave-heated reactions were carried out in an Anton Paar Monowave 300 microwave synthesis reactor in sealed microwave Pyrex vessels (4-30 mL). The temperature was controlled by external IR sensor. The pressure was monitored by an integrated hydraulic pressure sensor.

3-Chloropentane-2,4-dione and ethyl 2-chloro-3-oxobutanoate, were commercially available. Arylhydrazonoyl chlorides **3a,c-i** were synthesized via the Japp-Klingemann reaction as reported previously<sup>2-4</sup>. Commercially available chemicals and solvents were used without further purification. The products were purified by column chromatography on silica gel (0.035–0.070, 60Å) and re-crystallized from ethanol.

**General procedure for the synthesis of arylhydrazonoyl chlorides 1b,j,k.** An aqueous solution of the corresponding amine (10.0 mmol) in concentrated HCl (30 mmol) was cooled to 0-5 °C, and a solution of sodium nitrite (11.0 mmol) in 10 mL of water was added dropwise under stirring during 30 min to give aryl diazonium salt. 3-chloropentane-2,4-dione or ethyl 2-chloro-3-oxo-butanoate (10.0 mmol) and sodium acetate in ethanol was added dropwise at 0-5 °C under stirring. The reaction mixture was left overnight at the temperature of 0-5 °C, and the next day precipitate was filtered off.

**Ethyl 2-(2-(4-acetamidophenyl)hydrazono)-2-chloroacetate (1b).** Yellow powder (1.95 g, 69 %).  $R_f$  = 0.36 ( $\text{CHCl}_3/\text{Hex}/\text{Me}_2\text{CO}$ , 3:1:1), mp 200-205 °C. IR ( $\text{cm}^{-1}$ ): 3346, 3214 (N-H), 3065, 2993, 2976, 2934, 2904 (C-H), 1699, 1672 (C=O).  $^1\text{H}$  NMR (400 MHz,  $\text{DMSO-}d_6$ ):  $\delta$  1.30 (t,  $J$  = 7.1 Hz, 3H), 2.02 (s, 3H), 4.29 (q,  $J$  = 7.1 Hz, 2H), 7.29 and 7.54 (AA'XX',  $J$  = 8.9 Hz, 4H), 9.86 (s, 1H), 10.48 (s, 1H).  $^{13}\text{C}$  NMR (100 MHz,  $\text{DMSO-}d_6$ ):  $\delta$  (-) 14.1, (-) 23.8, (+) 62.0, (+) 112.8, (-) 114.8 (2C), (-) 120.0 (2C), (+) 134.4, (+)

138.1, (+) 159.4, (+) 167.8. Anal. Calcd for C<sub>12</sub>H<sub>14</sub>ClN<sub>3</sub>O<sub>3</sub>: C, 50.80; H, 4.97; N, 14.81; O, 16.92. Found: C, 50.7; H, 5.0; N, 14.6; O, 17.1. EIMS (70 eV) *m/z*: M-176 (100), M<sup>+</sup> 283 (9).

**Ethyl 2-chloro-2-(2-(4-cyanophenyl)hydrazono)acetate (1g).** Yellow powder (2.43 g, 97 %). *R<sub>f</sub>* = 0.58 (Hex/EtOAc, 1:1), mp 175-180 °C. IR (cm<sup>-1</sup>): 3249 (N-H), 3083, 3047, 2994, 2978, 2931, 2908 (C-H), 2219 (C≡N), 1701 (C=O). <sup>1</sup>H NMR (400 MHz, DMSO-*d*<sub>6</sub>): δ 1.38 (t, *J* = 7.1 Hz, 3H), 4.33 (q, *J* = 7.1 Hz, 2H), 7.50 and 7.62 (AA'XX', *J* = 8.8 Hz, 4H), 10.76 (s, 1H). <sup>13</sup>C NMR (100 MHz, DMSO-*d*<sub>6</sub>): δ (-) 14.0, (+) 62.5, (+) 103.7, (-) 114.8 (2C), (+) 116.7, (+) 119.2, (-) 133.7 (2C), (+) 146.4, (+) 158.9. Anal. Calcd for C<sub>11</sub>H<sub>10</sub>ClN<sub>3</sub>O<sub>2</sub>: C, 52.50; H, 4.01; N, 16.70; O, 12.71. Found: C, 52.3; H, 4.2; N, 16.5; O, 12.8. EIMS (70 eV) *m/z*: M-135 (100), M<sup>+</sup> 251 (12).

***N*-(4-Cyanophenyl)-2-oxopropanehydrazonoyl chloride (1k).** Yellow powder (2.01 g, 91 %). *R<sub>f</sub>* = 0.51 (CHCl<sub>3</sub>/Me<sub>2</sub>CO, 5:1), mp 195-200 °C. IR (cm<sup>-1</sup>): 3224 (NH), 3081, 2976 (C-H), 2224 (C≡N), 1688 (C=O). <sup>1</sup>H NMR (400 MHz, (CD<sub>3</sub>)<sub>2</sub>CO-*d*<sub>6</sub>): δ 2.58 (s, 3H), 7.63 and 7.77 (AA'XX', *J* = 8.8 Hz, 4H), 10.19 (s, 1H). <sup>13</sup>C NMR (100 MHz, DMSO-*d*<sub>6</sub>): δ (-) 25.4, (+) 104.0, (-) 115.1 (2C), (+) 119.2, (+) 125.4, (-) 133.7 (2C), (+) 146.2, (+) 188.1. Anal. Calcd for C<sub>10</sub>H<sub>8</sub>ClN<sub>3</sub>O: C, 54.19; H, 3.64; N, 18.96; O, 7.22. Found: C, 54.0; H, 3.7; N, 19.1; O, 7.0. EIMS (70 eV) *m/z*: M-178 (100), M<sup>+</sup> 221 (4).

**General procedure for the synthesis of Me-DPPs 2, Ph-DPPs 3 and HMIIs 4.** A solution of arylhydrazonoyl chloride **1a-k** (1.0 mmol), *N*-methylmaleimide **5**, *N*-phenylmaleimide **6** or norbornene **7** (1.0 mmol) and 0.14 mL (3.0 mmol) TEA in *m*-xylene (4.0 mL) was stirring at 150 °C for 15-180 min under microwave irradiation. The crude product was purified by column chromatography or re-crystallized from ethanol to give pyrazoline derivatives **2a-k**, **3a-e**, **4a-d**.

**Ethyl 1-(4-methoxyphenyl)-5-methyl-4,6-dioxo-1,3a,4,5,6,6a-hexahydropyrrolo[3,4-*c*]pyrazole-3-carboxylate (2a).** Green powder (258 mg, 78 %). *R<sub>f</sub>* = 0.63 (Hex/EtOAc, 1:1), mp 160-164 °C. IR (cm<sup>-1</sup>): 2989, 2958, 2910 (C-H), 1780, 1706 (C=O). <sup>1</sup>H NMR (400 MHz, DMSO-*d*<sub>6</sub>): δ 1.30 (t, *J* = 7.0 Hz, 3H), 2.87 (s, 3H), 3.75 (s, 3H), 4.27 (q, *J* = 6.7 Hz, 2H), 4.78 and 5.49 (AB, *J* = 11.2 Hz, 2H), 6.98 and 7.42 (AA'XX', *J* = 8.9 Hz, 4H). <sup>13</sup>C NMR (100 MHz, DMSO-*d*<sub>6</sub>): δ (-) 14.1, (-) 25.1, (-) 53.0, (-) 55.3, (+) 60.7, (-) 66.5, (-) 114.4 (2C), (-) 116.3 (2C), (+) 133.6, (+) 136.0, (+) 155.1, (+) 160.5, (+) 171.6, (+) 172.5. Anal. Calcd for C<sub>16</sub>H<sub>17</sub>N<sub>3</sub>O<sub>5</sub>: C, 58.00; H, 5.17; N, 12.68. Found: C, 58.2; H, 5.0; N, 12.7. EIMS (70 eV) *m/z*: M<sup>+</sup> 331 (100). HRMS (ESI/Q-TOF): *m/z* calcd for C<sub>16</sub>H<sub>17</sub>N<sub>3</sub>O<sub>5</sub>+H<sup>+</sup>: 332.1241 [M+H]<sup>+</sup> found 332.1250.

**Ethyl 1-(4-acetamidophenyl)-5-methyl-4,6-dioxo-1,3a,4,5,6,6a-hexahydropyrrolo[3,4-*c*]pyrazole-3-carboxylate (2b).** Yellow powder (204 mg, 57 %). *R<sub>f</sub>* = 0.21 (CHCl<sub>3</sub>/Me<sub>2</sub>CO/Hex, 3:1:1), mp 250-255 °C. IR (cm<sup>-1</sup>): 3347 (N-H), 3000, 2973, 2903 (C-H), 1785, 1697, 1682 (C=O). <sup>1</sup>H NMR (400 MHz, DMSO-*d*<sub>6</sub>): δ 1.37 (t, *J* = 7.1 Hz, 3H), 2.03 (s, 3H), 2.93 (s, 3H), 4.30 (q, *J* = 7.0 Hz, 2H), 4.76 and 5.45 (AB, *J* = 11.2 Hz, 2H), 7.43 and 7.56 (AA'XX', *J* = 9.0 Hz, 4H), 9.72 (s, 1H). <sup>13</sup>C NMR (100 MHz, DMSO-*d*<sub>6</sub>): (-) 14.1, (-) 23.8, (-) 25.2, (-) 53.0, (+) 60.7, (-) 66.1, (-) 115.1 (2C), (-) 119.9 (2C), (+) 134.1, (+) 134.4, (+) 137.6, (+) 160.5, (+) 167.9, (+) 171.5, (+) 172.4. Anal. Calcd for C<sub>17</sub>H<sub>18</sub>N<sub>4</sub>O<sub>5</sub>: C, 56.98; H, 5.06; N, 15.63. Found: C, 57.1; H, 5.0; N, 15.5. EIMS (70 eV) *m/z*: M-315 (100), M<sup>+</sup> 358 (36).

**Ethyl 5-methyl-4,6-dioxo-1-(*p*-tolyl)-1,3a,4,5,6,6a-hexahydropyrrolo[3,4-*c*]pyrazole-3-carboxylate (2c).** Beige powder (249 mg, 79 %).  $R_f = 0.30$  (Hex/Me<sub>2</sub>CO, 3:2), 0.32 (CHCl<sub>3</sub>/Me<sub>2</sub>CO, 5:1), mp 259-263 °C. IR (cm<sup>-1</sup>): 2988, 2954 (C-H), 1787, 1709 (C=O). <sup>1</sup>H NMR (400 MHz, DMSO-*d*<sub>6</sub>): δ 1.30 (t,  $J = 7.1$ , 3H), 2.28 (s, 3H), 2.87 (s, 3H), 4.28 (qd,  $J = 7.0$ , 1.1 Hz, 2H), 4.79 and 5.51 (AB,  $J = 11.2$  Hz, 2H), 7.19 and 7.38 (AA'XX',  $J = 8.6$  Hz, 4H). <sup>13</sup>C NMR (100 MHz, DMSO-*d*<sub>6</sub>): δ (-) 14.1, (-) 20.2, (-) 25.1, (-) 53.0, (+) 60.7, (-) 66.1, (-) 114.9 (2C), (-) 129.5 (2C), (+) 131.4, (+) 134.3, (+) 140.0, (+) 160.5, (+) 171.5, (+) 172.4. Anal. Calcd for C<sub>16</sub>H<sub>17</sub>N<sub>3</sub>O<sub>4</sub>: C, 60.94; H, 5.43; N, 13.33. Found: C, 60.7; H, 5.5; N, 13.4. EIMS (70 eV)  $m/z$ : M<sup>+</sup> 315 (100). HRMS (ESI/Q-TOF):  $m/z$  calcd for C<sub>16</sub>H<sub>17</sub>N<sub>3</sub>O<sub>4</sub>+H<sup>+</sup>: 316.1292 [M+H]<sup>+</sup> found 316.1301.

**Ethyl 5-methyl-4,6-dioxo-1-phenyl-1,3a,4,5,6,6a-hexahydropyrrolo[3,4-*c*]pyrazole-3-carboxylate (2d).** Light yellow powder (241 mg, 80 %).  $R_f = 0.34$  (CHCl<sub>3</sub>/Me<sub>2</sub>CO, 5:1), 0.55 (Hex/EtOAc, 1:2), 0.53 (Hex/EtOAc, 2:3), mp 148-149 °C. IR (cm<sup>-1</sup>): 2984, 2969 (C-H), 1789, 1704 (C=O). <sup>1</sup>H NMR (400 MHz, DMSO-*d*<sub>6</sub>): δ 1.39 (t,  $J = 7.1$  Hz, 3H), 2.94 (s, 3H), 4.32 (qd,  $J = 7.0$ , 1.0 Hz, 2H), 4.78 and 5.47 (AB,  $J = 11.2$  Hz, 2H), 7.02 (t,  $J = 7.3$  Hz, 1H), 7.33 (dd,  $J = 8.6$ , 7.5 Hz, 2H), 7.53-7.55 (m, 2H). <sup>13</sup>C NMR (100 MHz, DMSO-*d*<sub>6</sub>): δ (-) 14.1, (-) 25.2, (-) 53.1, (+) 60.8, (-) 65.9, (-) 114.7 (2C), (-) 122.3, (-) 129.1 (2C), (+) 134.9, (+) 142.2, (+) 160.4, (+) 171.4, (+) 172.4. Anal. Calcd for C<sub>15</sub>H<sub>15</sub>N<sub>3</sub>O<sub>4</sub>: C, 59.80; H, 5.02; N, 13.95. Found: C, 59.7; H, 5.2; N, 13.7. EIMS (70 eV)  $m/z$ : M<sup>+</sup> 301 (100). HRMS (ESI/Q-TOF):  $m/z$  calcd for C<sub>15</sub>H<sub>15</sub>N<sub>3</sub>O<sub>4</sub>+H<sup>+</sup>: 302.1135 [M+H]<sup>+</sup> found 302.1141.

**Ethyl 1-(4-chlorophenyl)-5-methyl-4,6-dioxo-1,3a,4,5,6,6a-hexahydropyrrolo[3,4-*c*]pyrazole-3-carboxylate (2e).** White powder (258 mg, 77 %).  $R_f = 0.50$  (Hex/EtOAc, 1:1), mp 163-167 °C. IR (cm<sup>-1</sup>): 2995, 2948, 2909 (C-H), 1789, 1711 (C=O). <sup>1</sup>H NMR (400 MHz, DMSO-*d*<sub>6</sub>): δ 1.37 (t,  $J = 7.1$  Hz, 3H), 2.92 (s, 3H), 4.31 (q,  $J = 7.0$  Hz, 2H), 4.79 and 5.50 (AB,  $J = 11.1$  Hz, 2H), 7.34 and 7.51 (AA'XX',  $J = 9.0$  Hz, 4H). <sup>13</sup>C NMR (100 MHz, DMSO-*d*<sub>6</sub>): δ (-) 14.1, (-) 25.2, (-) 53.3, (+) 60.9, (-) 65.8, (-) 116.3 (2C), (+) 126.0, (-) 128.9 (2C), (+) 135.7, (+) 141.1, (+) 160.3, (+) 171.3, (+) 172.3. Anal. Calcd for C<sub>15</sub>H<sub>14</sub>ClN<sub>3</sub>O<sub>4</sub>: C, 53.66; H, 4.20; N, 12.52. Found: C, 53.9; H, 4.1; N, 12.5. EIMS (70 eV)  $m/z$ : M-249 (100), M<sup>+</sup> 335 (49).

**Ethyl 5-methyl-4,6-dioxo-1-(4-(trifluoromethyl)phenyl)-1,3a,4,5,6,6a-hexahydropyrrolo[3,4-*c*]pyrazole-3-carboxylate (2f).** Beige powder (260 mg, 71 %).  $R_f = 0.50$  (CHCl<sub>3</sub>/EtOAc, 10:1), mp 215-216 °C. IR (cm<sup>-1</sup>): 2992, 2971, 2945, 2926, 2909 (C-H), 1789, 1715 (C=O). <sup>1</sup>H NMR (400 MHz, DMSO-*d*<sub>6</sub>): δ 1.31 (t,  $J = 7.1$  Hz, 3H), 2.87 (s, 3H), 4.31 (qd,  $J = 7.0$ , 1.2 Hz, 2H), 4.84 and 5.64 (AB,  $J = 11.0$  Hz, 2H), 7.62 and 7.74 (AA'XX',  $J = 8.8$  Hz, 4H). <sup>13</sup>C NMR (100 MHz, DMSO-*d*<sub>6</sub>): δ 14.1, 25.2, 53.4, 61.1, 65.3, 114.7 (2C), 122.0 (q,  $J = 32.0$  Hz), 124.5 (q,  $J = 271.0$  Hz), 126.4 (q,  $J = 3.7$  Hz, 2C), 137.2, 145.1, 160.2, 171.0, 172.2. Anal. Calcd for C<sub>16</sub>H<sub>14</sub>F<sub>3</sub>N<sub>3</sub>O<sub>4</sub>: C, 52.04; H, 3.82; N, 11.38. Found: C, 51.8; H, 3.9; N, 11.1. EIMS (70 eV)  $m/z$ : M<sup>+</sup> 369 (100).

**Ethyl 1-(4-cyanophenyl)-5-methyl-4,6-dioxo-1,3a,4,5,6,6a-hexahydropyrrolo[3,4-*c*]pyrazole-3-carboxylate (2g).** Beige powder (251 mg, 78 %).  $R_f = 0.53$  (CHCl<sub>3</sub>/Me<sub>2</sub>CO, 5:1), 0.56 (Hex/EtOAc, 1:1), mp 215-216 °C. IR (cm<sup>-1</sup>): 2985, 2949 (C-H), 2217 (C≡N), 1793, 1714 (C=O). <sup>1</sup>H NMR (400 MHz, DMSO-*d*<sub>6</sub>): δ 1.31 (t,  $J = 7.1$  Hz, 3H), 2.86 (s, 3H), 4.34 (qd,  $J = 7.1$ , 2.0 Hz, 2H), 4.83 and 5.65 (AB,  $J = 10.9$  Hz,

2H), 7.57 and 7.81 (AA'XX',  $J = 8.9$  Hz, 4H).  $^{13}\text{C}$  NMR (100 MHz, DMSO- $d_6$ ):  $\delta$  (-) 14.0, (-) 25.2, (-) 53.5, (+) 61.2, (-) 65.0, (+) 103.5, (-) 115.0 (2C), (+) 119.1, (-) 133.4 (2C), (+) 138.1, (+) 145.5, (+) 160.0, (+) 170.8, (+) 172.1. Anal. Calcd for  $\text{C}_{16}\text{H}_{14}\text{N}_4\text{O}_4$ : C, 58.89; H, 4.32; N, 17.17. Found: C, 58.8; H, 4.3; N, 17.1. EIMS (70 eV)  $m/z$ :  $\text{M}^+$  326 (100).

**Ethyl 1-(2-chlorophenyl)-5-methyl-4,6-dioxo-1,3a,4,5,6,6a-hexahydropyrrolo[3,4-c]pyrazole-3-carboxylate (2h).** White powder (228 mg, 68 %).  $R_f = 0.59$  (Hex/EtOAc, 1:1), mp 165-170 °C. IR ( $\text{cm}^{-1}$ ): 2991, 2964 (C-H), 1779, 1729, 1702 (C=O).  $^1\text{H}$  NMR (400 MHz, DMSO- $d_6$ ):  $\delta$  1.28 (t,  $J = 7.1$  Hz, 3H), 2.81 (s, 3H), 4.21-4.29 (m, 2H), 4.78 and 5.69 (AB,  $J = 10.9$  Hz, 2H), 7.28-7.33 (m, 1H), 7.37-7.39 (m, 2H), 7.54 (d,  $J = 7.8$  Hz, 1H).  $^{13}\text{C}$  NMR (100 MHz, DMSO- $d_6$ ):  $\delta$  (-) 14.1, (-) 25.0, (-) 52.9, (+) 60.8, (-) 65.8, (-) 126.3, (+) 127.1, (-) 127.8, (-) 128.0, (-) 130.3, (+) 136.1, (+) 139.1, (+) 160.3, (+) 171.6, (+) 171.7. Anal. Calcd for  $\text{C}_{15}\text{H}_{14}\text{ClN}_3\text{O}_4$ : C, 53.66; H, 4.20; N, 12.52. Found: C, 53.7; H, 4.1; N, 12.4. EIMS (70 eV)  $m/z$ :  $\text{M}^+$  335 (100).

**3-Acetyl-5-methyl-1-(*p*-tolyl)-3a,6a-dihydropyrrolo[3,4-c]pyrazole-4,6(1H,5H)-dione (2i).** Bright yellow crystals (215 mg, 75 %).  $R_f = 0.38$  (Hex/EtOAc, 1:1), mp 167-169 °C.  $^1\text{H}$  NMR (400 MHz, DMSO- $d_6$ ):  $\delta$  2.28 (s, 3H), 2.41 (s, 3H), 2.84 (s, 3H), 4.76 and 5.53 (AB  $J = 11.1$  Hz, 2H), 7.20 and 7.45 (AA'XX',  $J = 8.4$  Hz, 4H).  $^{13}\text{C}$  NMR (100 MHz, DMSO- $d_6$ ):  $\delta$  20.2, 25.1, 25.8, 51.7, 66.3, 115.1 (2C), 129.5 (2C), 131.7, 139.6, 141.8, 171.3, 172.2, 190.6. Anal. Calcd for  $\text{C}_{15}\text{H}_{15}\text{N}_3\text{O}_3$ : C, 63.15; H, 5.30; N, 14.73. Found: C, 62.9; H, 5.4; N, 14.6. EIMS (70 eV)  $m/z$ : M-242 (100),  $\text{M}^+$  285 (80.8).

**3-Acetyl-5-methyl-1-phenyl-3a,6a-dihydropyrrolo[3,4-c]pyrazole-4,6(1H,5H)-dione (2j).** Yellow crystals (245 mg, 91%).  $R_f = 0.40$  (Hex/EtOAc, 1:1), mp 209-211 °C.  $^1\text{H}$  NMR (400 MHz, DMSO- $d_6$ ):  $\delta$  2.42 (s, 3H), 2.84 (s, 3H), 4.77 and 5.57 (AB,  $J = 11.0$  Hz, 2H), 7.07 (t,  $J = 7.3$  Hz, 1H), 7.40 (t,  $J = 7.9$ , 2H), 7.55 (d,  $J = 8.0$ , 2H).  $^{13}\text{C}$  NMR (100 MHz, DMSO- $d_6$ ):  $\delta$  25.2, 25.8, 51.8, 66.1, 115.0 (2C), 122.6, 129.1 (2C), 141.9, 142.4, 171.2, 172.3, 190.8. Anal. Calcd for  $\text{C}_{14}\text{H}_{13}\text{N}_3\text{O}_3$ : C, 61.99; H, 4.83; N, 15.49. Found: C, 62.1; H, 4.9; N, 15.4. EIMS (70 eV)  $m/z$ : M-100 (100),  $\text{M}^+$  271 (72.2).

**4-(3-Acetyl-5-methyl-4,6-dioxo-4,5,6,6a-tetrahydropyrrolo[3,4-c]pyrazol-1(3aH)-yl)benzotrile (2k).** Beige powder (260 mg, 88 %).  $R_f = 0.43$  ( $\text{CHCl}_3/\text{Me}_2\text{CO}$ , 5:1), mp 226-227 °C. IR ( $\text{cm}^{-1}$ ): 2985, 2961, 2926, 2858 (C-H), 2215 ( $\text{C}\equiv\text{N}$ ), 1784, 1698, 1679 (C=O).  $^1\text{H}$  NMR (400 MHz, DMSO- $d_6$ ):  $\delta$  2.46 (s, 3H), 2.85 (s, 3H), 4.81 and 5.67 (AB,  $J = 10.8$  Hz, 2H), 7.66 and 7.85 (AA'XX',  $J = 8.8$  Hz, 4H).  $^{13}\text{C}$  NMR (100 MHz, DMSO- $d_6$ ):  $\delta$  (-) 25.2, (-) 26.1, (-) 52.2, (-) 65.3, (+) 103.7, (-) 115.2 (2C), (+) 119.1, (-) 133.5 (2C), (+) 144.8, (+) 145.3, (+) 170.7, (+) 172.1, (+) 191.1. Anal. Calcd for  $\text{C}_{15}\text{H}_{12}\text{N}_4\text{O}_3$ : C, 60.81; H, 4.08; N, 18.91. Found: C, 61.0; H, 4.2; N, 18.4. EIMS (70 eV)  $m/z$ : M-253 (100),  $\text{M}^+$  296 (30).

**Ethyl 4,6-dioxo-5-phenyl-1-(*p*-tolyl)-1,3a,4,5,6,6a-hexahydropyrrolo[3,4-c]pyrazole-3-carboxylate (3a).** Pale beige powder (253 mg, 66 %).  $R_f = 0.28$  ( $\text{CHCl}_3/\text{Me}_2\text{CO}$ , 5:1), mp 232-233 °C.  $^1\text{H}$  NMR (400 MHz, DMSO- $d_6$ ):  $\delta$  1.31 (t,  $J = 7.1$  Hz, 3H), 2.29 (s, 3H), 4.30 (q,  $J = 6.8$  Hz, 2H), 4.97 and 5.68 (AB,  $J = 11.4$  Hz, 2H), 7.21 (d,  $J = 7.8$  Hz, 2H), 7.32 (d,  $J = 7.8$  Hz, 2H), 7.37-7.57 (m, 5H).  $^{13}\text{C}$  NMR (100 MHz, DMSO- $d_6$ ):  $\delta$  14.1, 20.2, 53.3, 60.8, 66.4, 114.9 (2C), 127.1 (2C), 128.7 (2C), 128.9, 129.5 (2C), 131.4, 131.9, 134.4,

140.1, 160.5, 170.6, 171.6. Anal. Calcd for C<sub>21</sub>H<sub>19</sub>N<sub>3</sub>O<sub>4</sub>: C, 66.83; H, 5.07; N, 11.13. Found: C, 66.9; H, 4.9; N, 11.3. (70 eV) *m/z*: M<sup>+</sup> 377 (100). HRMS (ESI/Q-TOF): *m/z* calcd for C<sub>21</sub>H<sub>19</sub>N<sub>3</sub>O<sub>4</sub>+H<sup>+</sup>: 378.1448 [M+H]<sup>+</sup> found 378.1459.

**Ethyl 1-(4-cyanophenyl)-4,6-dioxo-5-phenyl-1,3a,4,5,6,6a-hexahydropyrrolo[3,4-*c*]pyrazole-3-carboxylate (3b).** Beige powder (268 mg, 69 %). *R<sub>f</sub>* = 0.26 (CHCl<sub>3</sub>/Me<sub>2</sub>CO, 5:1), mp 209-210 °C. IR (cm<sup>-1</sup>): 3070, 3054, 2984, 2975, 2956, 2927, 2874, 2861 (C-H), 2216 (C≡N), 1791, 1721 (C=O). <sup>1</sup>H NMR (400 MHz, DMSO-*d*<sub>6</sub>): δ 1.39 (t, *J* = 7.1 Hz, 3H), 4.32 (qd, *J* = 7.1, 1.0 Hz, 2H), 4.97 and 5.76 (AB, *J* = 11.2 Hz, 2H), 7.31 (d, *J* = 7.3 Hz, 2H), 7.42-7.50 (m, 3H), 7.67 and 7.73 (AA'XX', *J* = 8.9 Hz, 4H). <sup>13</sup>C NMR (100 MHz, DMSO-*d*<sub>6</sub>): δ (-) 14.1, (-) 53.7, (+) 61.2, (-) 65.4, (+) 103.5, (-) 115.1 (2C), (+) 119.1, (-) 127.1 (2C), (-) 128.8 (2C), (-) 128.9, (+) 131.9, (-) 133.5 (2C), (+) 138.2, (+) 145.6, (+) 160.1, (+) 169.9, (+) 171.3. Anal. Calcd for C<sub>21</sub>H<sub>16</sub>N<sub>4</sub>O<sub>4</sub>: C, 64.94; H, 4.15; N, 14.43. Found: C, 65.0; H, 4.3; N, 14.2. EIMS (70 eV) *m/z*: M<sup>+</sup> 388 (100). HRMS (ESI/Q-TOF): *m/z* calcd for C<sub>21</sub>H<sub>16</sub>N<sub>4</sub>O<sub>4</sub>+H<sup>+</sup>: 389.1244 [M+H]<sup>+</sup> found 389.1244.

**3-Acetyl-5-phenyl-1-(*p*-tolyl)-3a,6a-dihydropyrrolo[3,4-*c*]pyrazole-4,6(1*H*,5*H*)-dione (3c).** Pale yellow powder (245 mg, 70 %). *R<sub>f</sub>* = 0.42 (Hex/EtOAc, 1:1), mp 247-249 °C. <sup>1</sup>H NMR (400 MHz, DMSO-*d*<sub>6</sub>): δ 2.29 (s, 3H), 2.47 (s, 3H), 4.94 and 5.70 (AB, *J* = 11.3 Hz, 2H), 7.22 (d, *J* = 8.4 Hz, 2H), 7.30 (d, *J* = 8.4 Hz, 2H), 7.40-7.55 (m, 5H). <sup>13</sup>C NMR (100 MHz, DMSO-*d*<sub>6</sub>): δ 20.2, 25.9, 52.0, 66.7, 115.2 (2C), 127.1 (2C), 128.7, 128.9, 129.5 (2C), 131.8 (2C), 132.0, 139.8, 142.0, 170.4, 171.5, 190.7. Anal. Calcd for C<sub>20</sub>H<sub>17</sub>N<sub>3</sub>O<sub>3</sub>: C, 69.15; H, 4.93; N, 12.10. Found: C, 69.0; H, 5.1; N, 12.2. EIMS (70 eV) *m/z*: M-162 (100), M<sup>+</sup> 347 (72.7).

**3-Acetyl-1,5-diphenyl-3a,6a-dihydropyrrolo[3,4-*c*]pyrazole-4,6(1*H*,5*H*)-dione (3d).** Light yellow powder (300 mg, 90 %). *R<sub>f</sub>* = 0.43 (Hex/EtOAc, 1:1), mp 221-222 °C. <sup>1</sup>H NMR (400 MHz, CDCl<sub>3</sub>): δ 2.60 (s, 3H), 5.06 and 5.51 (AB, *J* = 11.3 Hz, 2H), 7.16 (t, *J* = 7.3 Hz, 1H), 7.31 (d, *J* = 7.7 Hz, 2H), 7.41-7.50 (m, 5H), 7.71 (d, *J* = 8.1 Hz, 2H). <sup>13</sup>C NMR (100 MHz, DMSO-*d*<sub>6</sub>): δ 26.0, 52.0, 66.5, 115.1 (2C), 122.6, 127.1 (2C), 128.7, 128.9 (2C), 129.1 (2C), 132.0, 142.0, 142.6, 170.3, 171.5, 190.8. Anal. Calcd for C<sub>19</sub>H<sub>15</sub>N<sub>3</sub>O<sub>3</sub>: C, 68.46; H, 4.54; N, 12.61. Found: C, 68.6; H, 4.3; N, 12.7. EIMS (70 eV) *m/z*: M-162 (100), M<sup>+</sup> 333 (63.0).

**4-(3-Acetyl-4,6-dioxo-5-phenyl-4,5,6,6a-tetrahydropyrrolo[3,4-*c*]pyrazol-1(3a*H*)-yl)benzotrile (3e).** Light yellow powder (260 mg, 73 %). *R<sub>f</sub>* = 0.26 (Hex/EtOAc, 1:1), mp 245-247 °C. <sup>1</sup>H NMR (400 MHz, DMSO-*d*<sub>6</sub>): δ 2.48 (s, 3H), 4.96 (d, *J* = 11.0 Hz, 1H), 5.81 (d, *J* = 11.0 Hz, 1H), 7.24-7.54 (m, 5H), 7.69 and 7.86 (AA'XX', *J* = 8.4 Hz, 4H). <sup>13</sup>C NMR (100 MHz, DMSO-*d*<sub>6</sub>): δ 26.2, 52.5, 66.7, 103.8, 115.3 (2C), 119.2, 127.1 (2C), 128.7, 128.9 (2C), 131.9, 133.5 (2C), 145.0, 145.4, 169.8, 171.3, 191.1. Anal. Calcd for C<sub>20</sub>H<sub>14</sub>N<sub>4</sub>O<sub>3</sub>: C, 67.03; H, 3.94; N, 15.63. Found: C, 67.2; H, 4.1; N, 15.7. EIMS (70 eV) *m/z*: M-162 (100), M<sup>+</sup> 358 (74.4).

**Ethyl 1-(*p*-tolyl)-3a,4,5,6,7,7a-hexahydro-1*H*-4,7-methanoindazole-3-carboxylate (4a).** Light yellow crystals (200 mg, 66 %). *R<sub>f</sub>* = 0.27 (CHCl<sub>3</sub>/Me<sub>2</sub>CO, 5:1), mp 41-42 °C. <sup>1</sup>H NMR (400 MHz, CDCl<sub>3</sub>): δ 1.20 (d, *J* = 10.5 Hz, 1H), 1.30-1.42 (m, 6H), 1.55-1.64 (m, 2H), 2.29 (s, 3H), 2.68 (br s, 1H), 2.78 (s, 1H), 3.41

and 4.21 (AB,  $J = 10.0$  Hz, 2H), 7.08-7.12 (m, 4H),  $^{13}\text{C}$  NMR (100 MHz,  $\text{DCCl}_3$ ):  $\delta$  14.5, 20.7, 24.7, 27.7, 33.2, 40.9, 41.6, 54.2, 60.9, 69.4, 114.0 (2C), 129.7 (2C), 130.5, 140.1, 140.3, 163.2. Anal. Calcd for  $\text{C}_{18}\text{H}_{22}\text{N}_2\text{O}_2$ : C, 72.46; H, 7.43; N, 9.39. Found: C, 72.7; H, 7.3; N, 9.2. EIMS (70 eV)  $m/z$ :  $\text{M}^+$  298 (100).

**Ethyl 1-(4-cyanophenyl)-3a,4,5,6,7,7a-hexahydro-1H-4,7-methanoindazole-3-carboxylate (4b).** Yellow powder (229 mg, 74 %).  $R_f = 0.43$  ( $\text{CHCl}_3/\text{Me}_2\text{CO}$ , 5:1), mp 115-116 °C. IR ( $\text{cm}^{-1}$ ): 2954, 2928, 2874, 2852 (C-H), 2209 ( $\text{C}\equiv\text{N}$ ), 1698 (C=O).  $^1\text{H}$  NMR (400 MHz,  $\text{CDCl}_3$ ): 1.25-1.32 (m, 1H), 1.33-1.49 (m, 6H), 1.60-1.74 (m, 2H), 2.74 (s, 1H), 2.79 (s, 1H), 3.49 (d,  $J = 9.6$  Hz, 1H), 4.23 (d,  $J = 9.6$  Hz, 1H), 4.31-4.45 (m, 2H),  $\delta$  7.24 and 7.58 (AA'XX',  $J = 8.5$ , 4H).  $^{13}\text{C}$  NMR (100 MHz,  $\text{DCCl}_3$ ):  $\delta$  14.5, 24.7, 27.7, 33.2, 40.7, 41.3, 54.9, 61.5, 68.7, 103.1, 113.9 (2C), 119.8, 133.6 (2C), 144.7, 145.7, 162.5. Anal. Calcd for  $\text{C}_{18}\text{H}_{19}\text{N}_3\text{O}_2$ : C, 69.88; H, 6.19; N, 13.58. Found: C, 69.9; H, 6.3; N, 13.7. EIMS (70 eV)  $m/z$ :  $\text{M}^+$  309 (100).

**1-(1-*p*-Tolyl-3a,4,5,6,7,7a-hexahydro-1H-4,7-methanoindazol-3-yl)ethan-1-one (4c).** Orange powder (238 mg, 89 %).  $R_f = 0.58$  (Hex/EtOAc, 1:1), mp 78-80 °C.  $^1\text{H}$  NMR (400 MHz,  $\text{DMSO-}d_6$ ):  $\delta$  1.10-1.15 (m, 2H), 1.30-1.38 (m, 2H), 1.46-1.55 (m, 2H), 2.26 (s, 3H), 2.34 (s, 3H), 2.49 (s, 1H), 2.67 (s, 1H), 3.34 (s, 1H), 4.36 (d,  $J = 9.9$ , 1H), 7.15 (s, 4H).  $^{13}\text{C}$  NMR (100 MHz,  $\text{DMSO-}d_6$ ):  $\delta$  20.2, 23.8, 25.3, 26.9, 32.5, 41.0, 51.8, 68.9, 113.9 (2C), 129.7 (2C), 130.1, 139.4, 148.4, 192.3. Anal. Calcd for  $\text{C}_{17}\text{H}_{20}\text{N}_2\text{O}$ : C, 76.09; H, 7.51; N, 10.44. Found: C, 76.2; H, 7.4; N, 10.6. EIMS (70 eV)  $m/z$ :  $\text{M}^-$  43 (100),  $\text{M}^+$  268 (92.8).

**1-(1-Phenyl-3a,4,5,6,7,7a-hexahydro-1H-4,7-methanoindazol-3-yl)ethan-1-one (4d).** Dark golden crystals (205 mg, 81 %).  $R_f = 0.68$  (Hex/EtOAc, 1:1), mp 119-121 °C.  $^1\text{H}$  NMR (400 MHz,  $\text{CDCl}_3$ ):  $\delta$  1.18 (d,  $J = 10.5$  Hz, 1H), 1.31 (t,  $J = 9.9$  Hz, 2H), 1.41 (t,  $J = 9.0$  Hz, 1H), 1.51-1.67 (m, 2H), 2.45 (s, 3H), 2.67 (br s, 1H), 2.79 (s, 1H), 3.40 and 4.22 (AB,  $J = 9.8$  Hz, 2H), 6.97 (t,  $J = 7.3$  Hz, 1H), 7.56 (d,  $J = 7.9$  Hz, 2H), 7.32 (t,  $J = 7.9$  Hz, 2H).  $^{13}\text{C}$  NMR (100 MHz,  $\text{DCCl}_3$ ):  $\delta$  24.6, 25.7, 27.7, 33.1, 40.4, 41.6, 52.7, 69.7, 114.1 (2C), 121.5, 129.4 (2C), 142.2, 149.4, 194.0. Anal. Calcd for  $\text{C}_{16}\text{H}_{18}\text{N}_2\text{O}$ : C, 75.56; H, 7.13; N, 11.01. Found: C, 75.7; H, 7.0; N, 11.2. EIMS (70 eV)  $m/z$ :  $\text{M}^-$  43 (100),  $\text{M}^+$  254 (80).

**4-(3-acetyl-3a,4,5,6,7,7a-hexahydro-1H-4,7-methanoindazol-1-yl)benzotrile (4e).** Golden crystals (210 mg, 75 %).  $R_f = 0.62$  (Hex/EtOAc, 1:1), mp 149-150 °C.  $^1\text{H}$  NMR (400 MHz,  $\text{CDCl}_3$ ):  $\delta$  1.20-1.26 (m, 2H), 1.32 (t,  $J = 8.9$  Hz, 1H), 1.42 (t,  $J = 8.0$  Hz, 1H), 2.45 (s, 3H), 2.68 (br s, 1H), 2.75 (br s, 1H), 3.42 and 4.19 (AB,  $J = 9.5$  Hz, 2H), 7.22 and 7.56 (AA'XX',  $J = 8.6$ , 4H).  $^{13}\text{C}$  NMR (100 MHz,  $\text{CDCl}_3$ ):  $\delta$  24.5, 26.0, 27.6, 33.1, 40.3, 41.3, 53.3, 69.1, 103.4, 114.1 (2C), 119.7, 133.6 (2C), 145.5, 152.0, 194.1. Anal. Calcd for  $\text{C}_{17}\text{H}_{17}\text{N}_3\text{O}$ : C, 73.10; H, 6.13; N, 15.04. Found: C, 73.0; H, 6.3; N, 15.2. EIMS (70 eV)  $m/z$ :  $\text{M}^-$  43 (100),  $\text{M}^+$  279 (76.2).

## 2. $^1\text{H}$ and $^{13}\text{C}$ NMR spectra

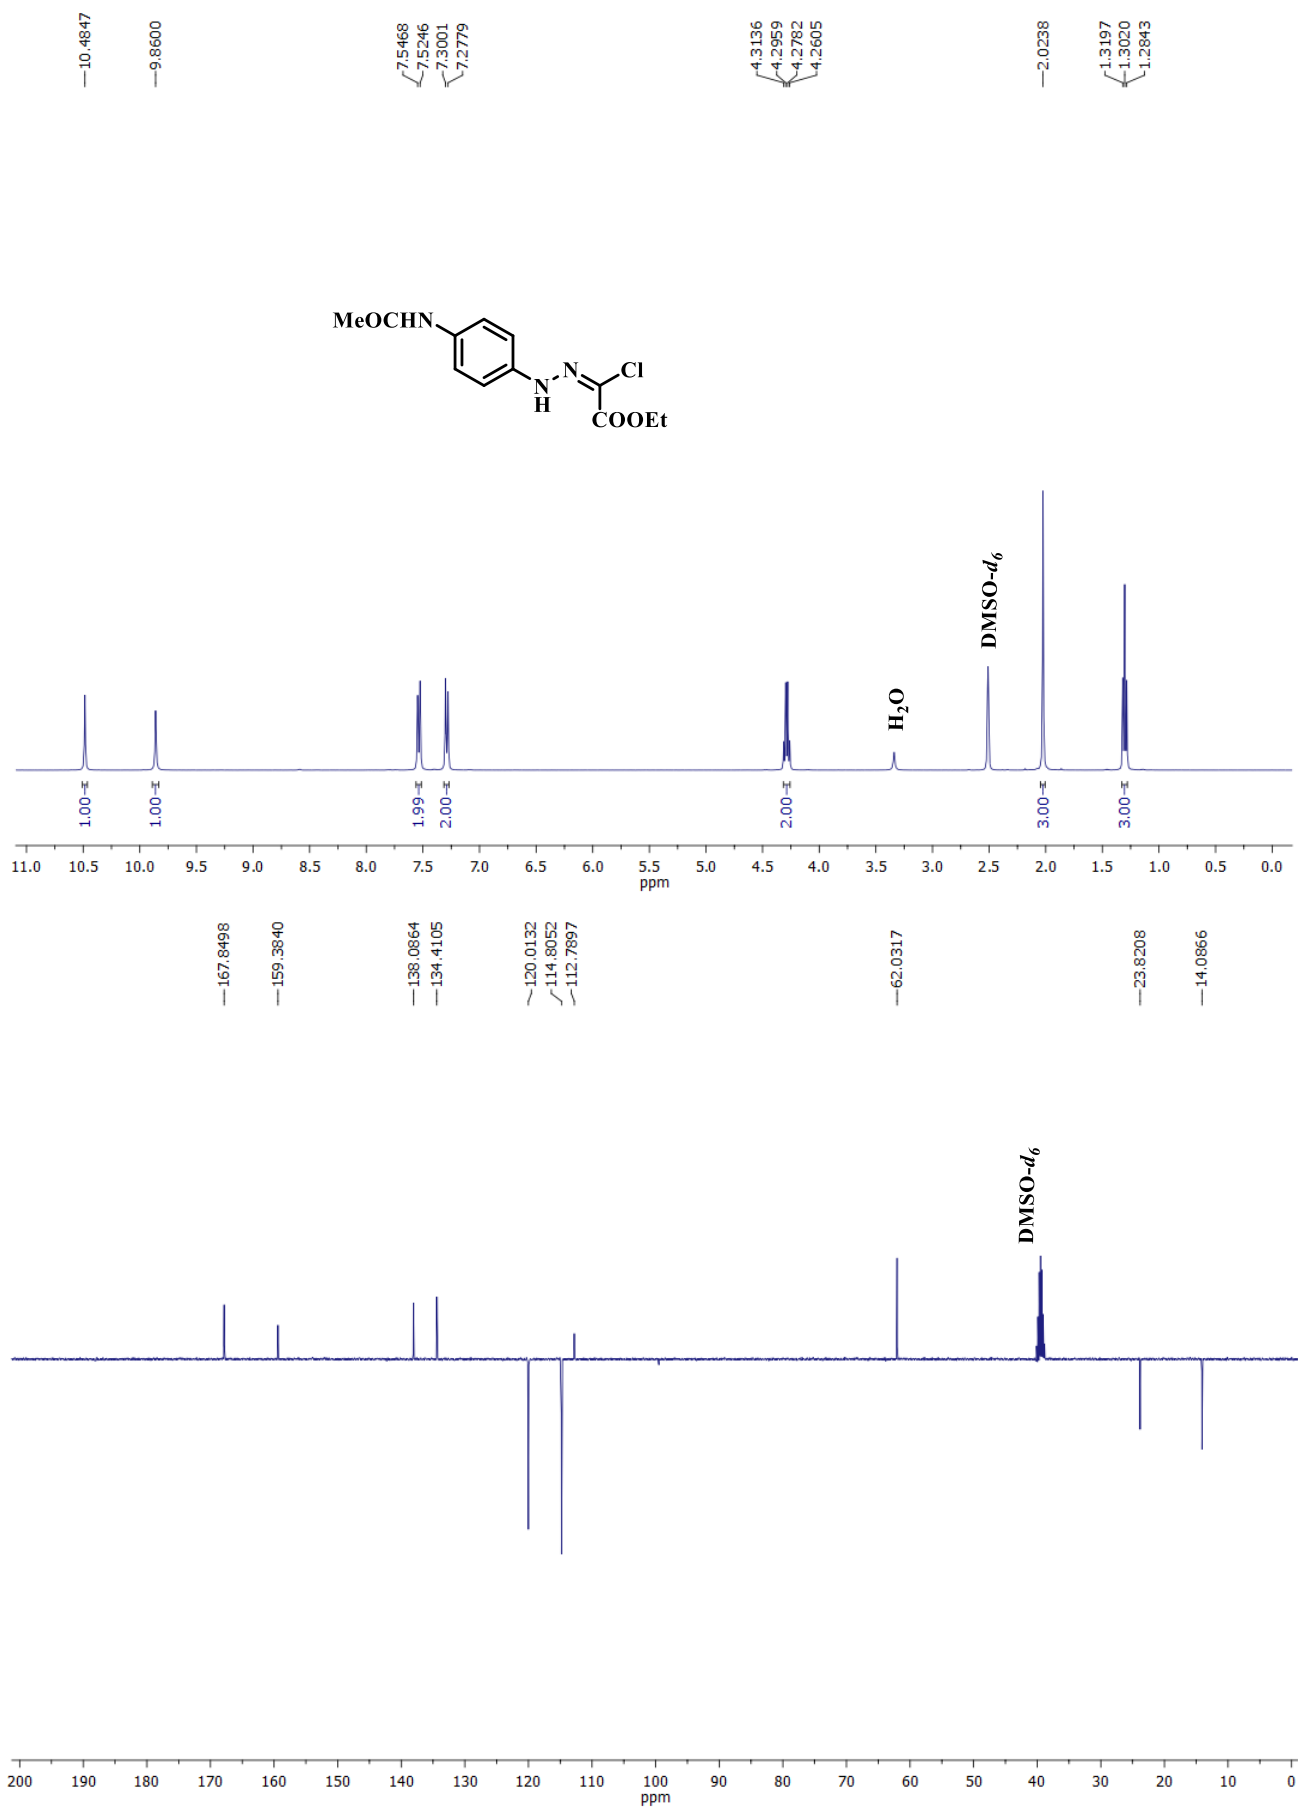

**Fig. S1.**  $^1\text{H}$  NMR (400 MHz,  $\text{DMSO-}d_6$ , TMS),  $^{13}\text{C}$  NMR APT (100 MHz,  $\text{DMSO-}d_6$ ) spectra of ethyl 2-(2-(4-acetamidophenyl)hydrazono)-2-chloroacetate (**1b**).



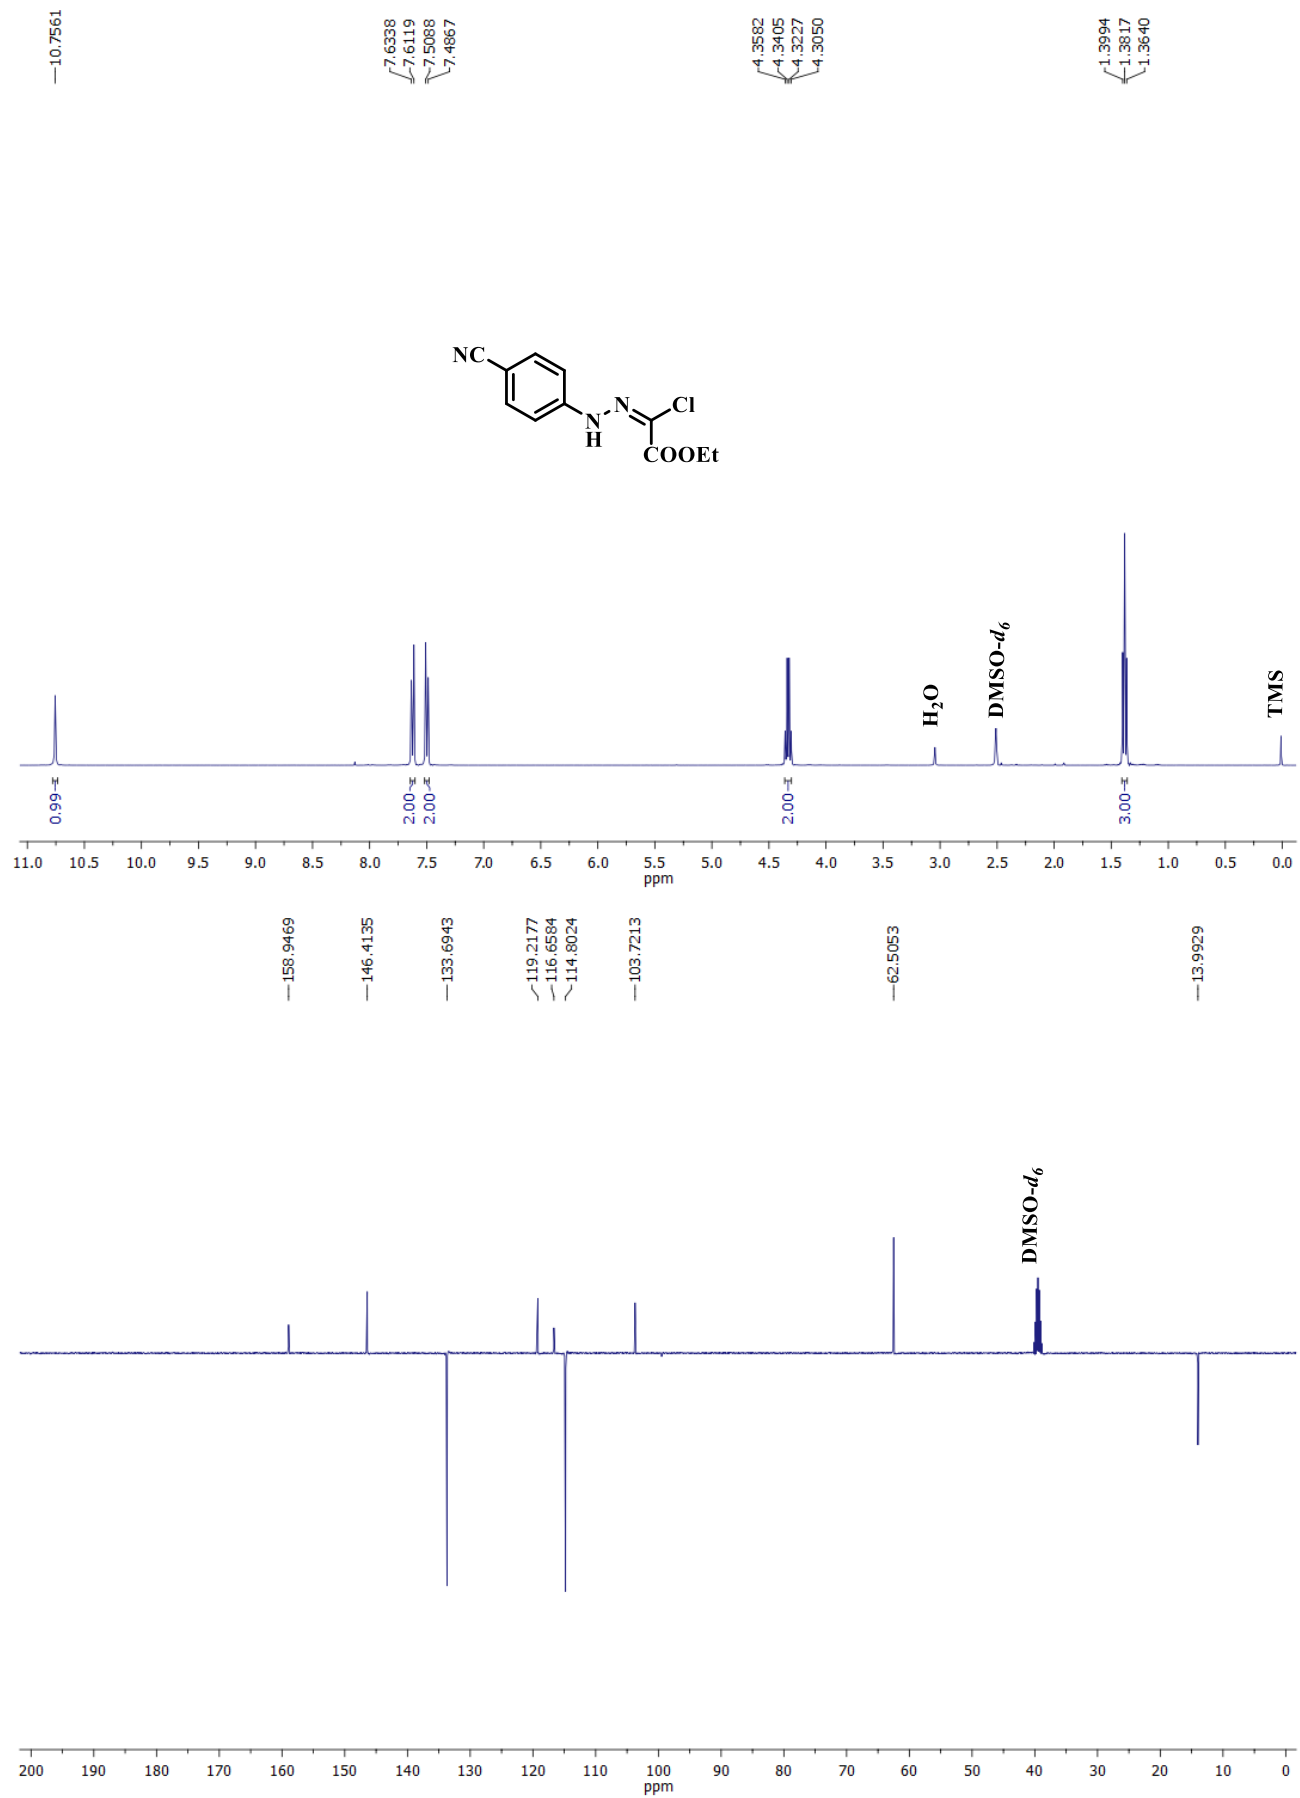

**Fig. S2.** <sup>1</sup>H NMR (400 MHz, DMSO-*d*<sub>6</sub>, TMS), <sup>13</sup>C NMR APT (100 MHz, DMSO-*d*<sub>6</sub>) spectra of ethyl 2-chloro-2-(2-(4-cyanophenyl)hydrazono)acetate (**1g**).

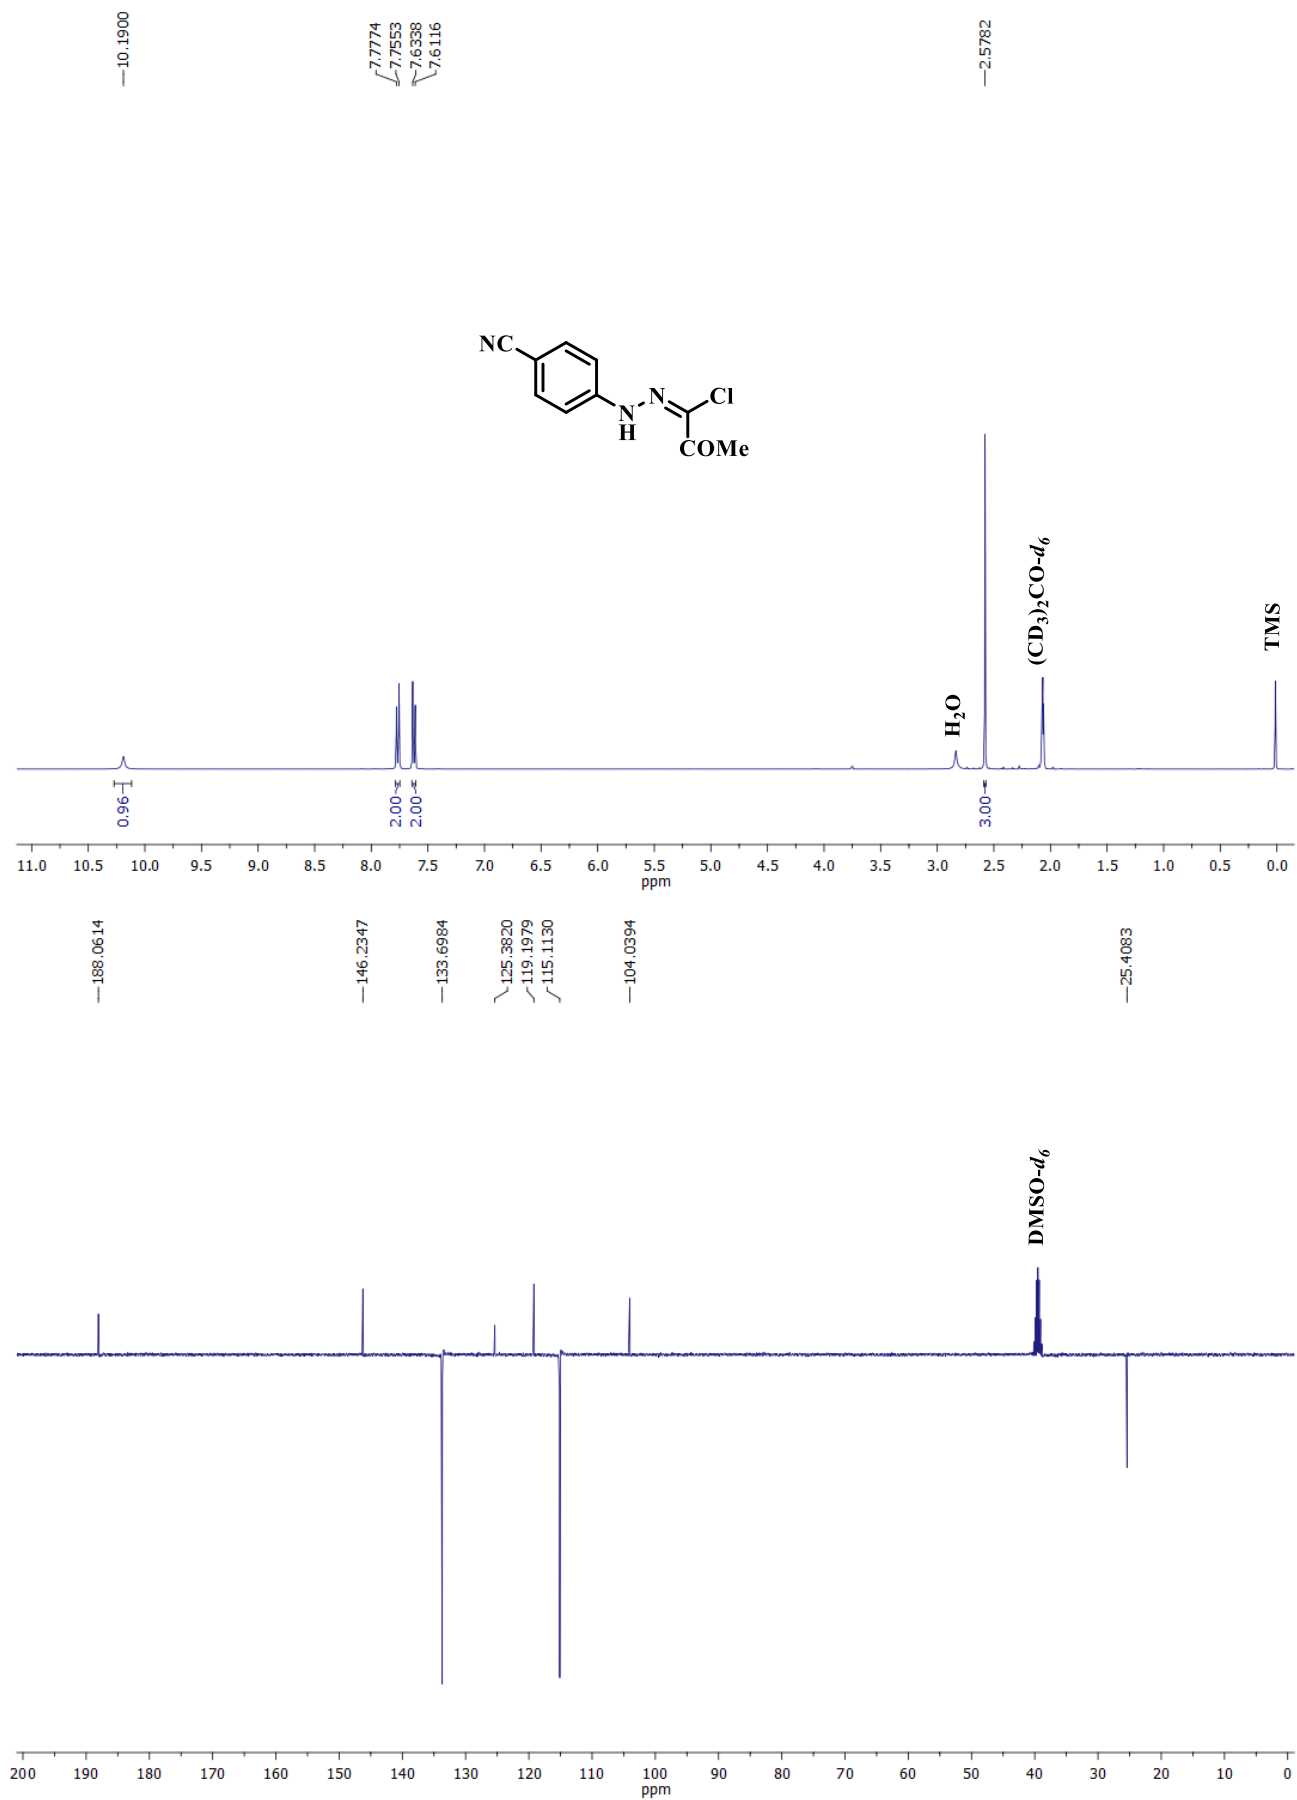

**Fig. S3.** <sup>1</sup>H NMR (400 MHz, (CD<sub>3</sub>)<sub>2</sub>CO-*d*<sub>6</sub>, TMS), <sup>13</sup>C NMR APT (100 MHz, DMSO-*d*<sub>6</sub>) spectra of *N*-(4-cyanophenyl)-2-oxopropanehydrazonyl chloride (**1k**).

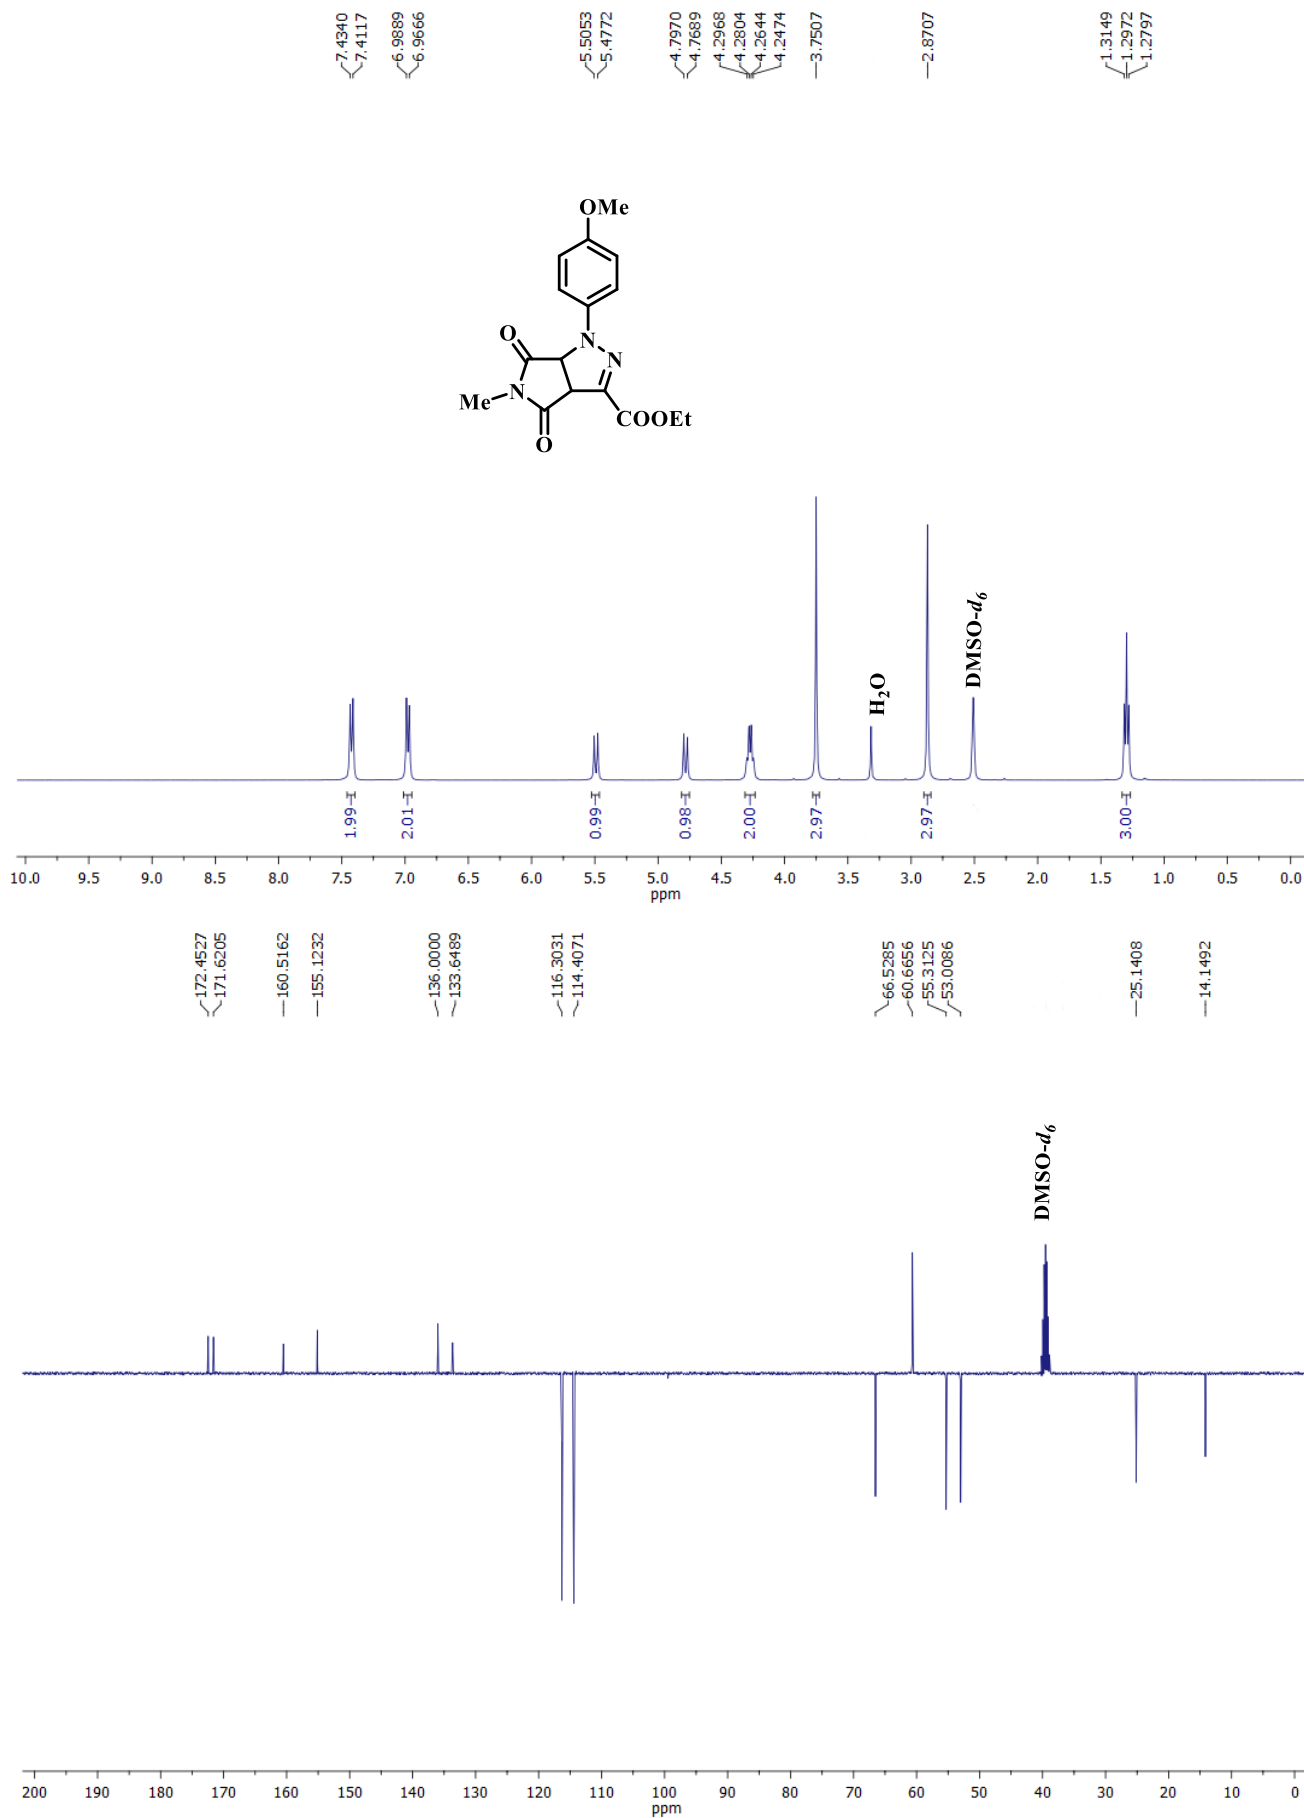

**Fig. S4.** <sup>1</sup>H NMR (400 MHz, DMSO-*d*<sub>6</sub>), <sup>13</sup>C NMR APT (100 MHz, DMSO-*d*<sub>6</sub>) spectra of ethyl 1-(4-methoxyphenyl)-5-methyl-4,6-dioxo-1,3a,4,5,6,6a-hexahydropyrrolo[3,4-c]pyrazole-3-carboxylate (**2a**).

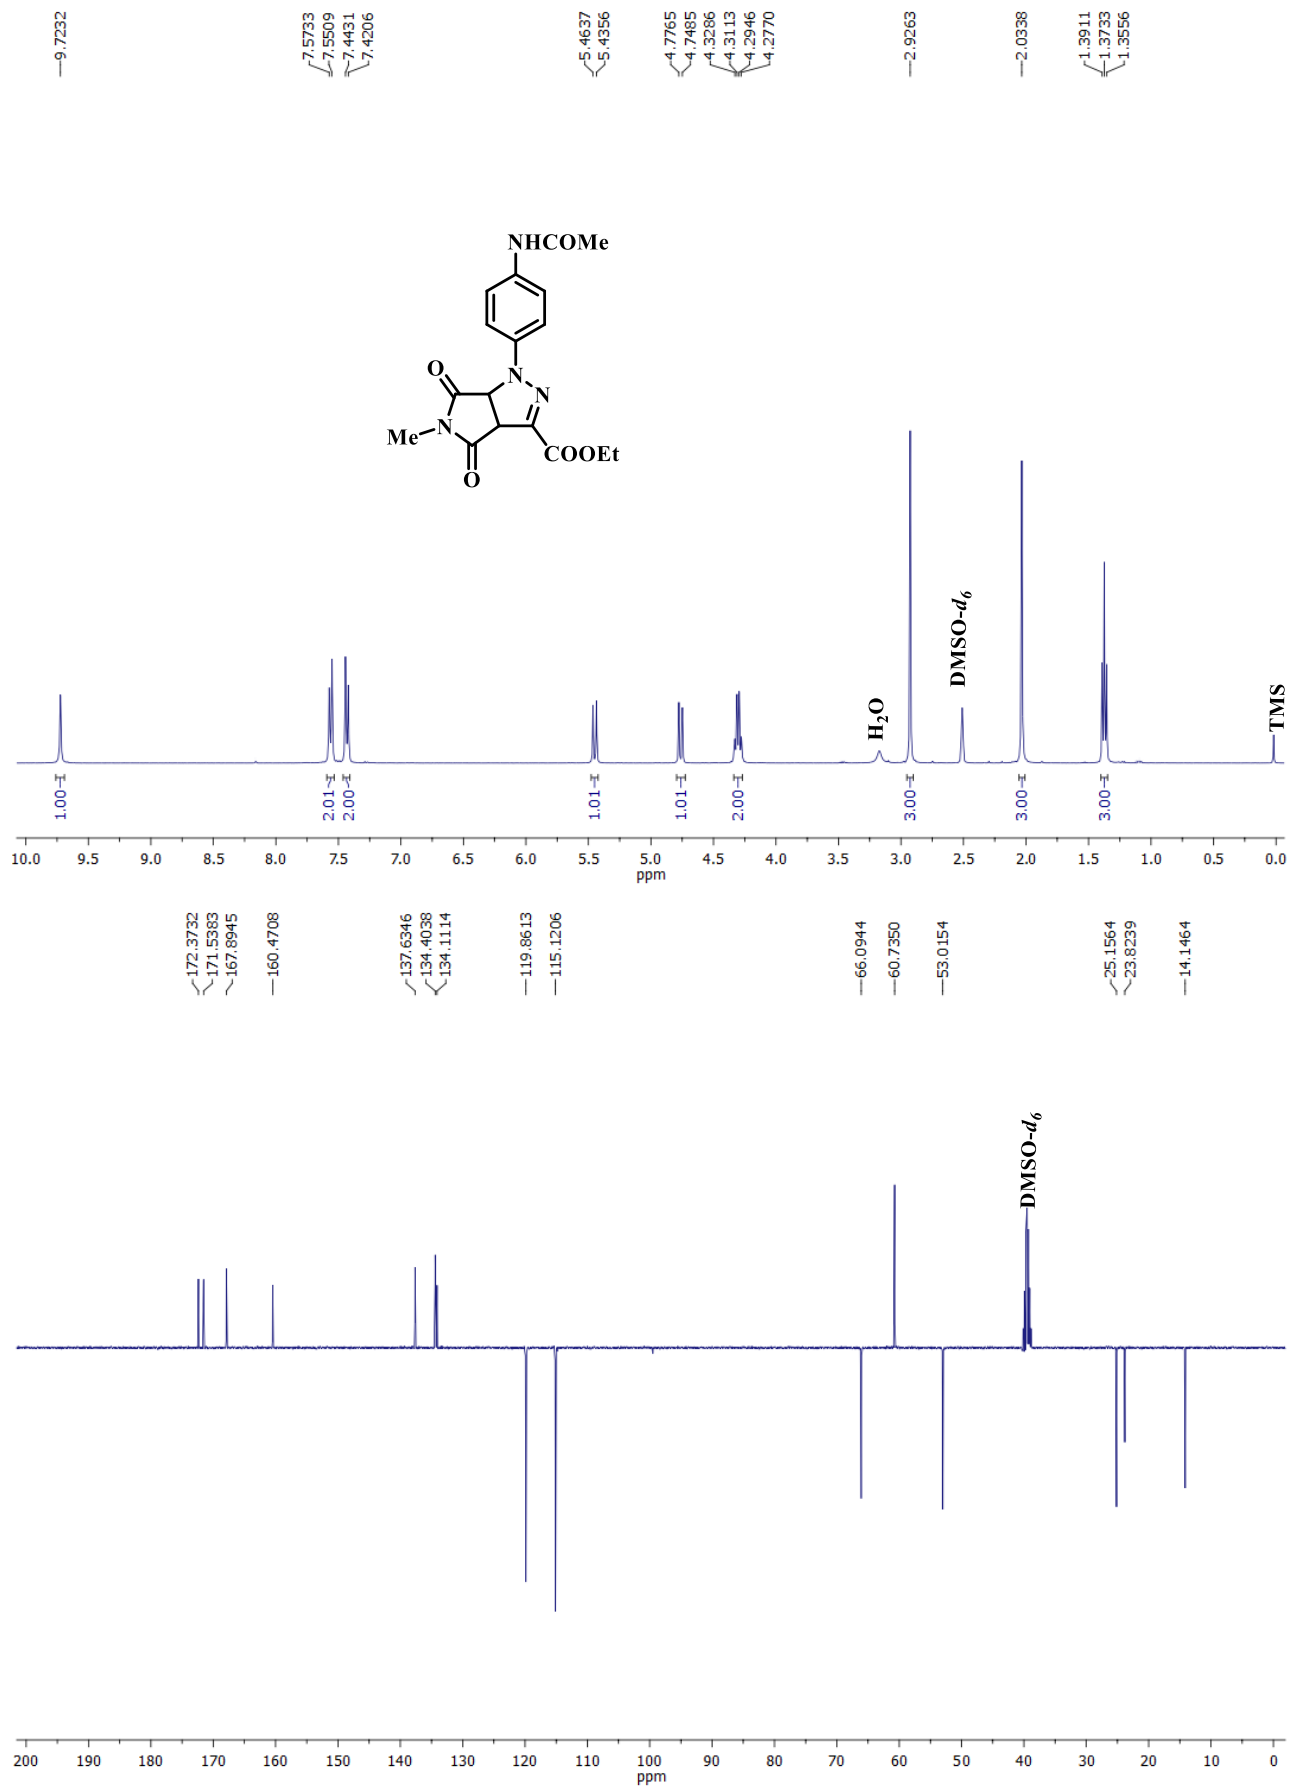

**Fig. S5.** <sup>1</sup>H NMR (400 MHz, DMSO-*d*<sub>6</sub>, TMS) and <sup>13</sup>C NMR APT (100 MHz, DMSO-*d*<sub>6</sub>) spectra of ethyl 1-(4-acetamidophenyl)-5-methyl-4,6-dioxo-1,3a,4,5,6,6a-hexahydropyrrolo[3,4-c]pyrazole-3-carboxylate (2b).

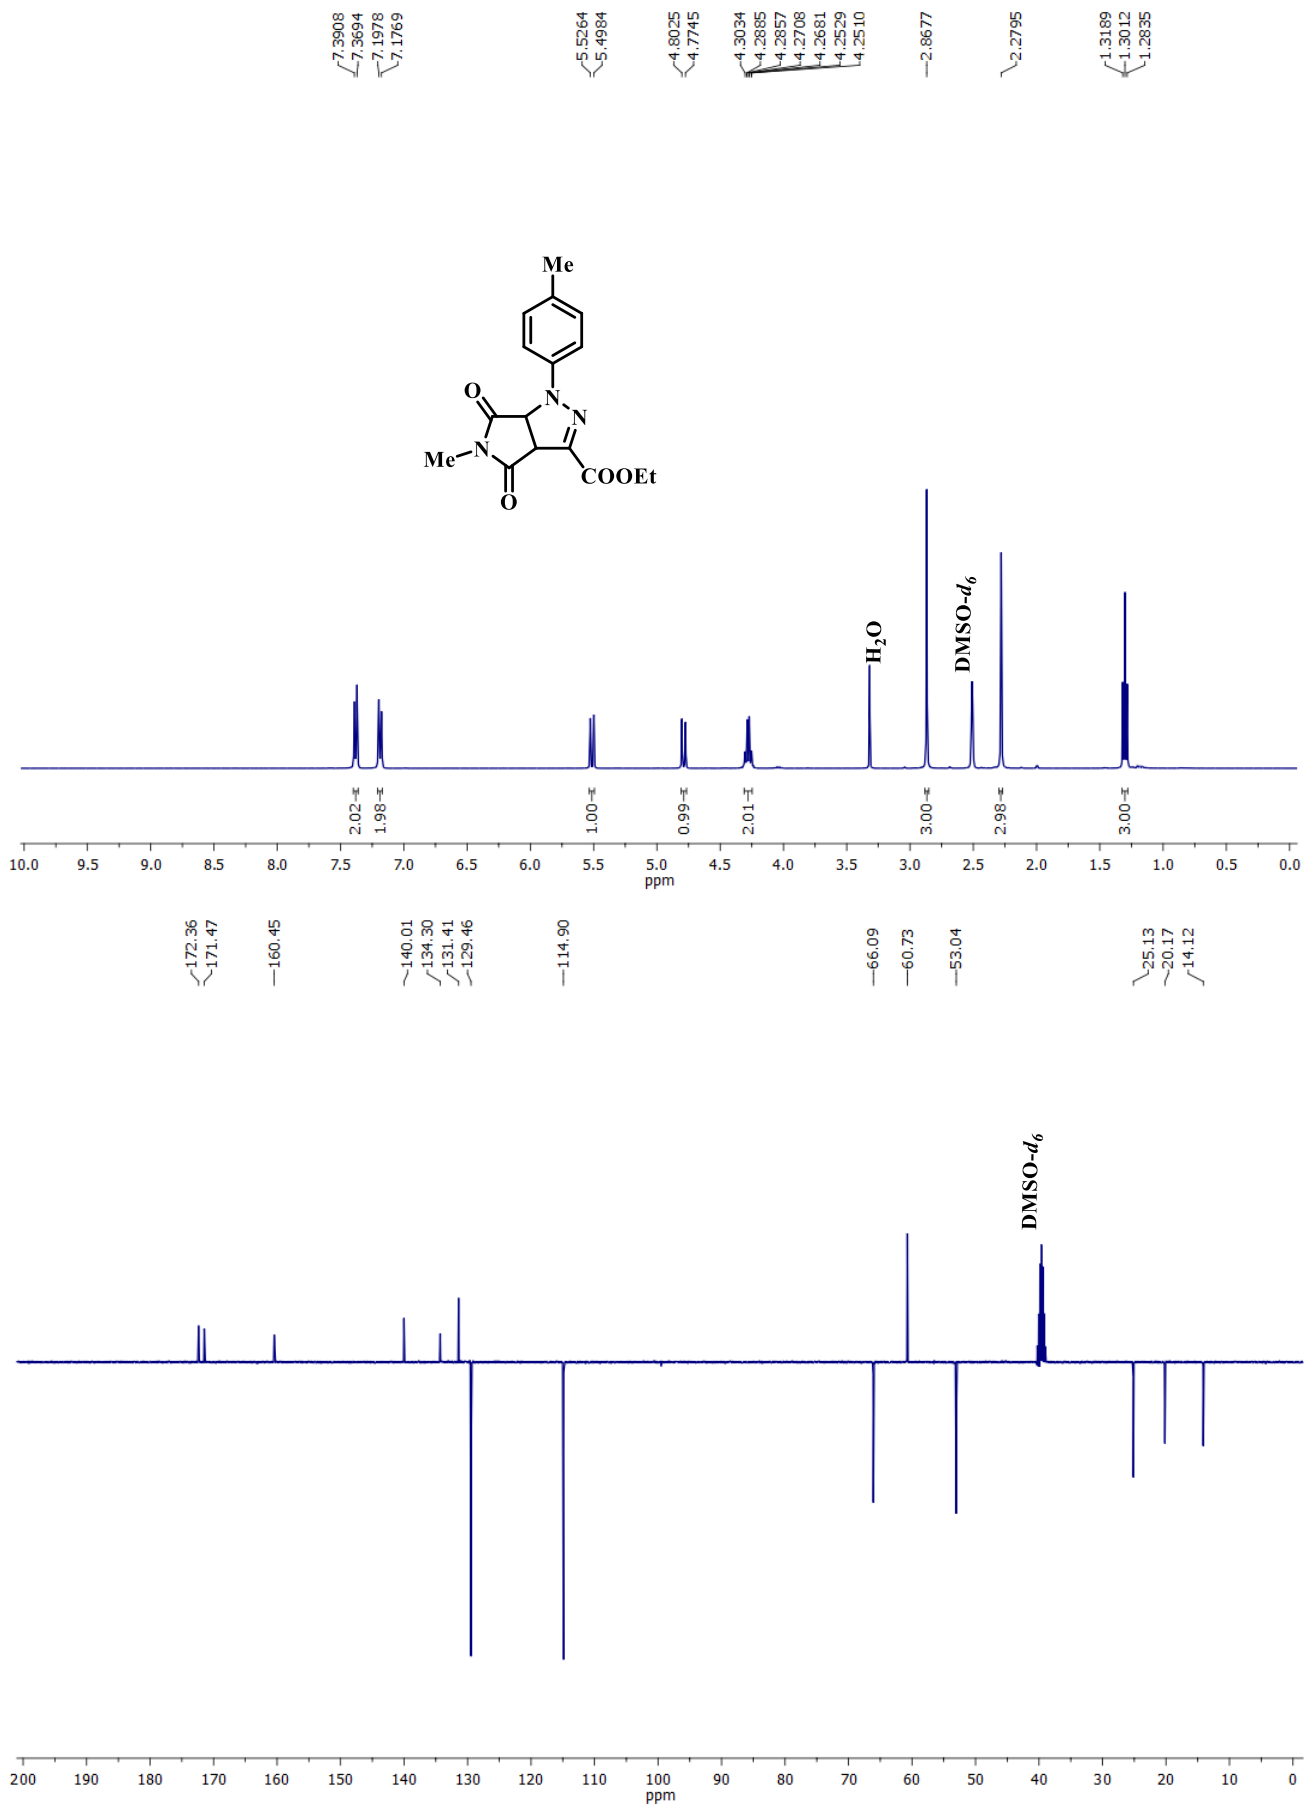

**Fig. S6.** <sup>1</sup>H NMR (400 MHz, DMSO-*d*<sub>6</sub>) and <sup>13</sup>C NMR APT (100 MHz, DMSO-*d*<sub>6</sub>) spectra of ethyl 5-methyl-4,6-dioxo-1-(*p*-tolyl)-1,3*a*,4,5,6,6*a*-hexahydropyrrolo[3,4-*c*]pyrazole-3-carboxylate (**2c**).

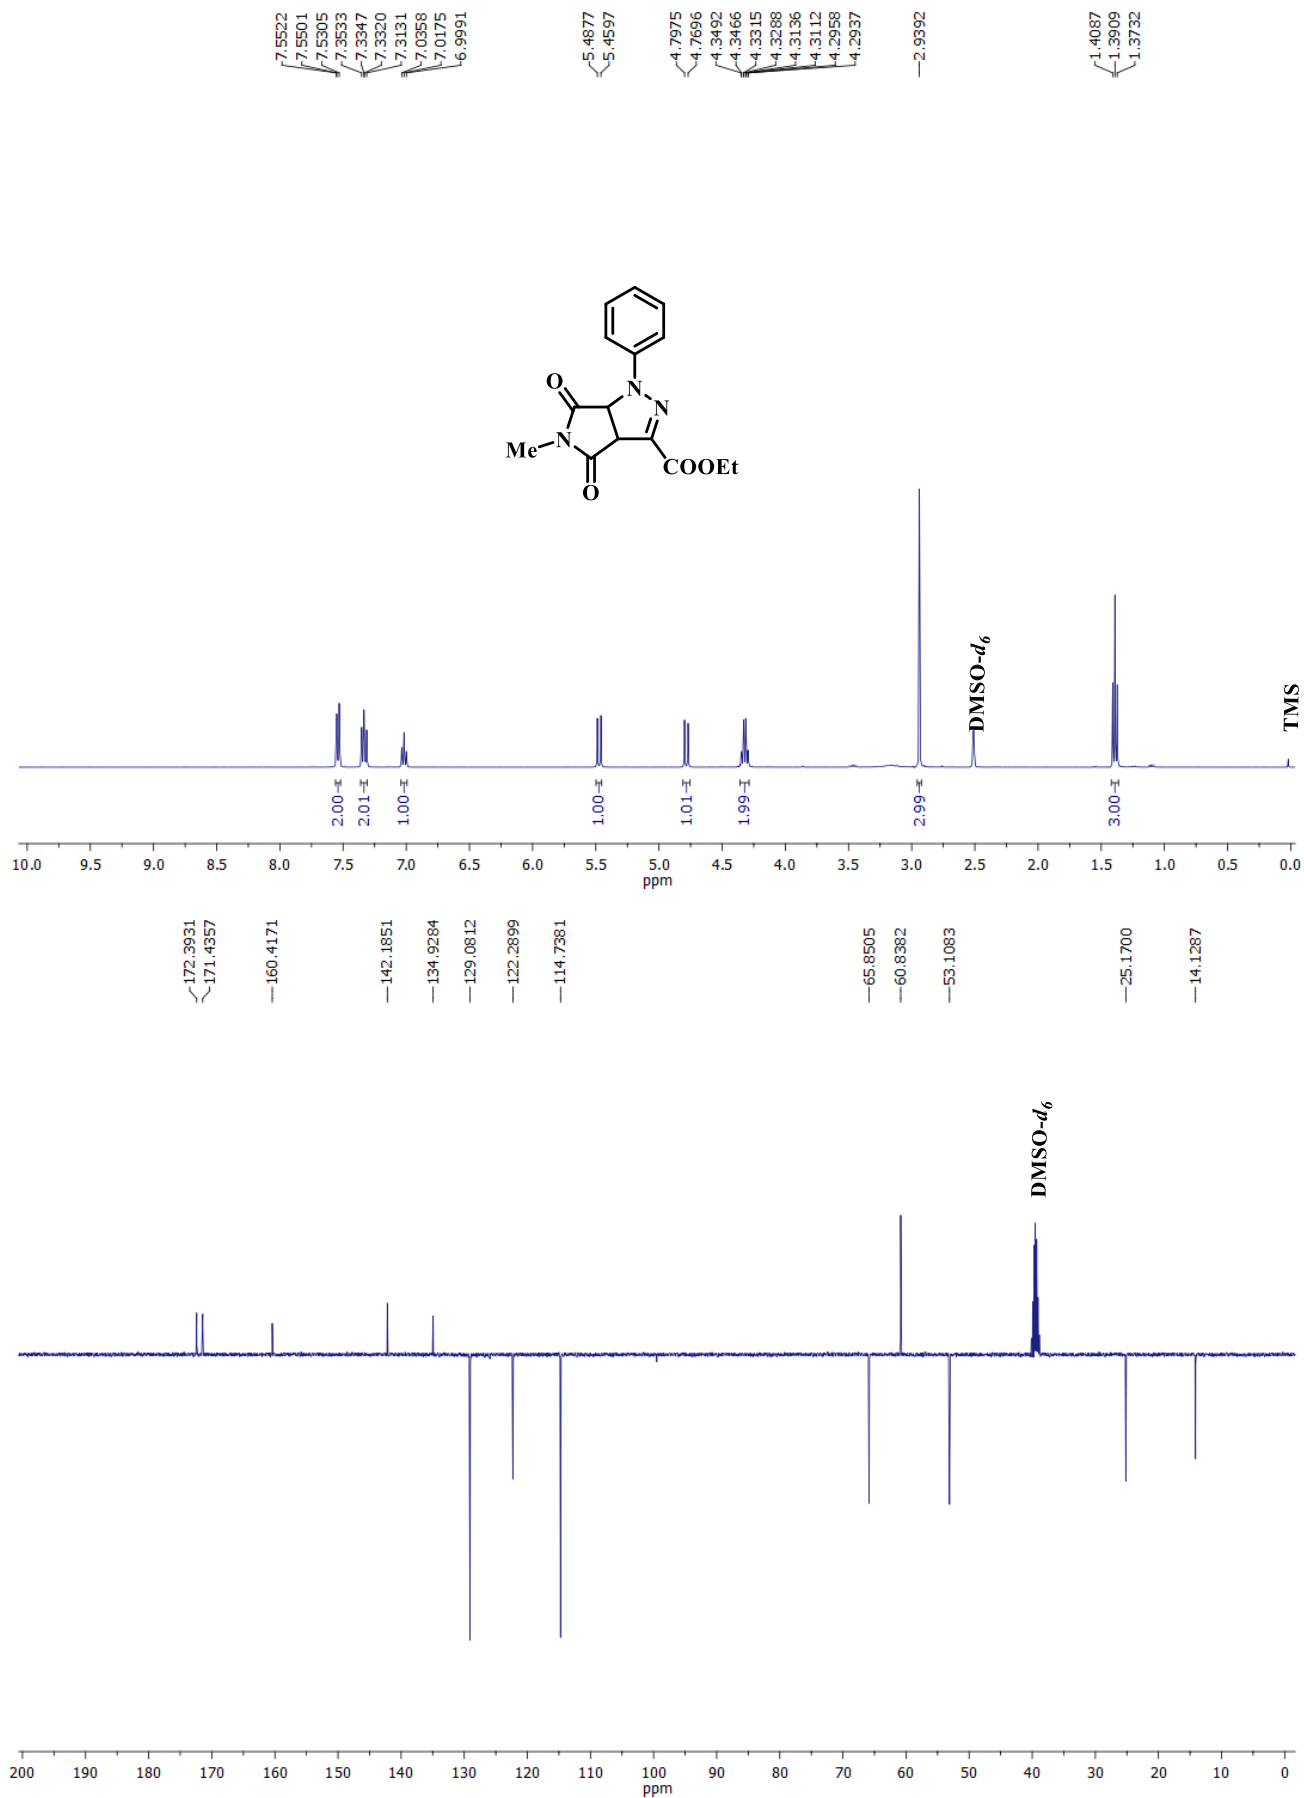

**Fig. S7.** <sup>1</sup>H NMR (400 MHz, DMSO-*d*<sub>6</sub>, TMS) and <sup>13</sup>C NMR APT (100 MHz, DMSO-*d*<sub>6</sub>) spectra of ethyl 5-methyl-4,6-dioxo-1-phenyl-1,3a,4,5,6,6a-hexahydropyrrolo[3,4-c]pyrazole-3-carboxylate (**2d**).

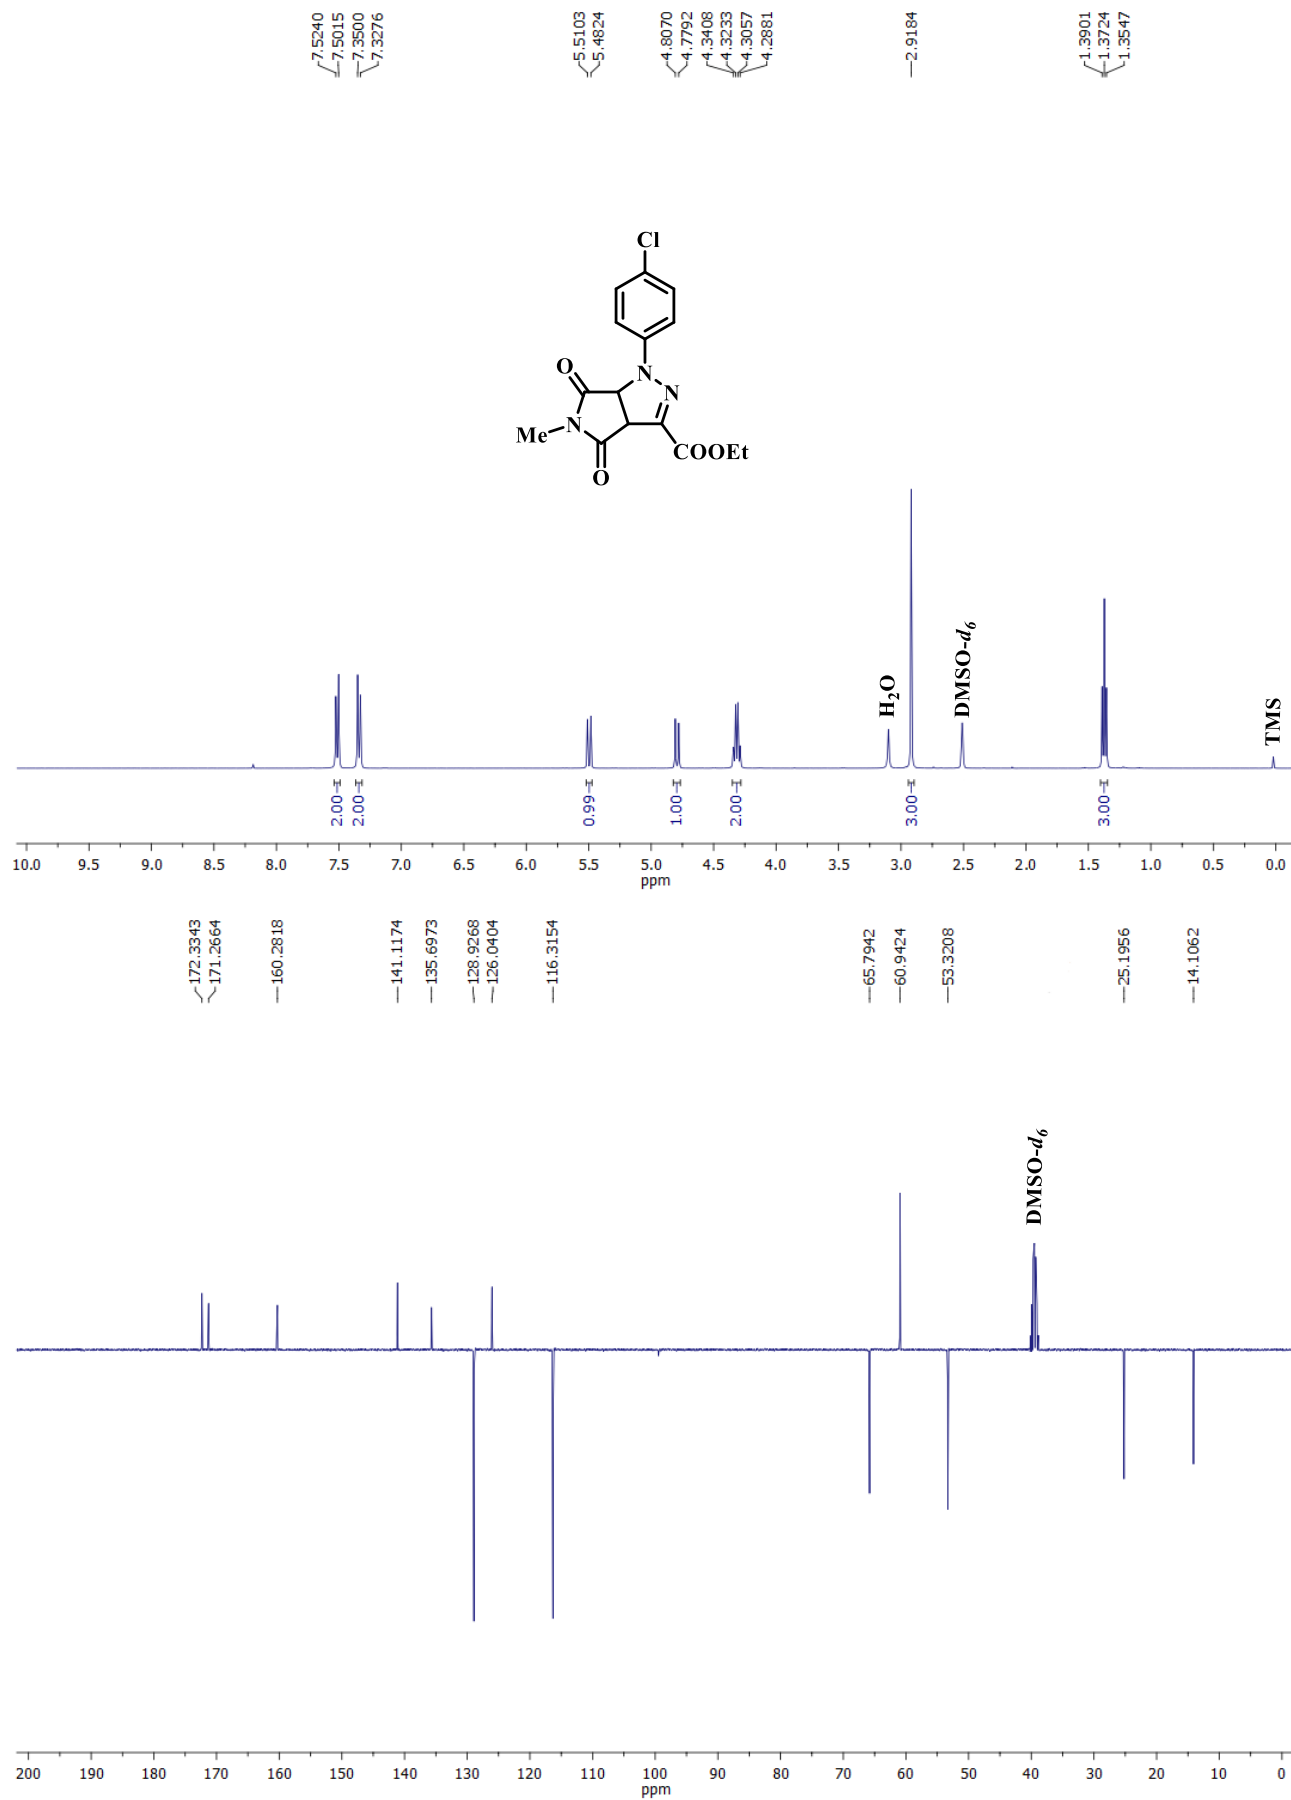

**Fig. S8.** <sup>1</sup>H NMR (400 MHz, DMSO-*d*<sub>6</sub>, TMS) and <sup>13</sup>C NMR APT (100 MHz, DMSO-*d*<sub>6</sub>) spectra of ethyl 1-(4-chlorophenyl)-5-methyl-4,6-dioxo-1,3a,4,5,6,6a-hexahydropyrrolo[3,4-*c*]pyrazole-3-carboxylate (**2e**).

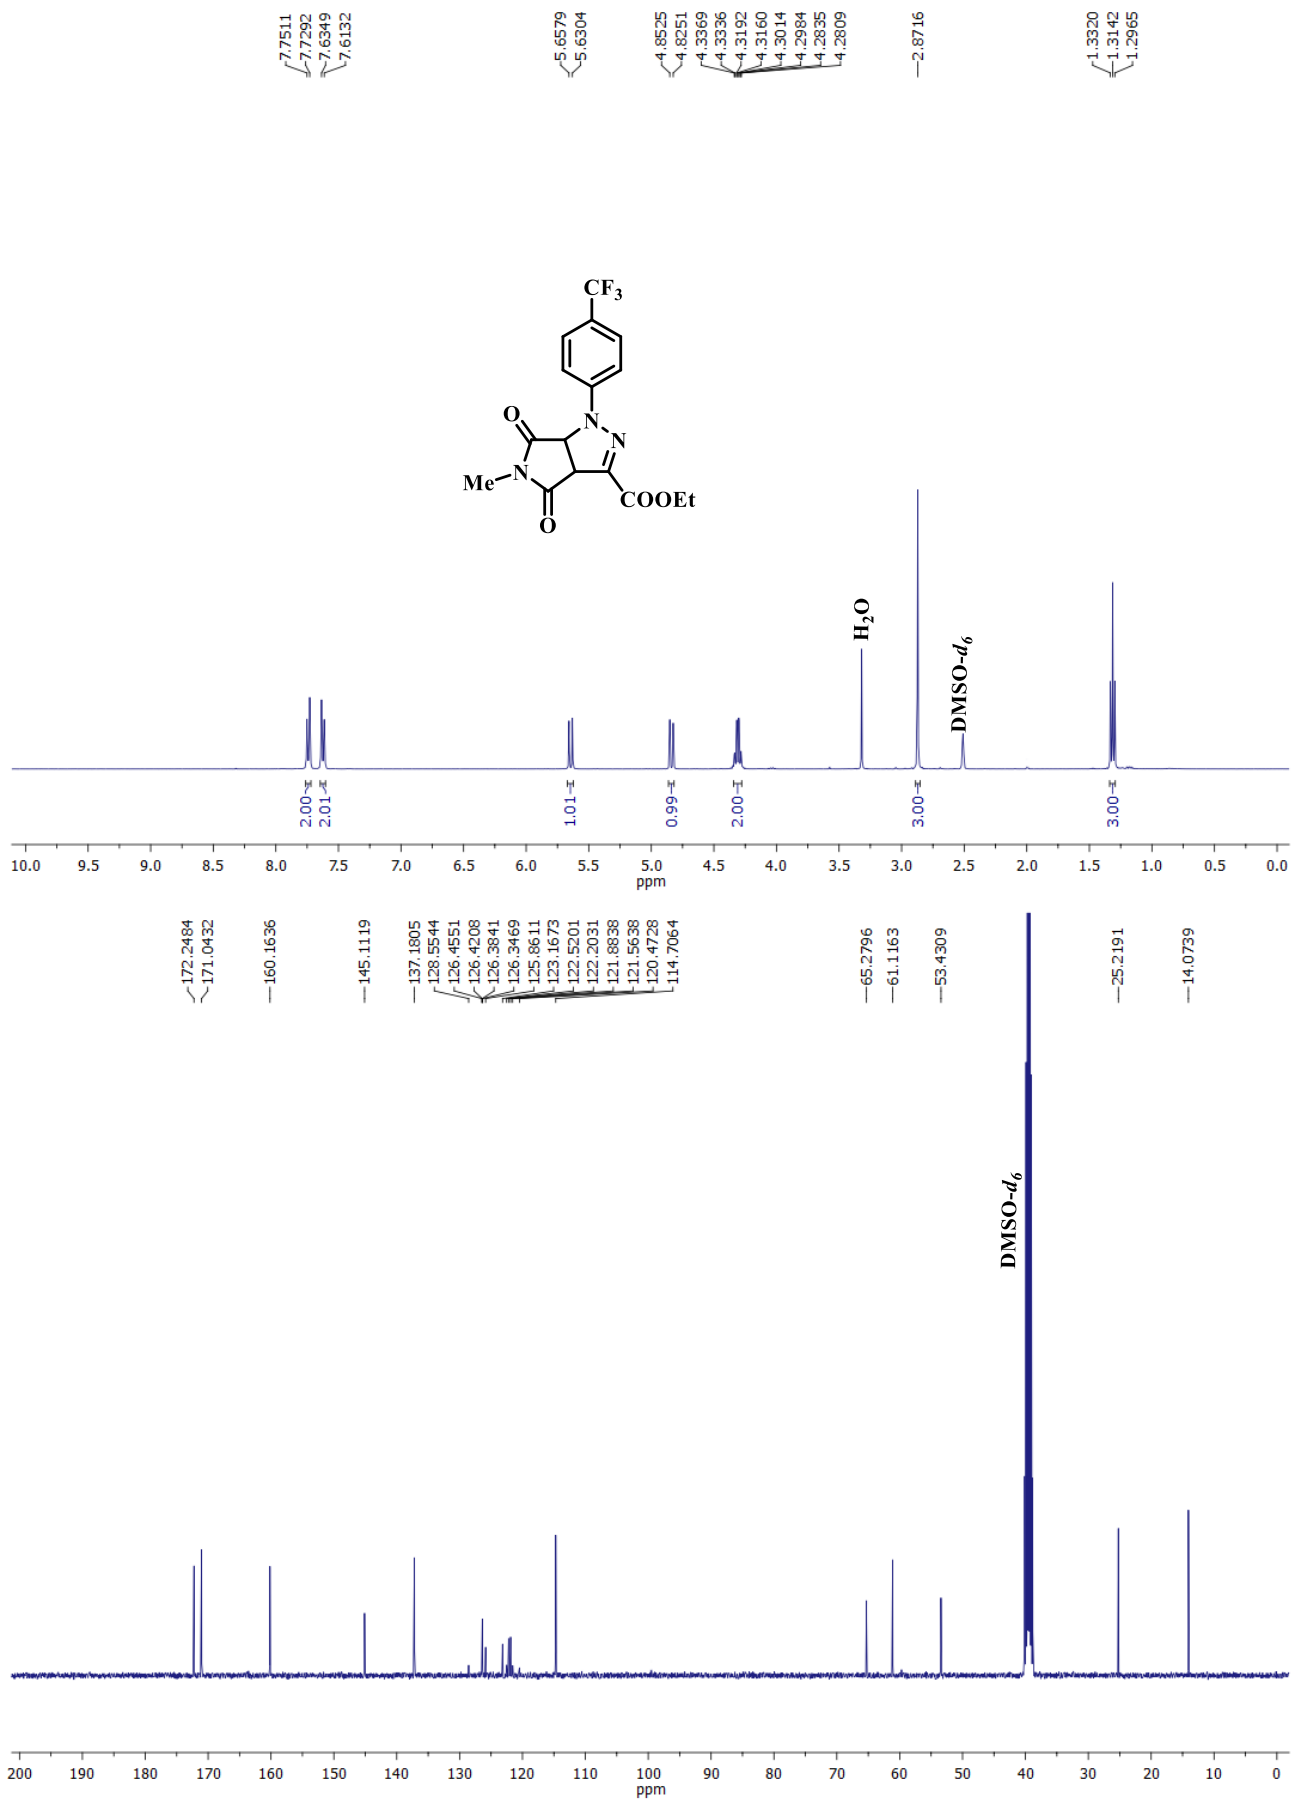

**Fig. S9.** <sup>1</sup>H NMR (400 MHz, DMSO-*d*<sub>6</sub>) and <sup>13</sup>C NMR (100 MHz, DMSO-*d*<sub>6</sub>) spectra of ethyl 5-methyl-4,6-dioxo-1-(4-(trifluoromethyl)phenyl)-1,3a,4,5,6,6a-hexahydropyrrolo[3,4-*c*]pyrazole-3-carboxylate (**2f**)



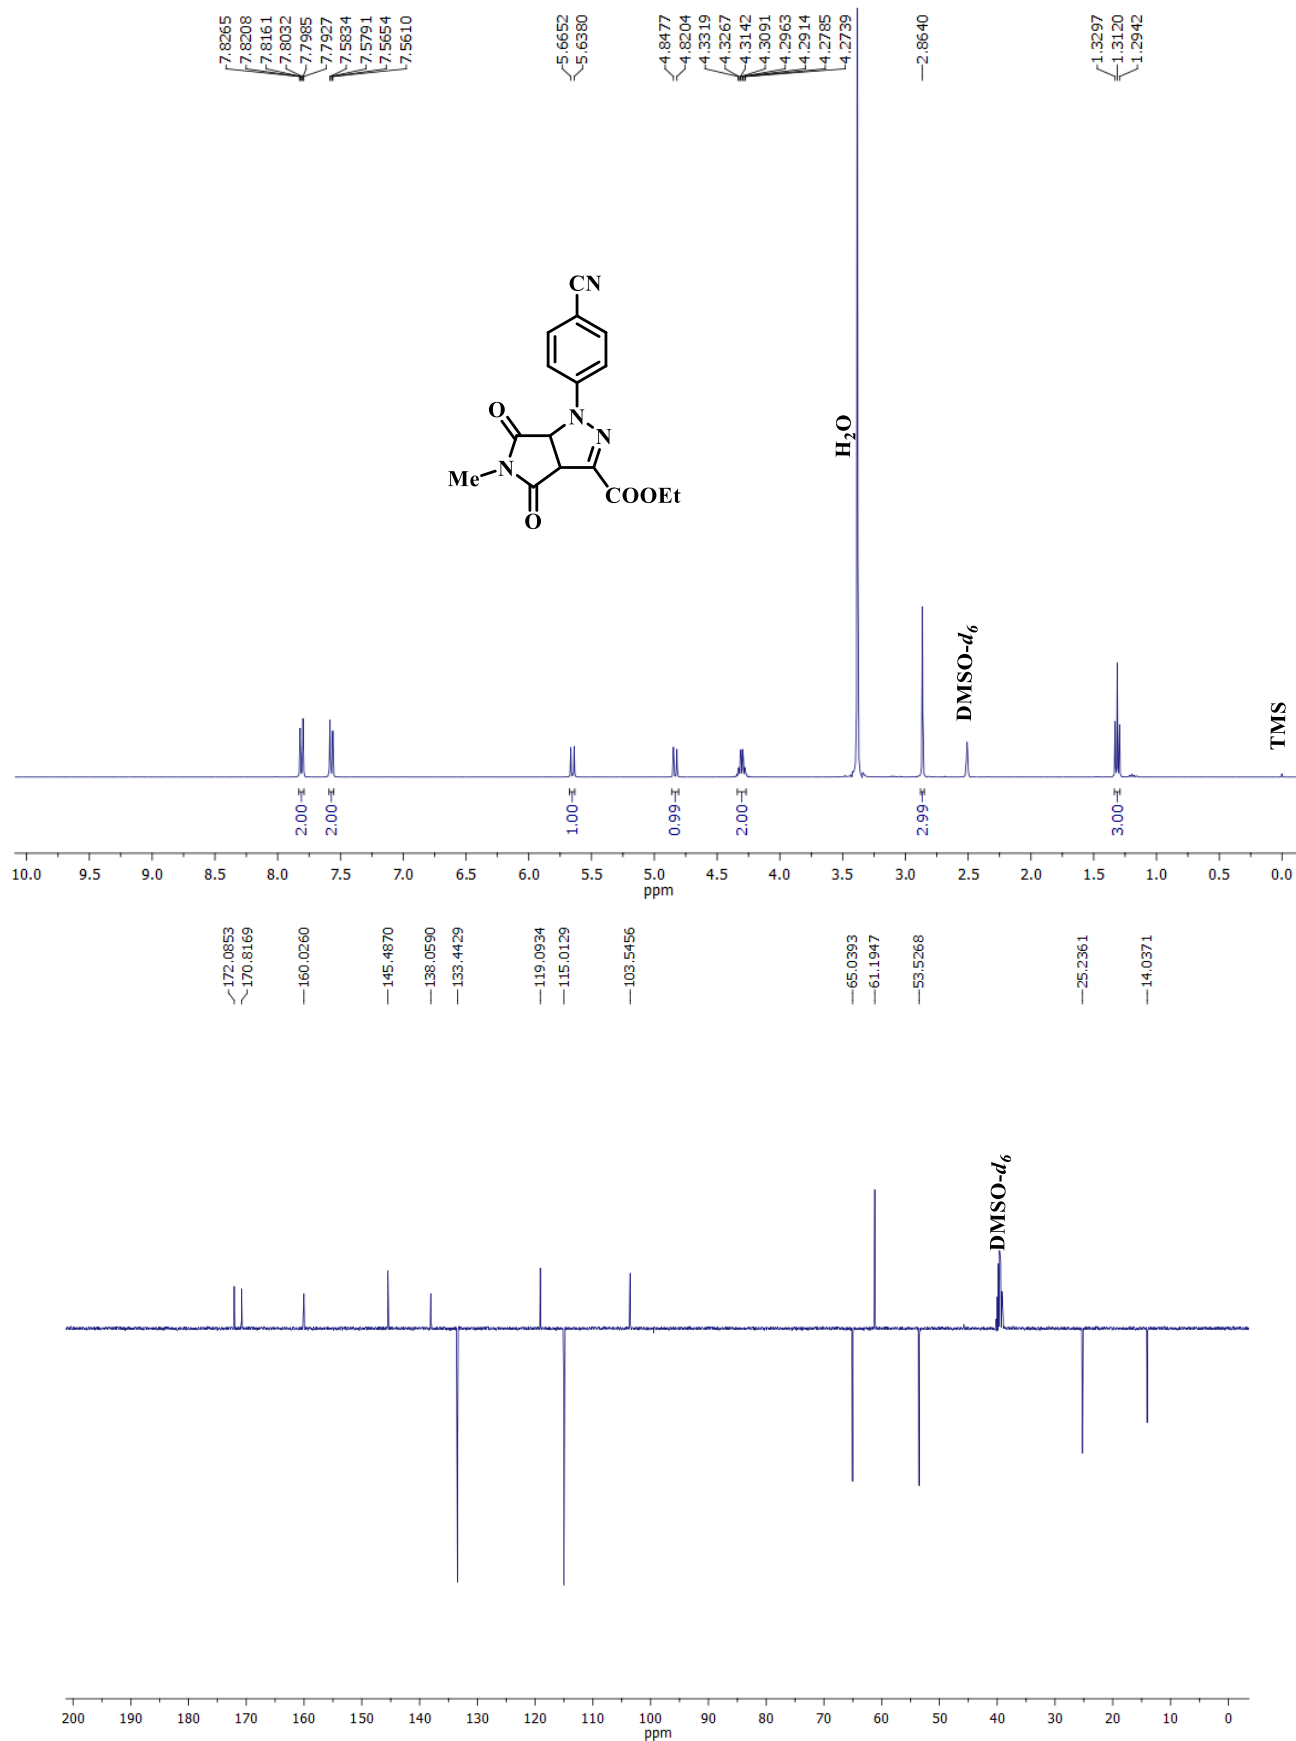

**Fig. S10.** <sup>1</sup>H NMR (400 MHz, DMSO-*d*<sub>6</sub>, TMS) and <sup>13</sup>C NMR APT (100 MHz, DMSO-*d*<sub>6</sub>) spectra of ethyl 1-(4-cyanophenyl)-5-methyl-4,6-dioxo-1,3a,4,5,6,6a-hexahydropyrrolo[3,4-c]pyrazole-3-carboxylate (**2g**).

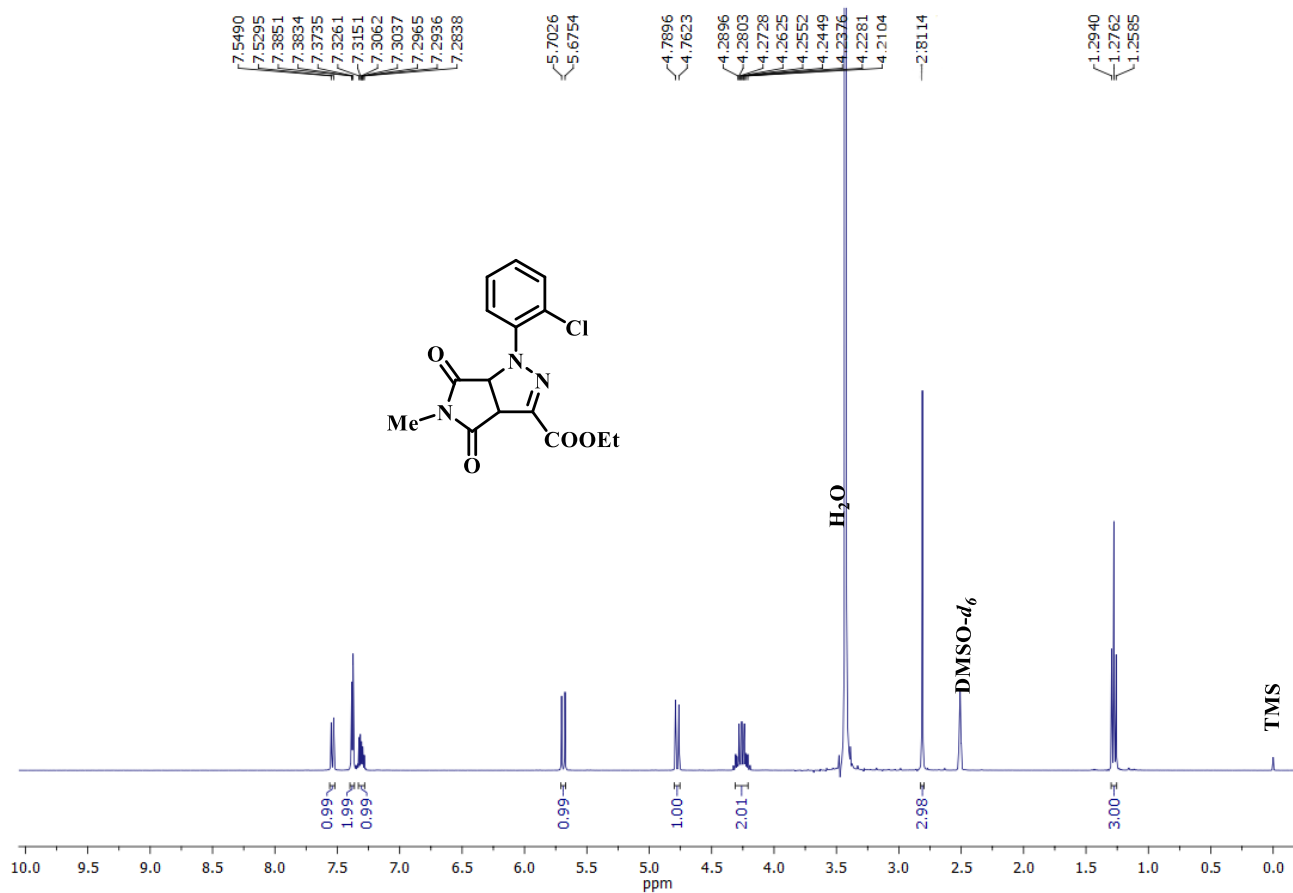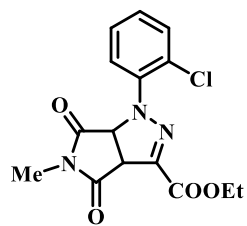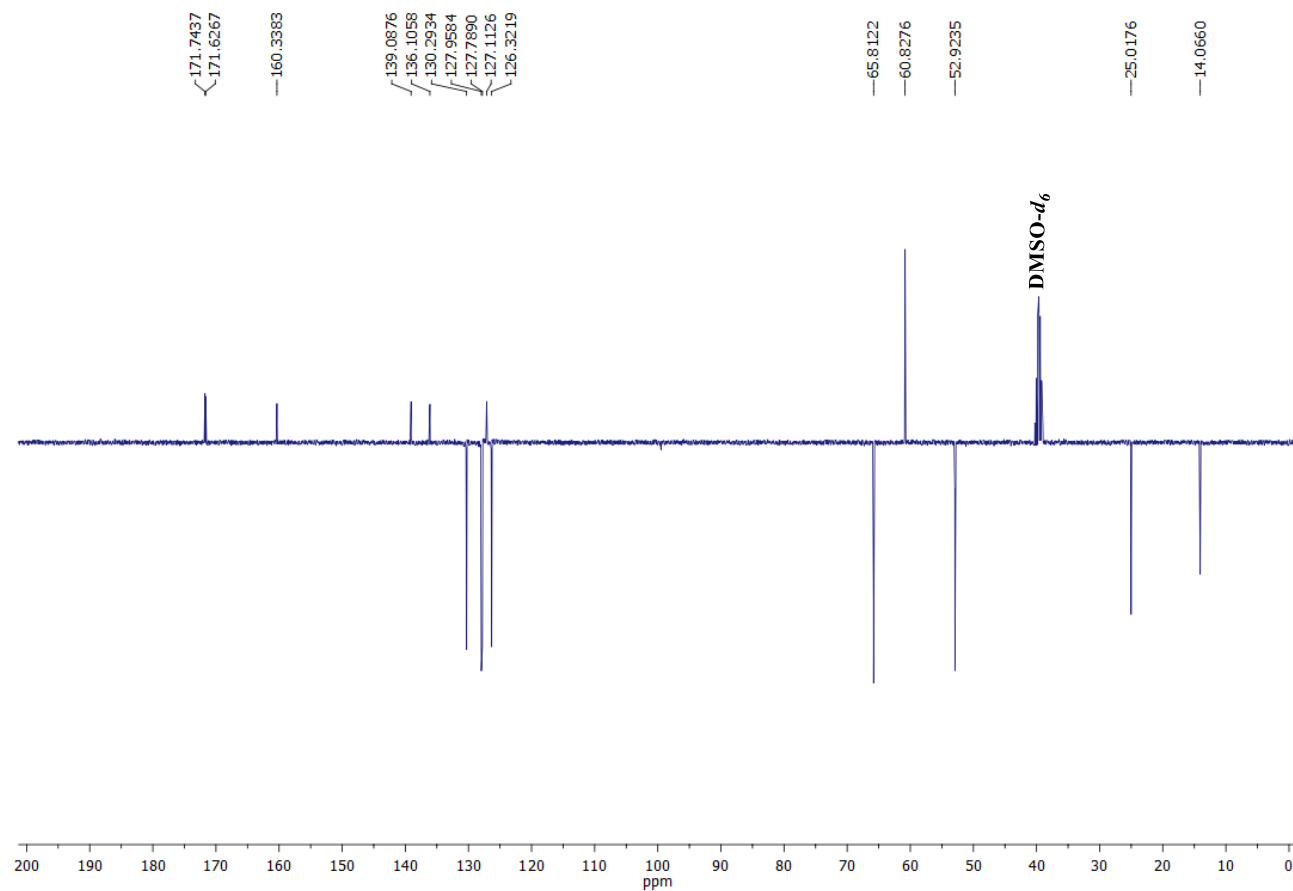

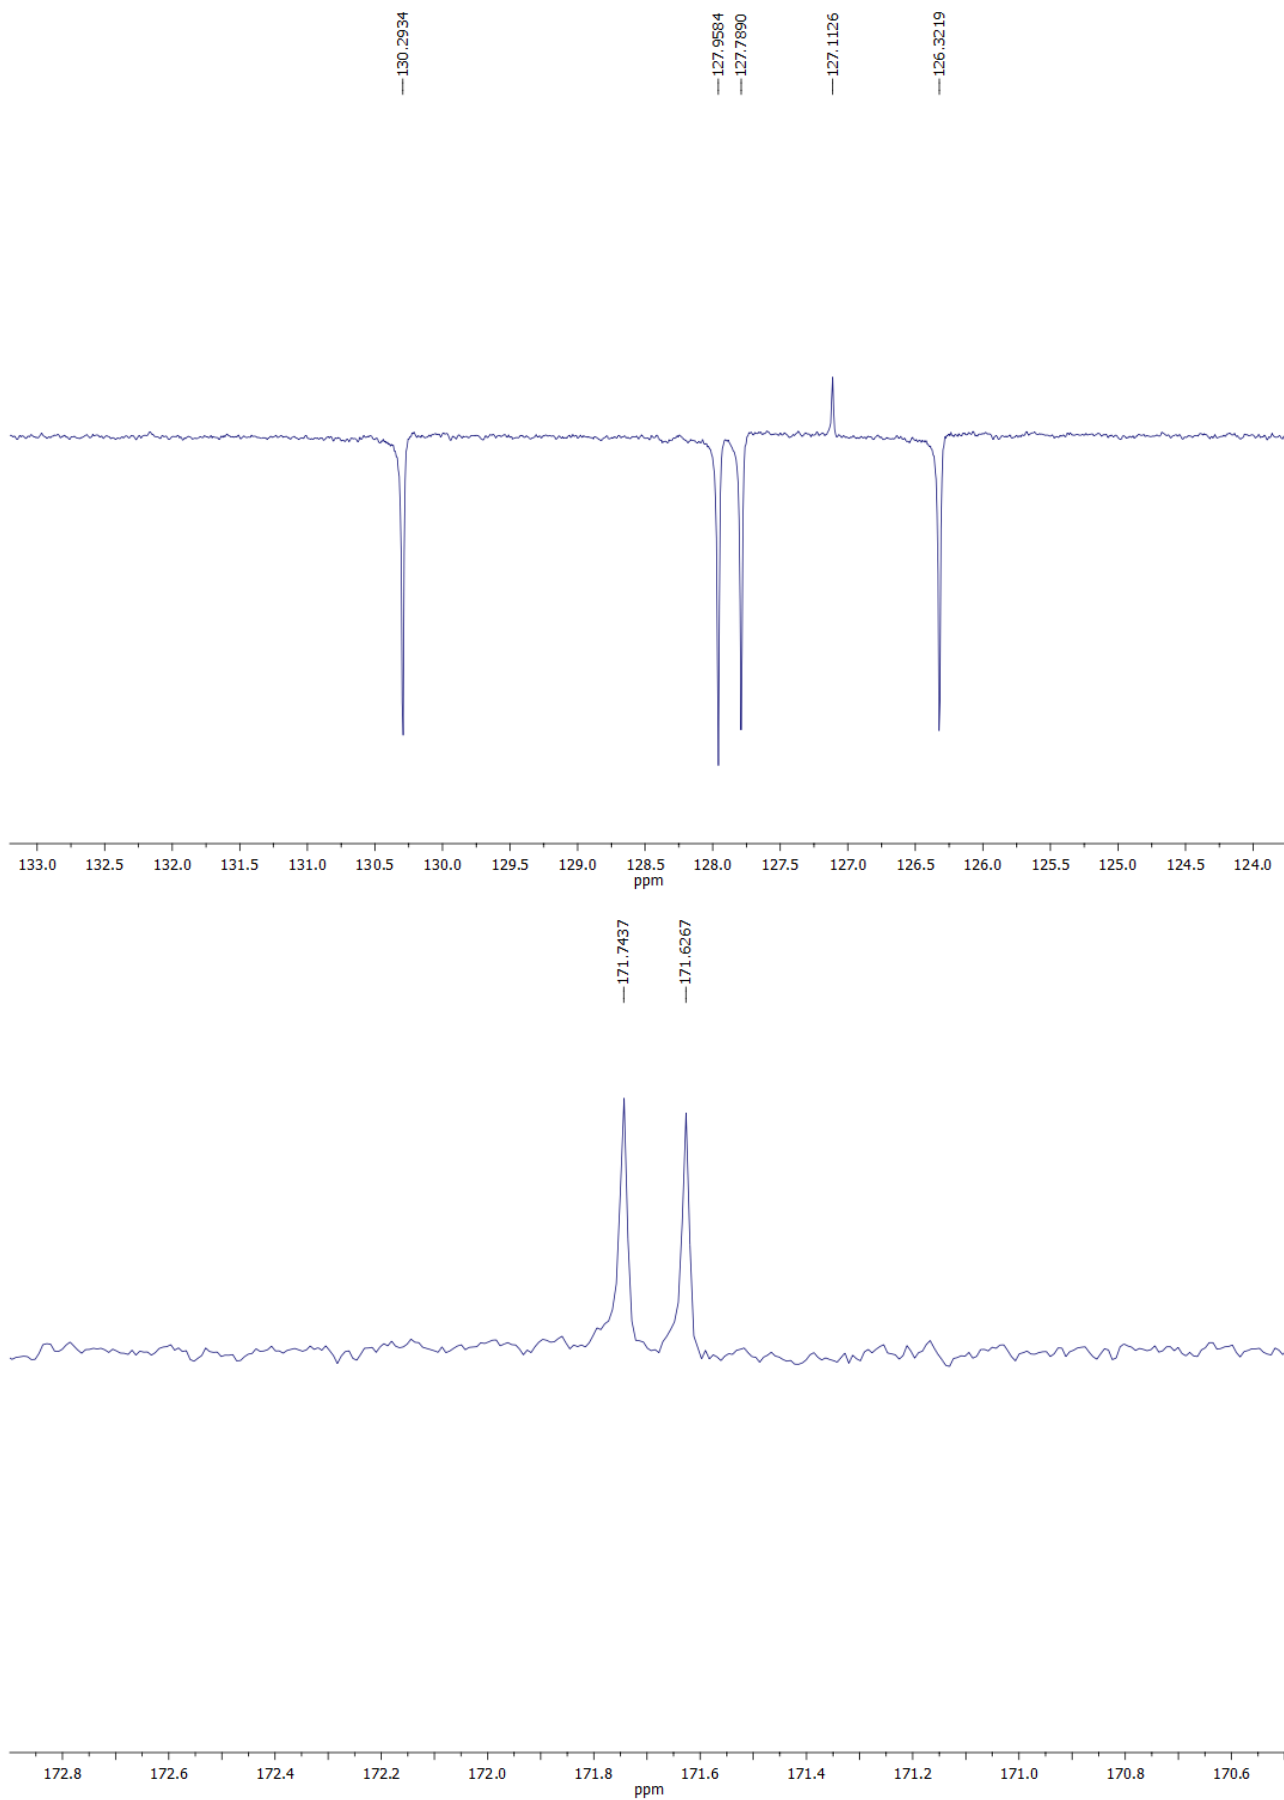

**Fig. S11.** <sup>1</sup>H NMR (400 MHz, DMSO-*d*<sub>6</sub>, TMS) and <sup>13</sup>C NMR APT (100 MHz, DMSO-*d*<sub>6</sub>) spectra of ethyl 1-(2-chlorophenyl)-5-methyl-4,6-dioxo-1,3*a*,4,5,6,6*a*-hexahydropyrrolo[3,4-*c*]pyrazole-3-carboxylate (**2h**).

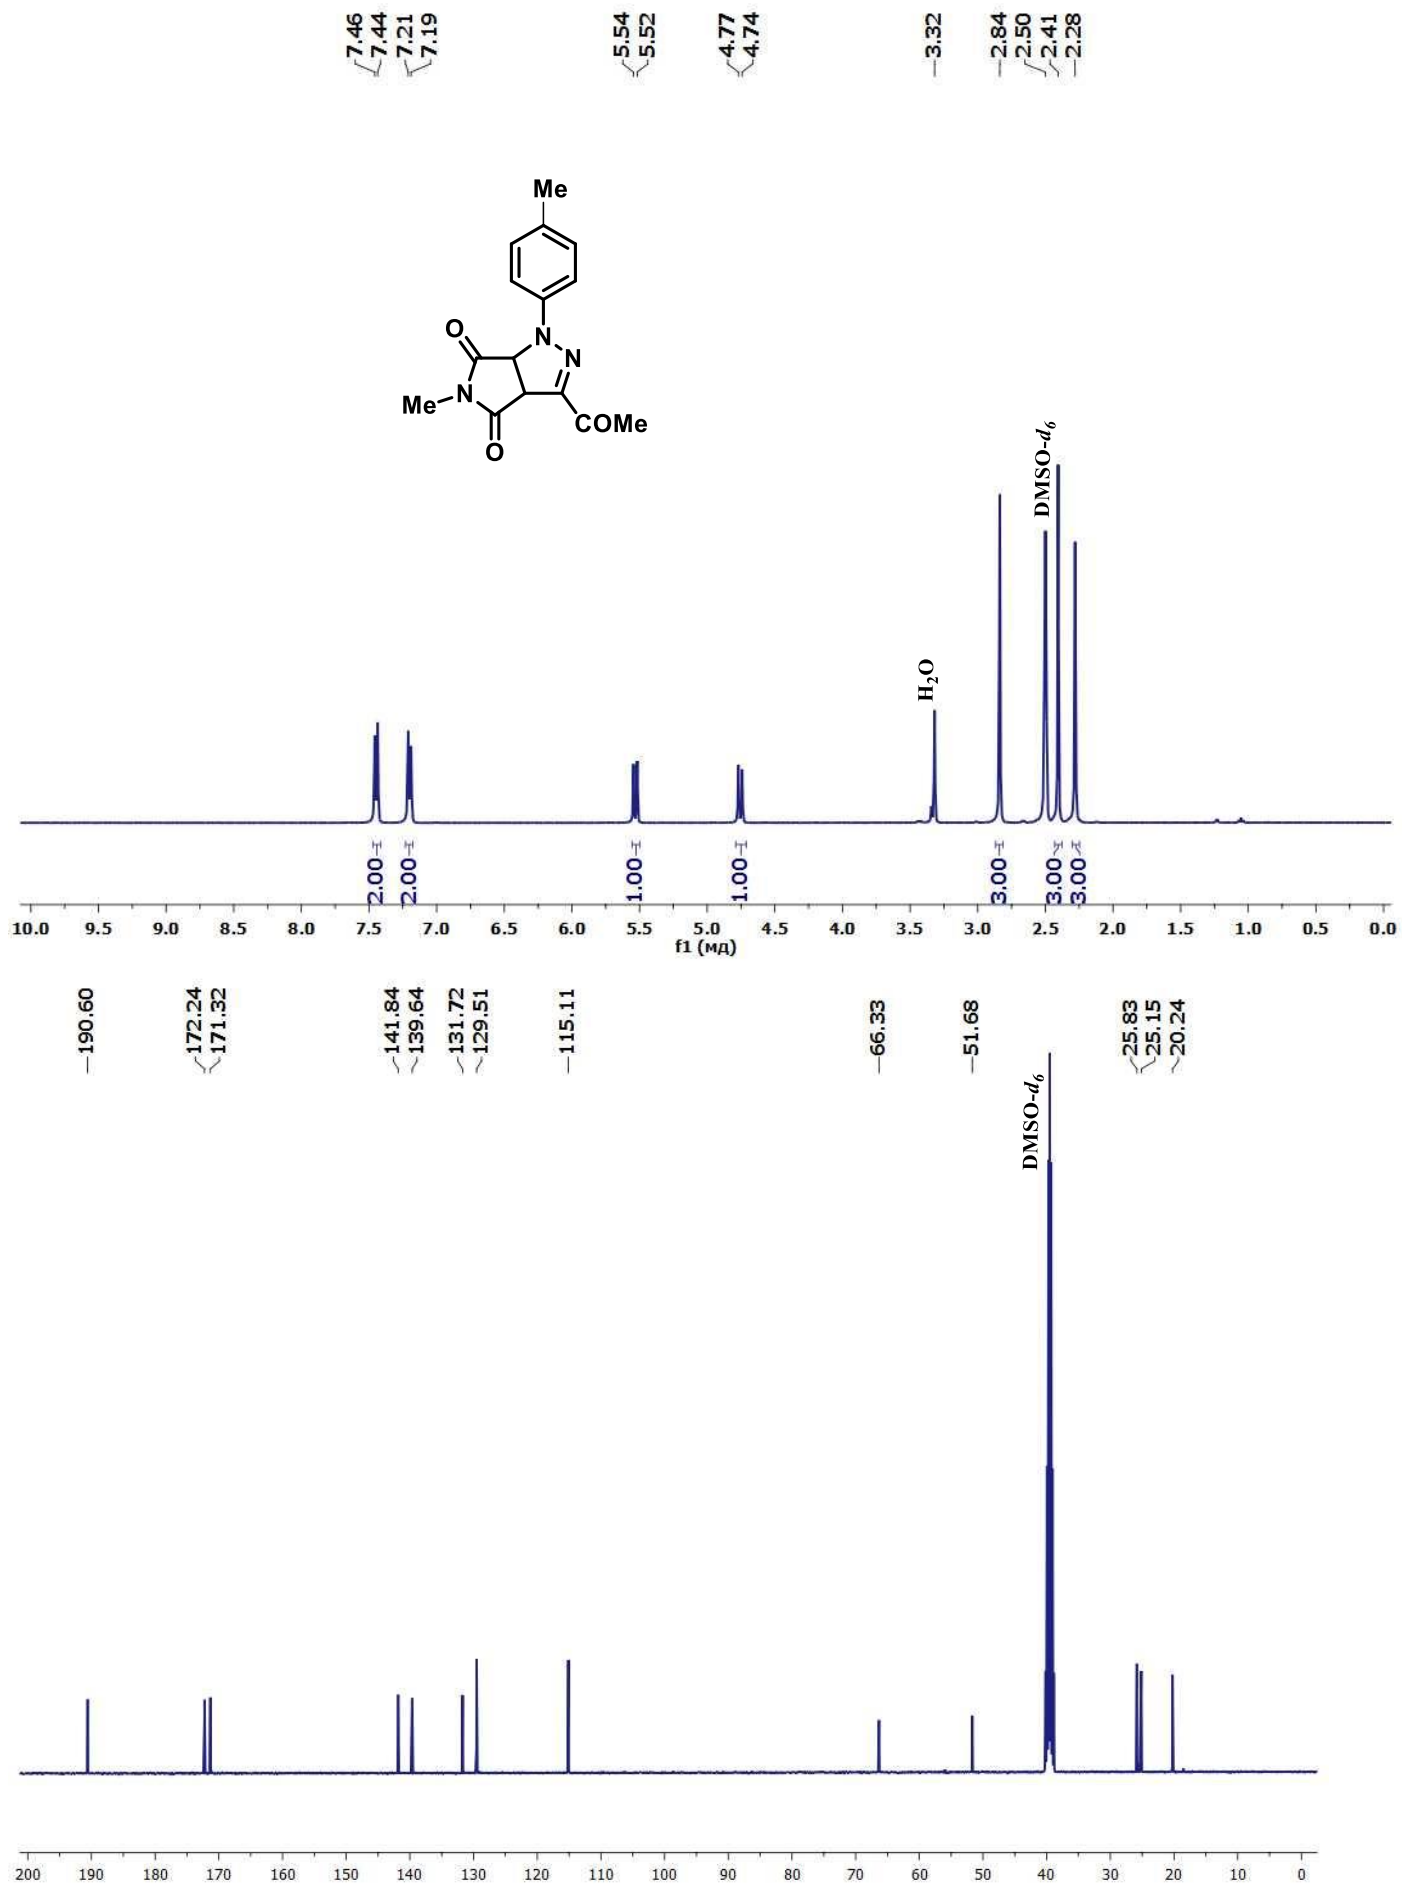

**Fig. S12.** <sup>1</sup>H NMR (400 MHz, DMSO-*d*<sub>6</sub>) and <sup>13</sup>C NMR (100 MHz, DMSO-*d*<sub>6</sub>) spectra of 3-acetyl-5-methyl-1-(*p*-tolyl)-3a,6a-dihydropyrrolo[3,4-*c*]pyrazole-4,6(1*H*,5*H*)-dione (**2i**).

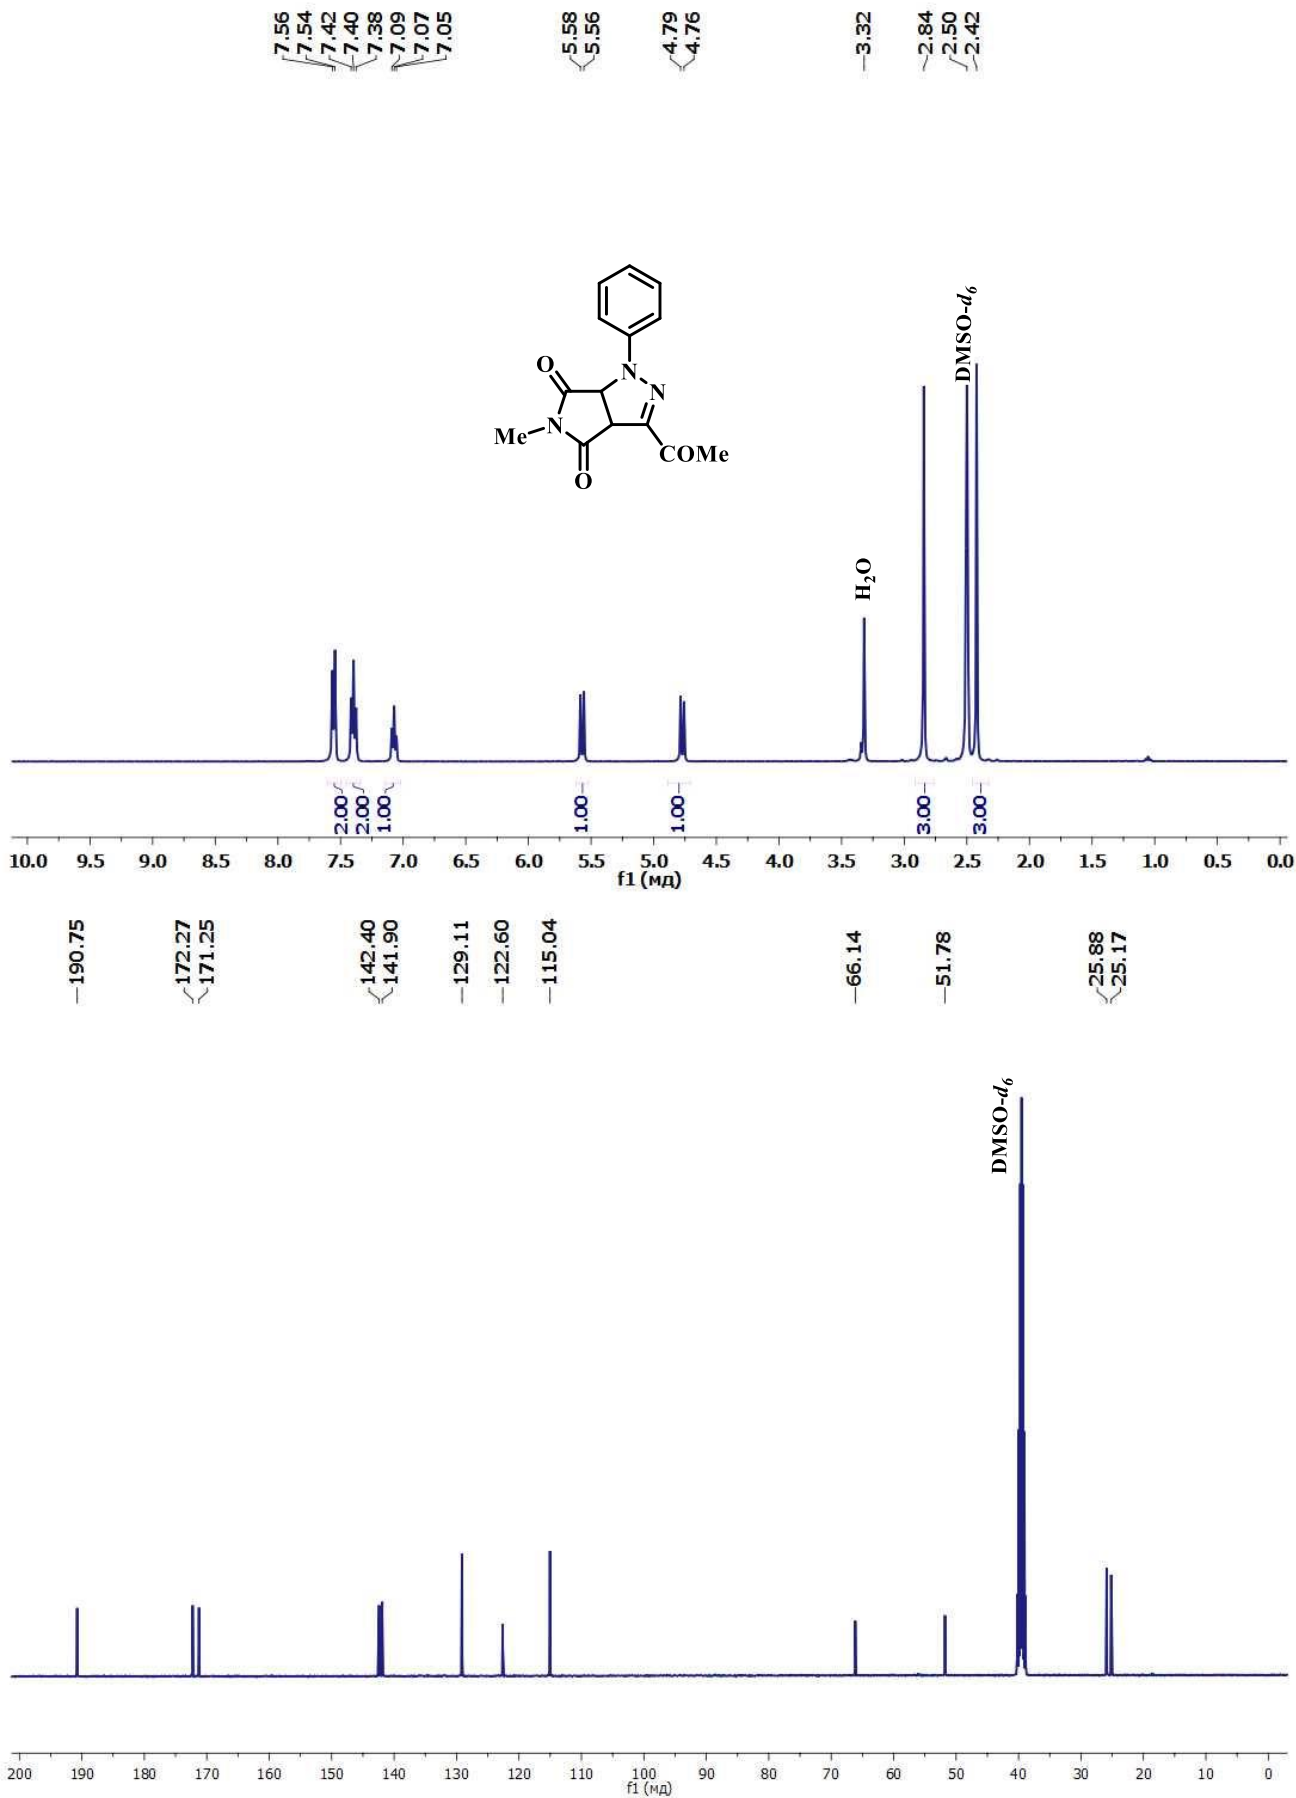

**Fig. S13.** <sup>1</sup>H NMR (400 MHz, DMSO-*d*<sub>6</sub>) and <sup>13</sup>C NMR (100 MHz, DMSO-*d*<sub>6</sub>) spectra of 3-acetyl-5-methyl-1-phenyl-3a,6a-dihydropyrrolo[3,4-*c*]pyrazole-4,6(1*H*,5*H*)-dione (**2j**).

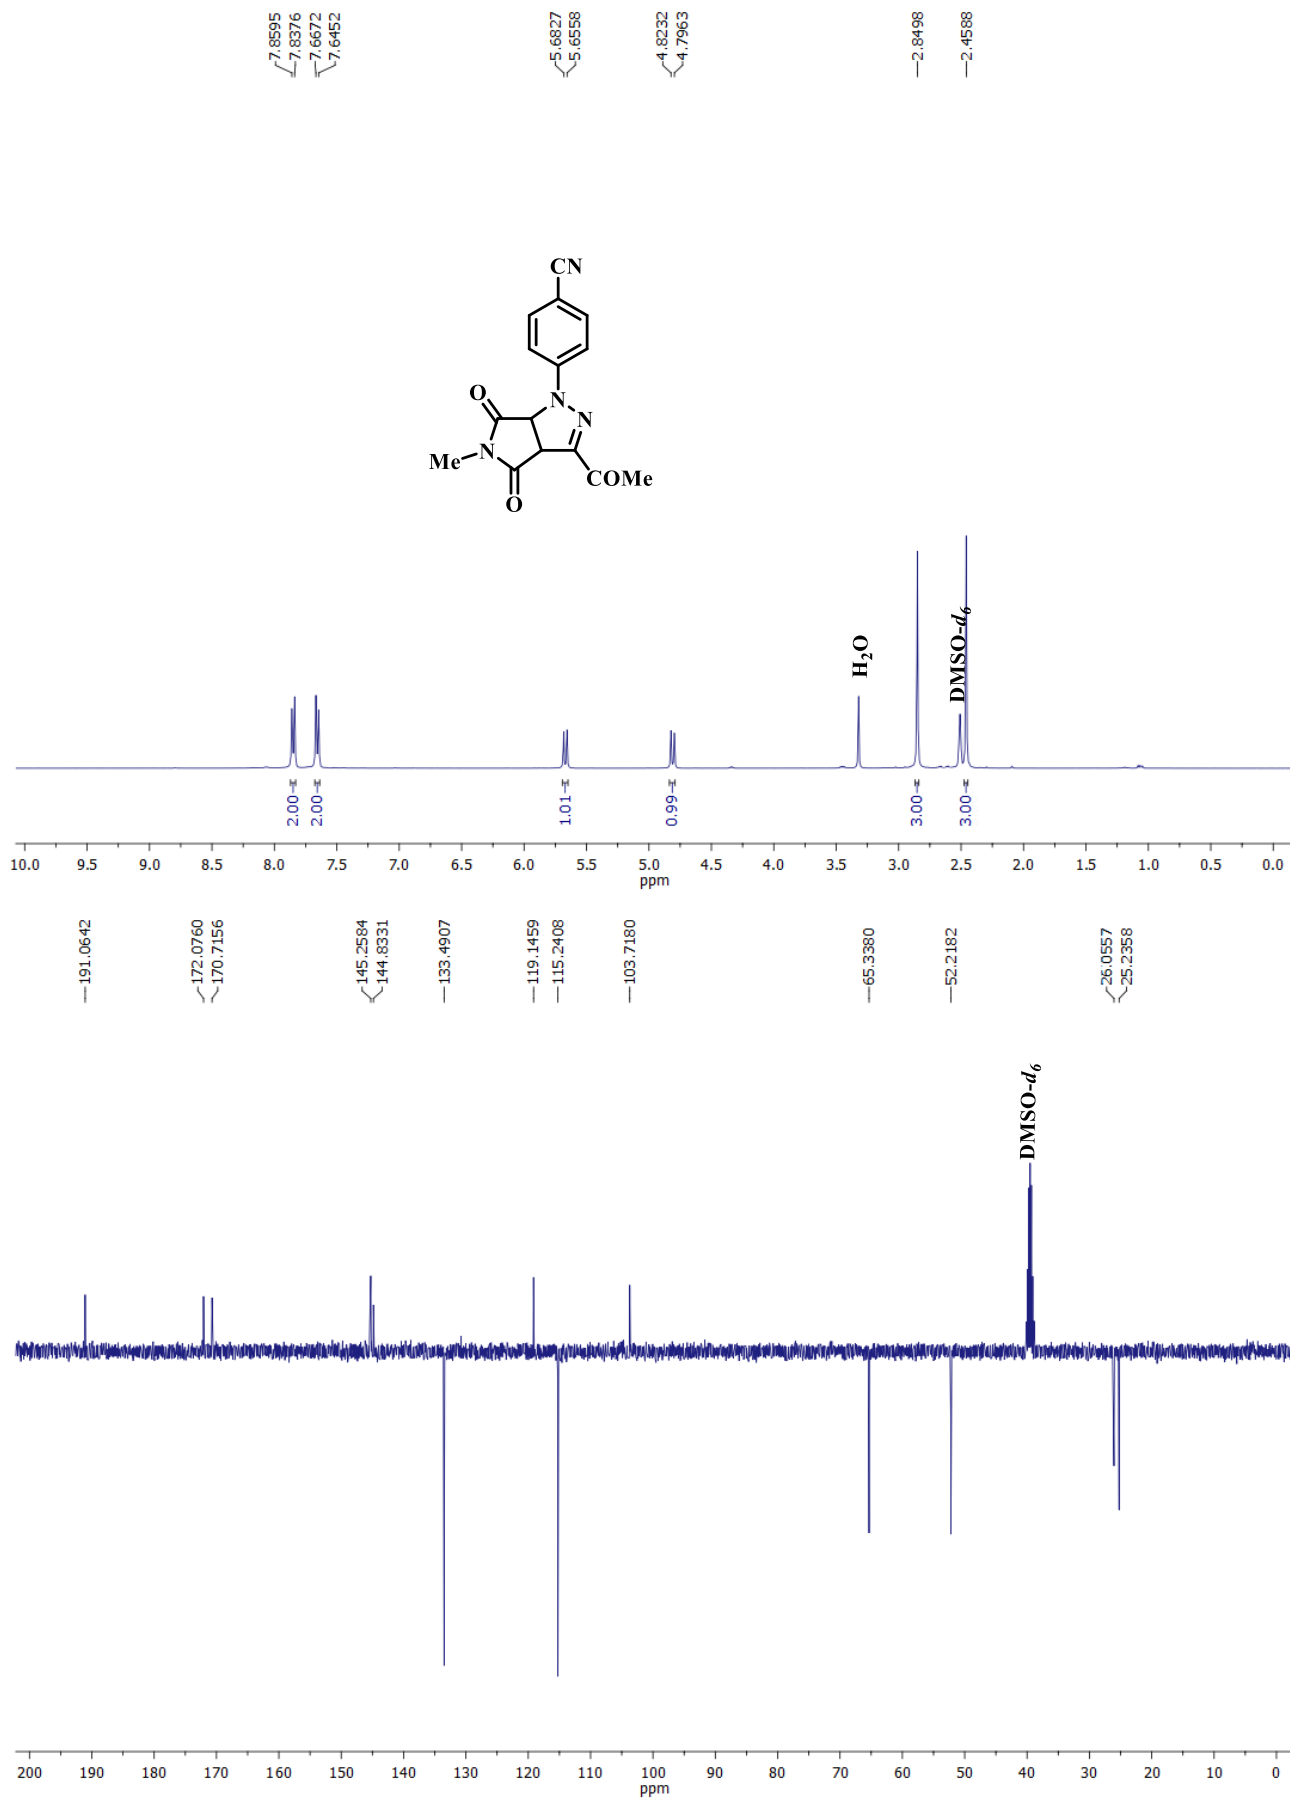

**Fig. S14.** <sup>1</sup>H NMR (400 MHz, DMSO-*d*<sub>6</sub>) and <sup>13</sup>C NMR APT (100 MHz, DMSO-*d*<sub>6</sub>) spectra of 4-(3-acetyl-5-methyl-4,6-dioxo-4,5,6a-tetrahydropyrrolo[3,4-c]pyrazol-1(3aH)-yl)benzonitrile (**2k**).

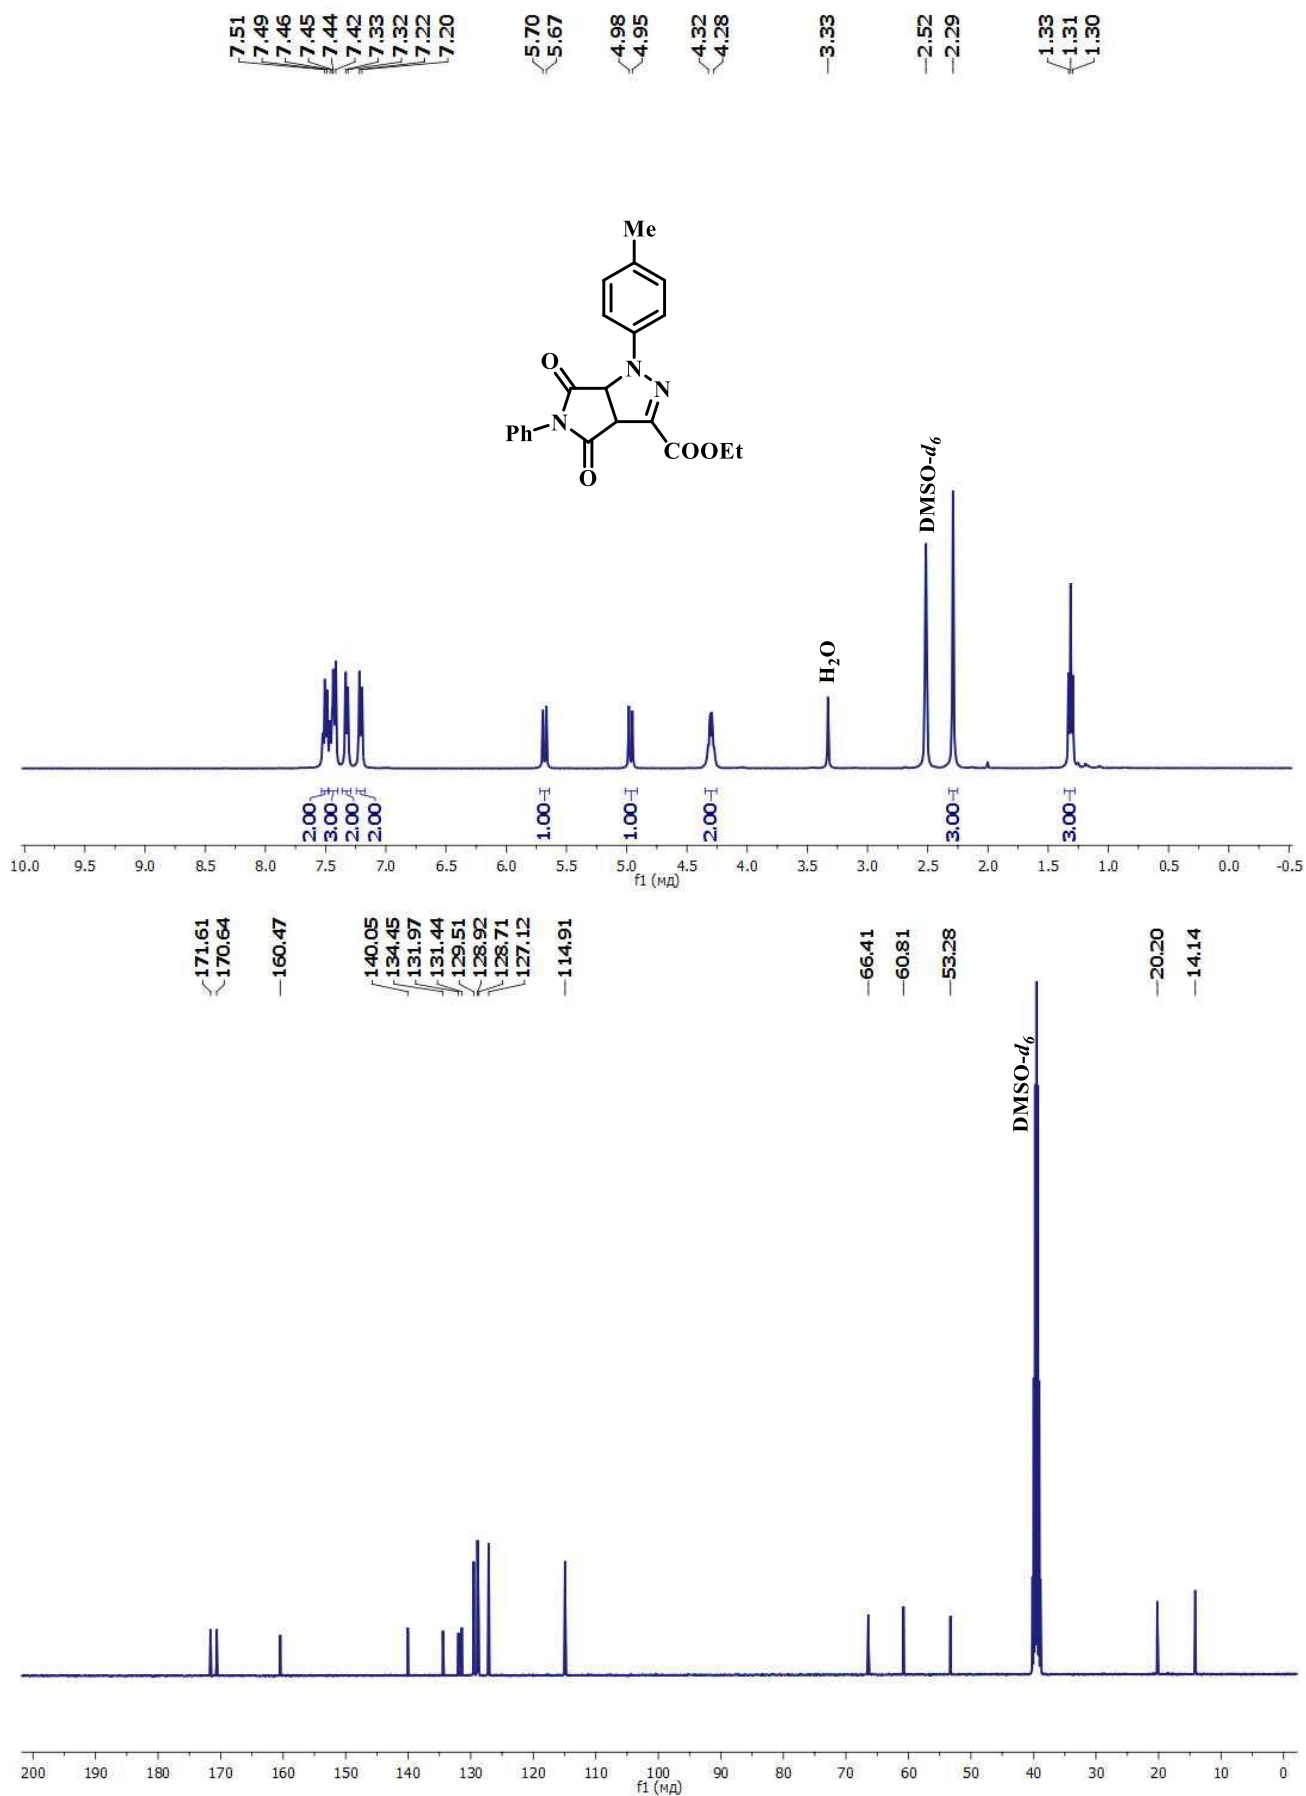

**Fig. S15.** <sup>1</sup>H NMR (400 MHz, DMSO-*d*<sub>6</sub>) and <sup>13</sup>C NMR (100 MHz, DMSO-*d*<sub>6</sub>) spectra of ethyl 4,6-dioxo-5-phenyl-1-(*p*-tolyl)-1,3a,4,5,6,6a-hexahydropyrrolo[3,4-*c*]pyrazole-3-carboxylate (**3a**).

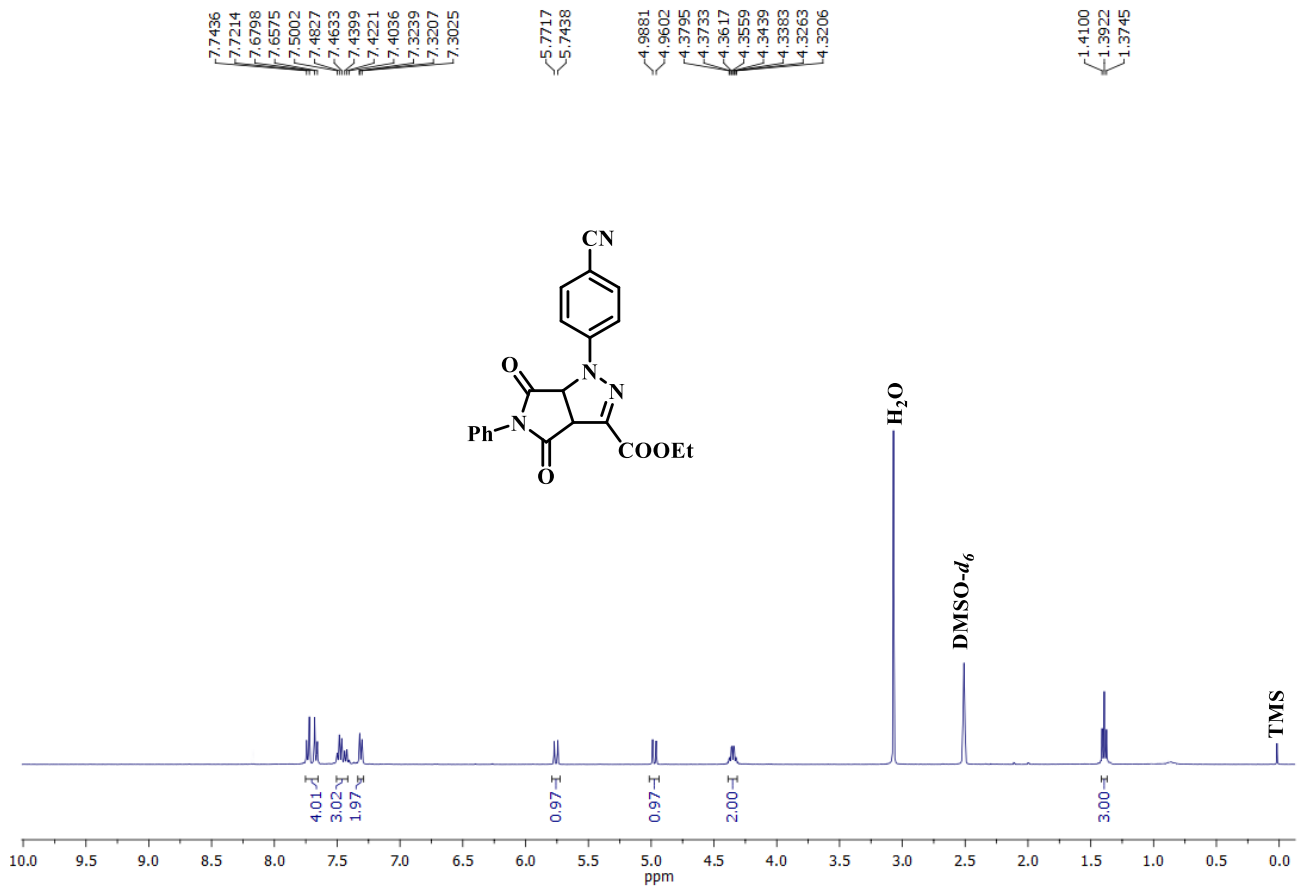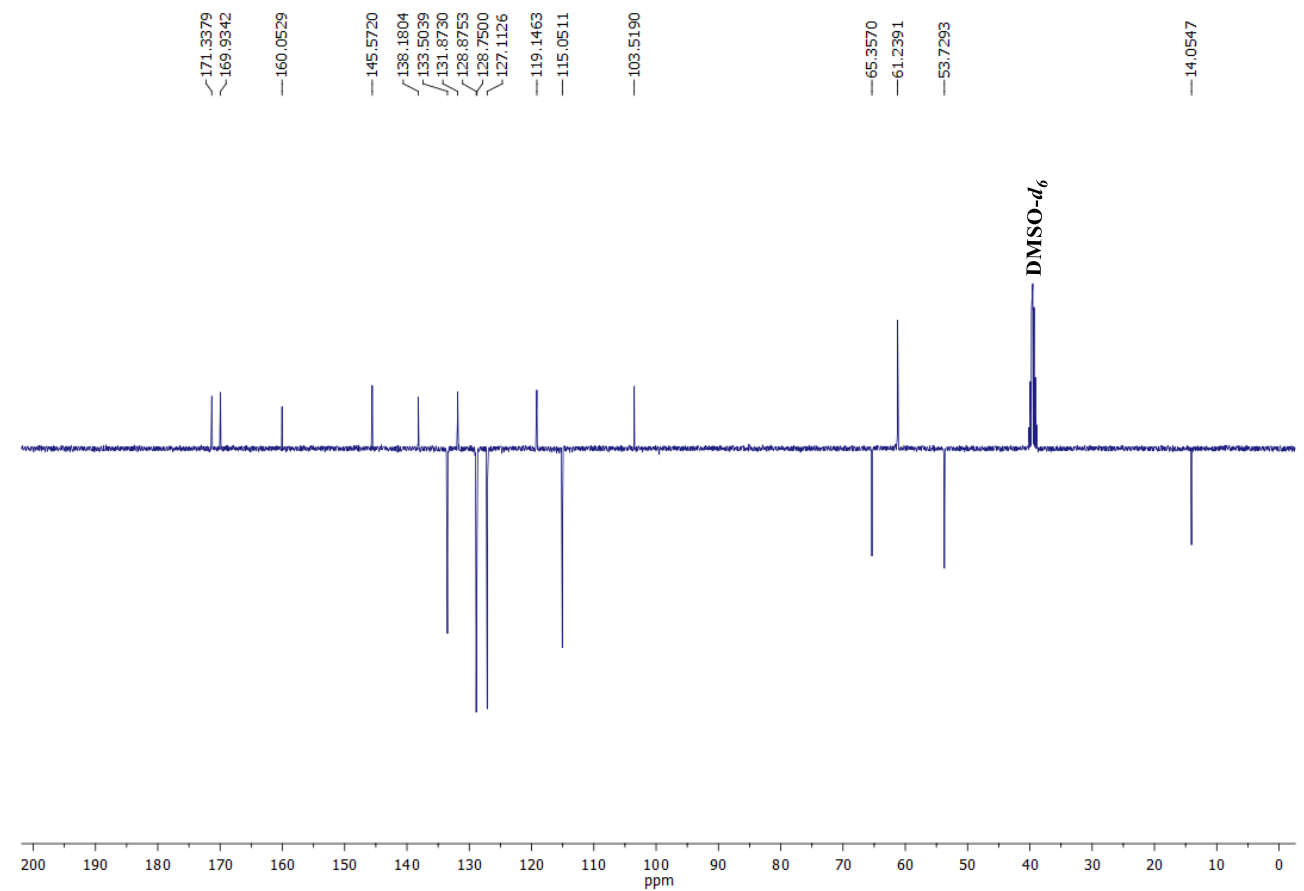



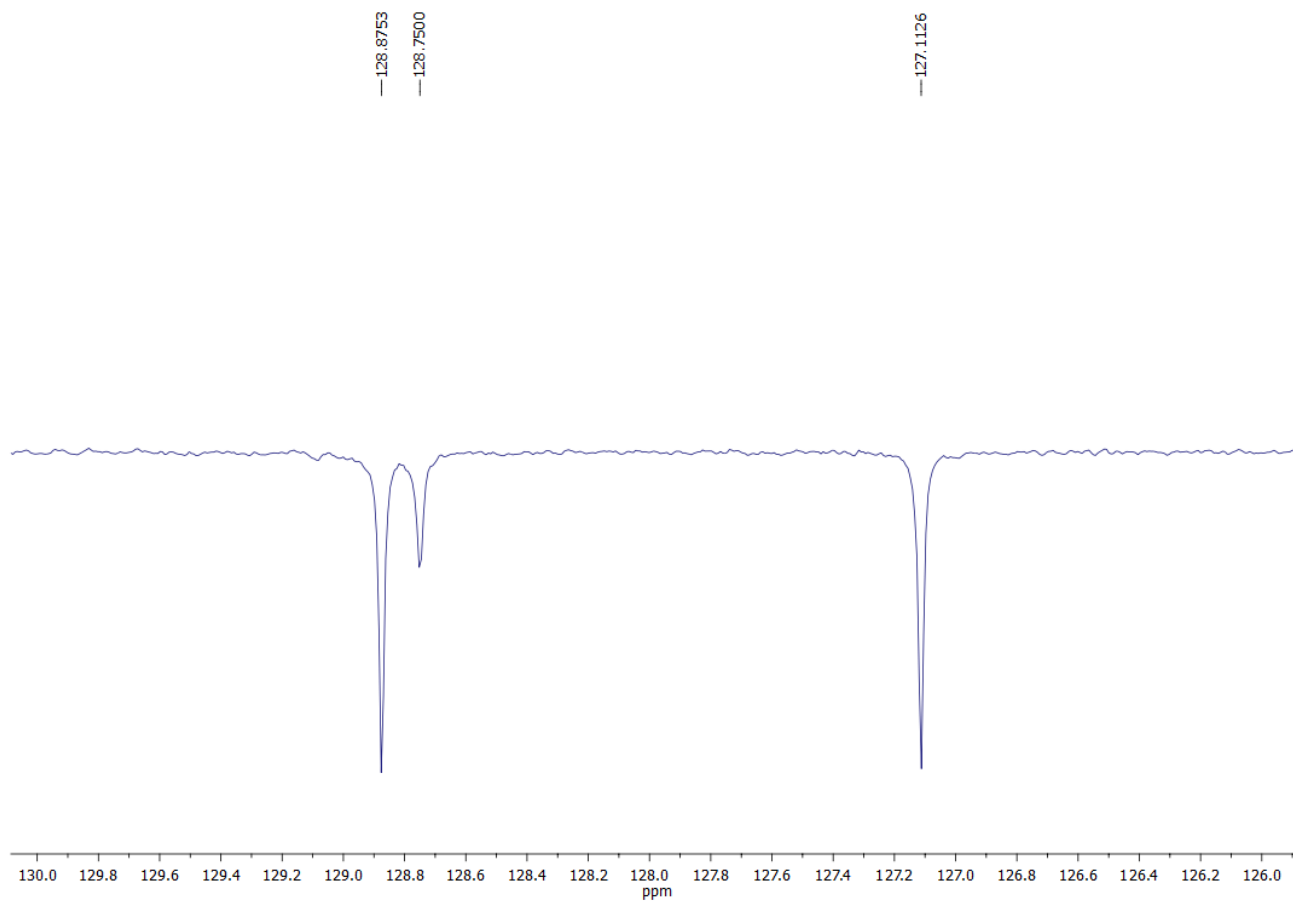

**Fig. S16.**  $^1\text{H}$  NMR (400 MHz,  $\text{DMSO-}d_6$ , TMS) and  $^{13}\text{C}$  NMR APT (100 MHz,  $\text{DMSO-}d_6$ ) spectra of ethyl 1-(4-cyanophenyl)-4,6-dioxo-5-phenyl-1,3*a*,4,5,6,6*a*-hexahydropyrrolo[3,4-*c*]pyrazole-3-carboxylate (**3b**).

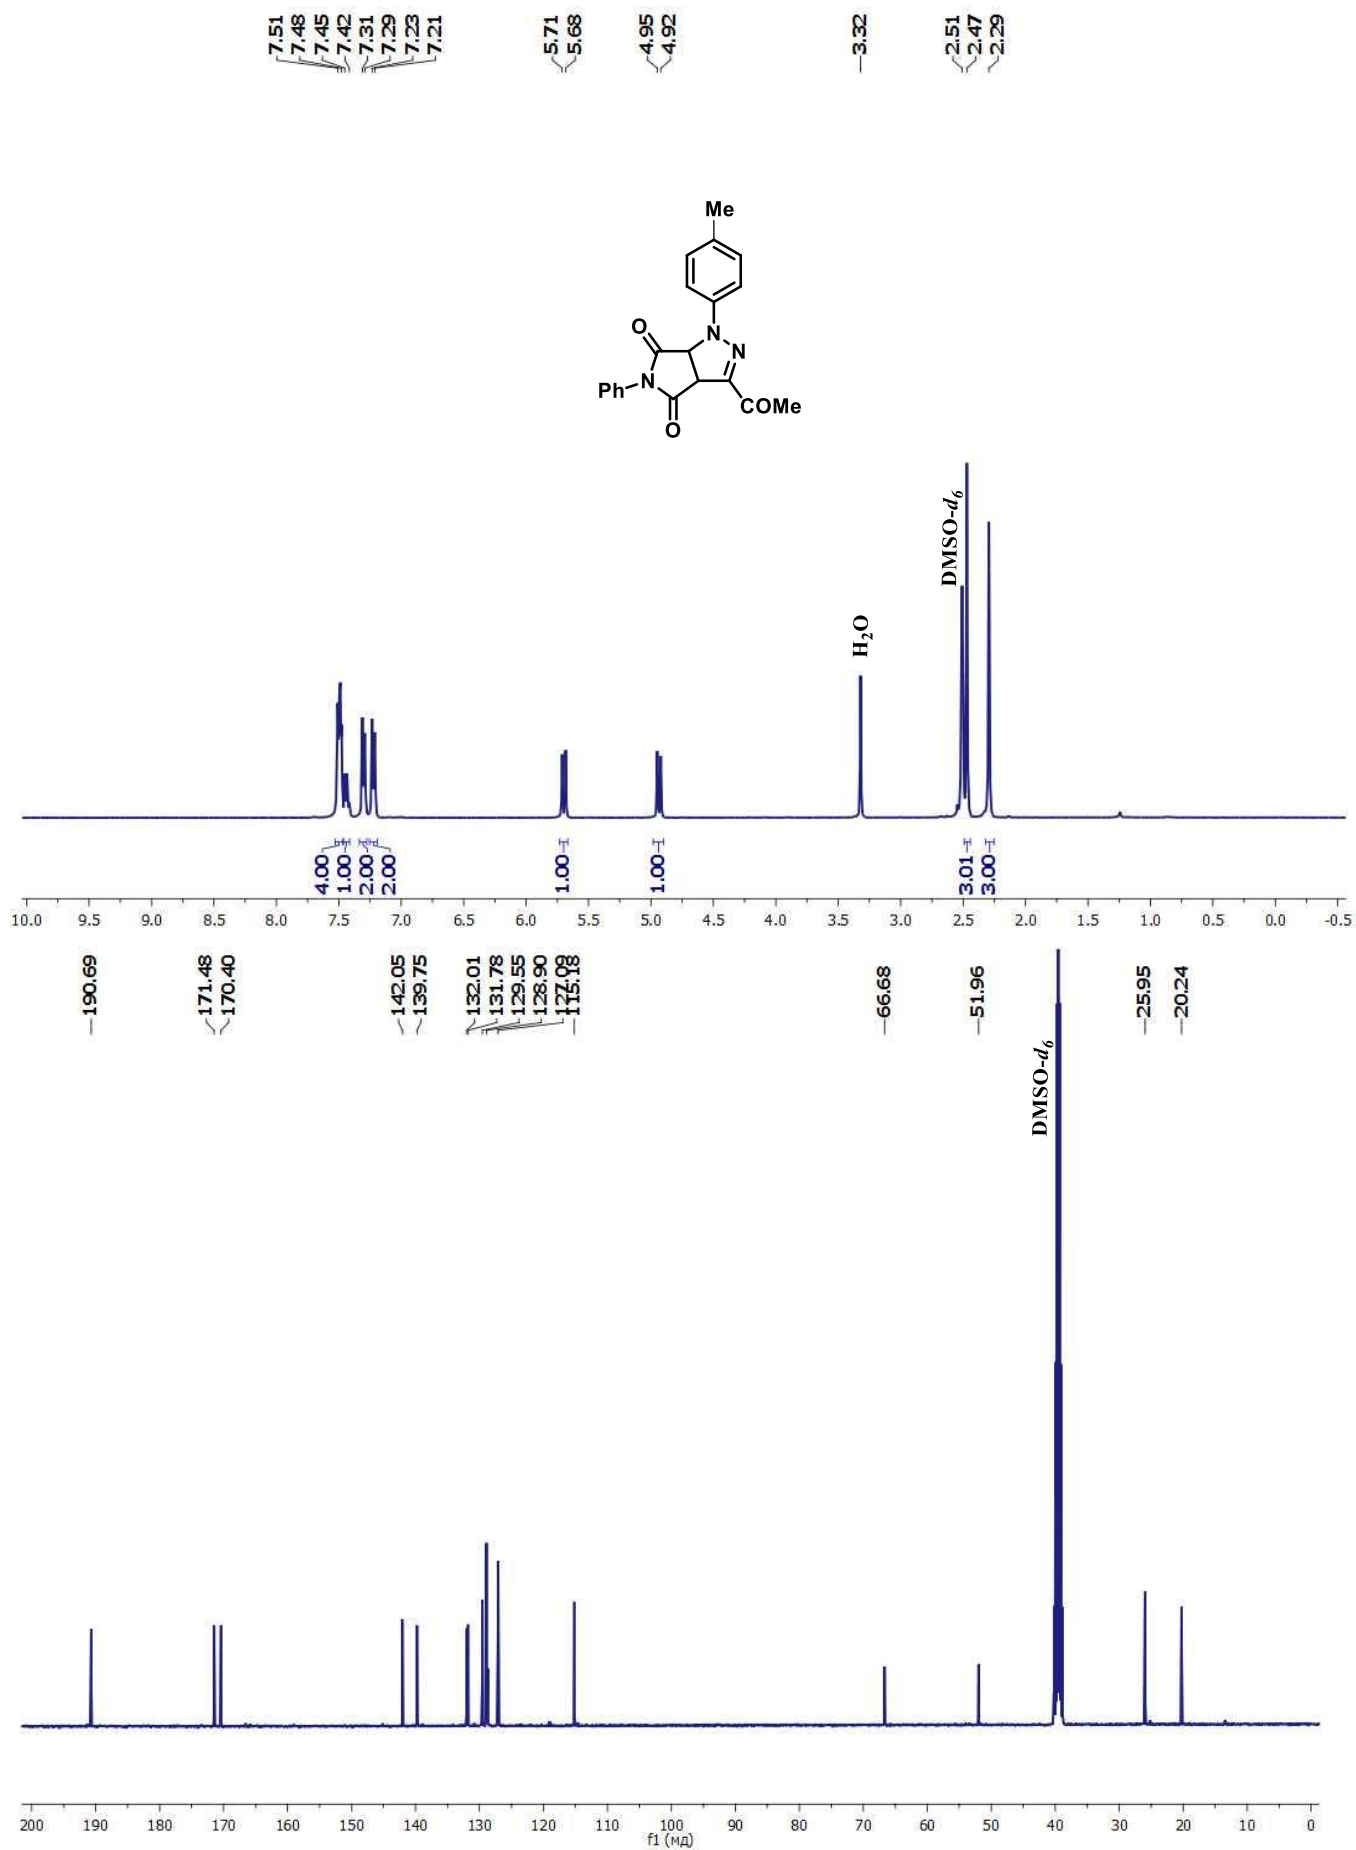

**Fig. S17.** <sup>1</sup>H NMR (400 MHz, DMSO-*d*<sub>6</sub>) and <sup>13</sup>C NMR (100 MHz, DMSO-*d*<sub>6</sub>) spectra of 3-acetyl-5-phenyl-1-(*p*-tolyl)-3a,6a-dihydropyrrolo[3,4-*c*]pyrazole-4,6(1*H*,5*H*)-dione (**3c**).

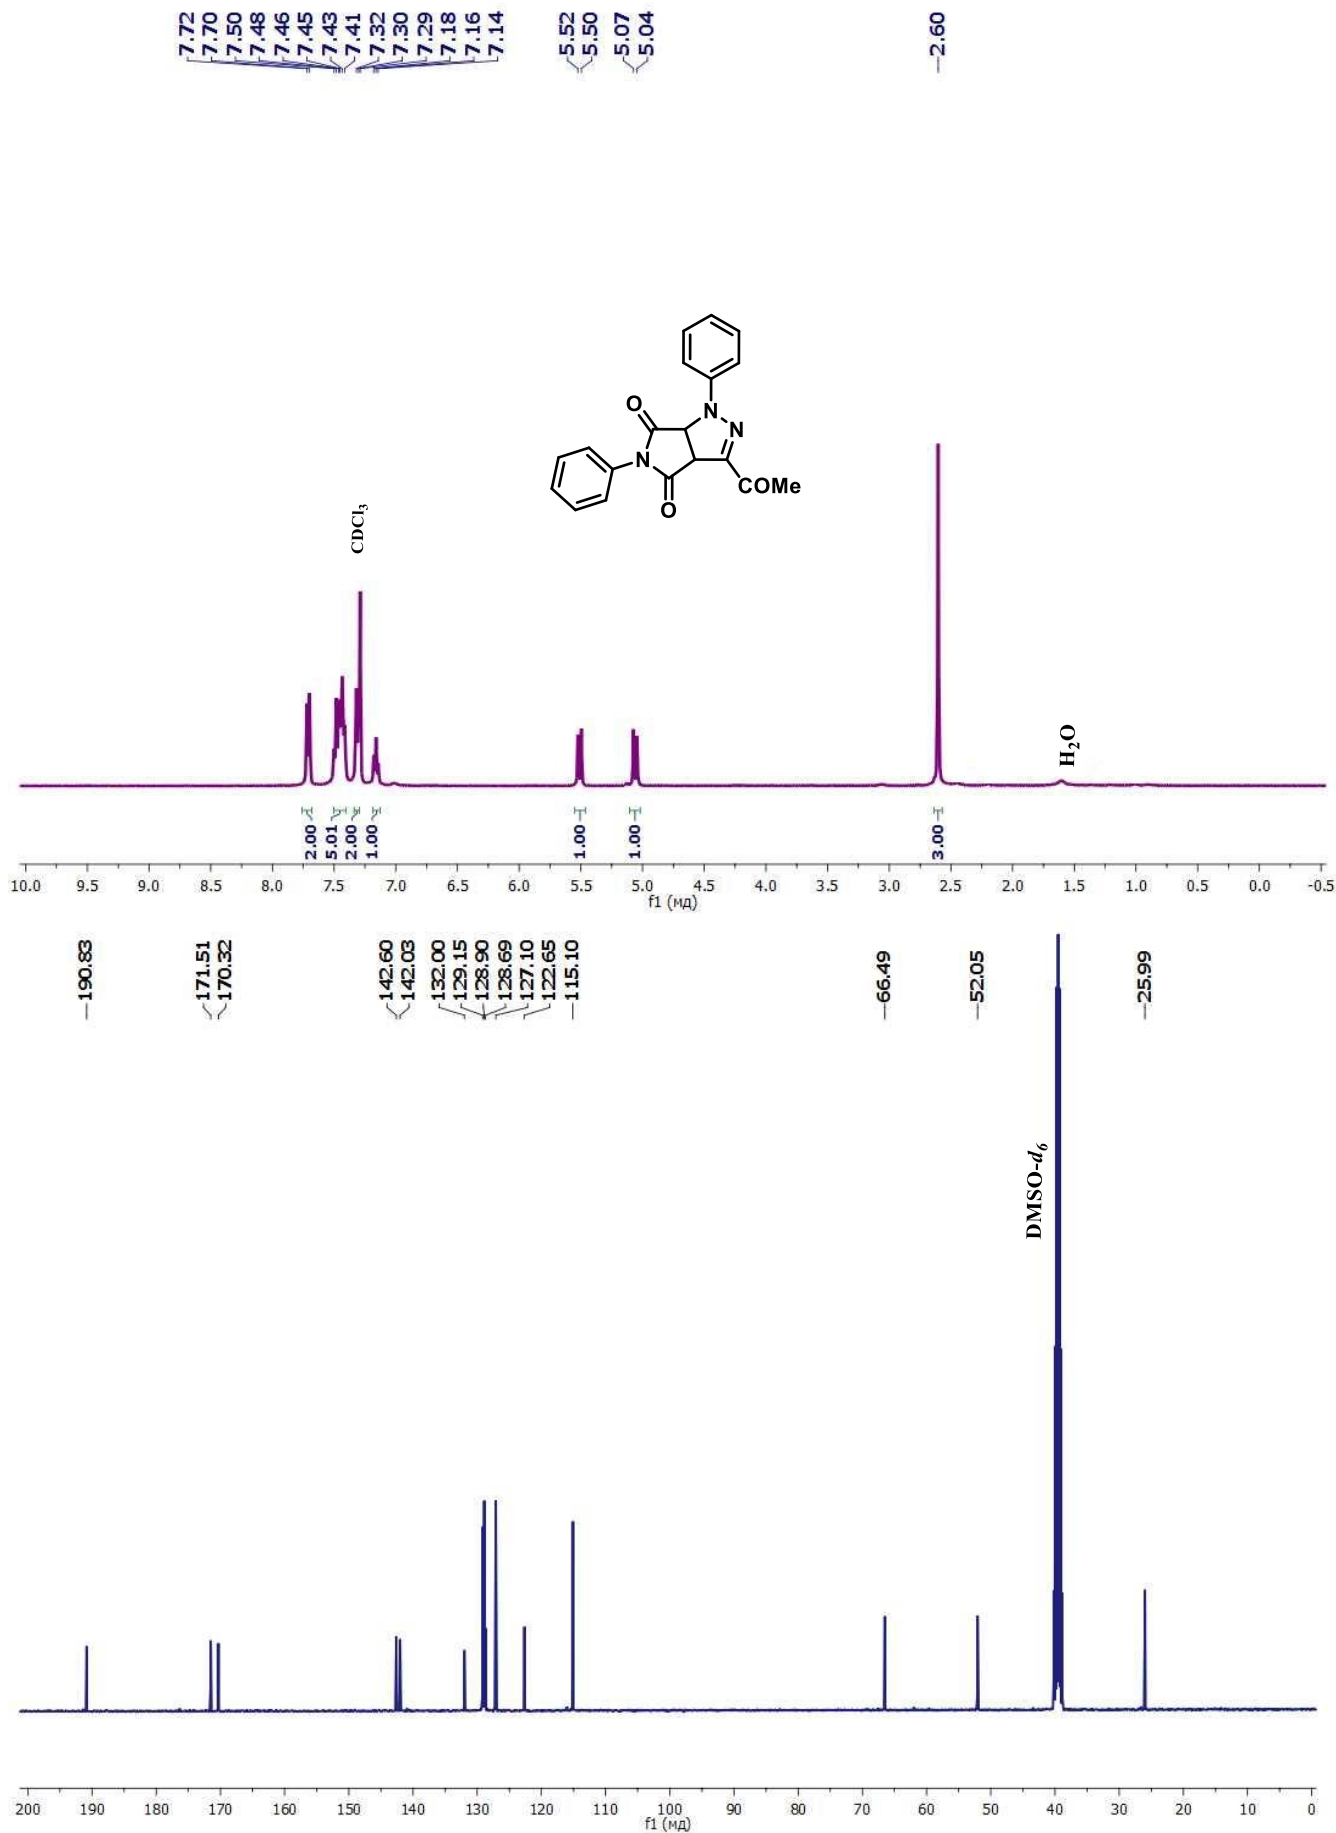

**Fig. S18.** <sup>1</sup>H NMR (400 MHz, CDCl<sub>3</sub>) and <sup>13</sup>C NMR (100 MHz, DMSO-*d*<sub>6</sub>) spectra of 3-acetyl-1,5-diphenyl-3a,6a-dihydropyrrolo[3,4-c]pyrazole-4,6(1*H*,5*H*)-dione (**3d**).

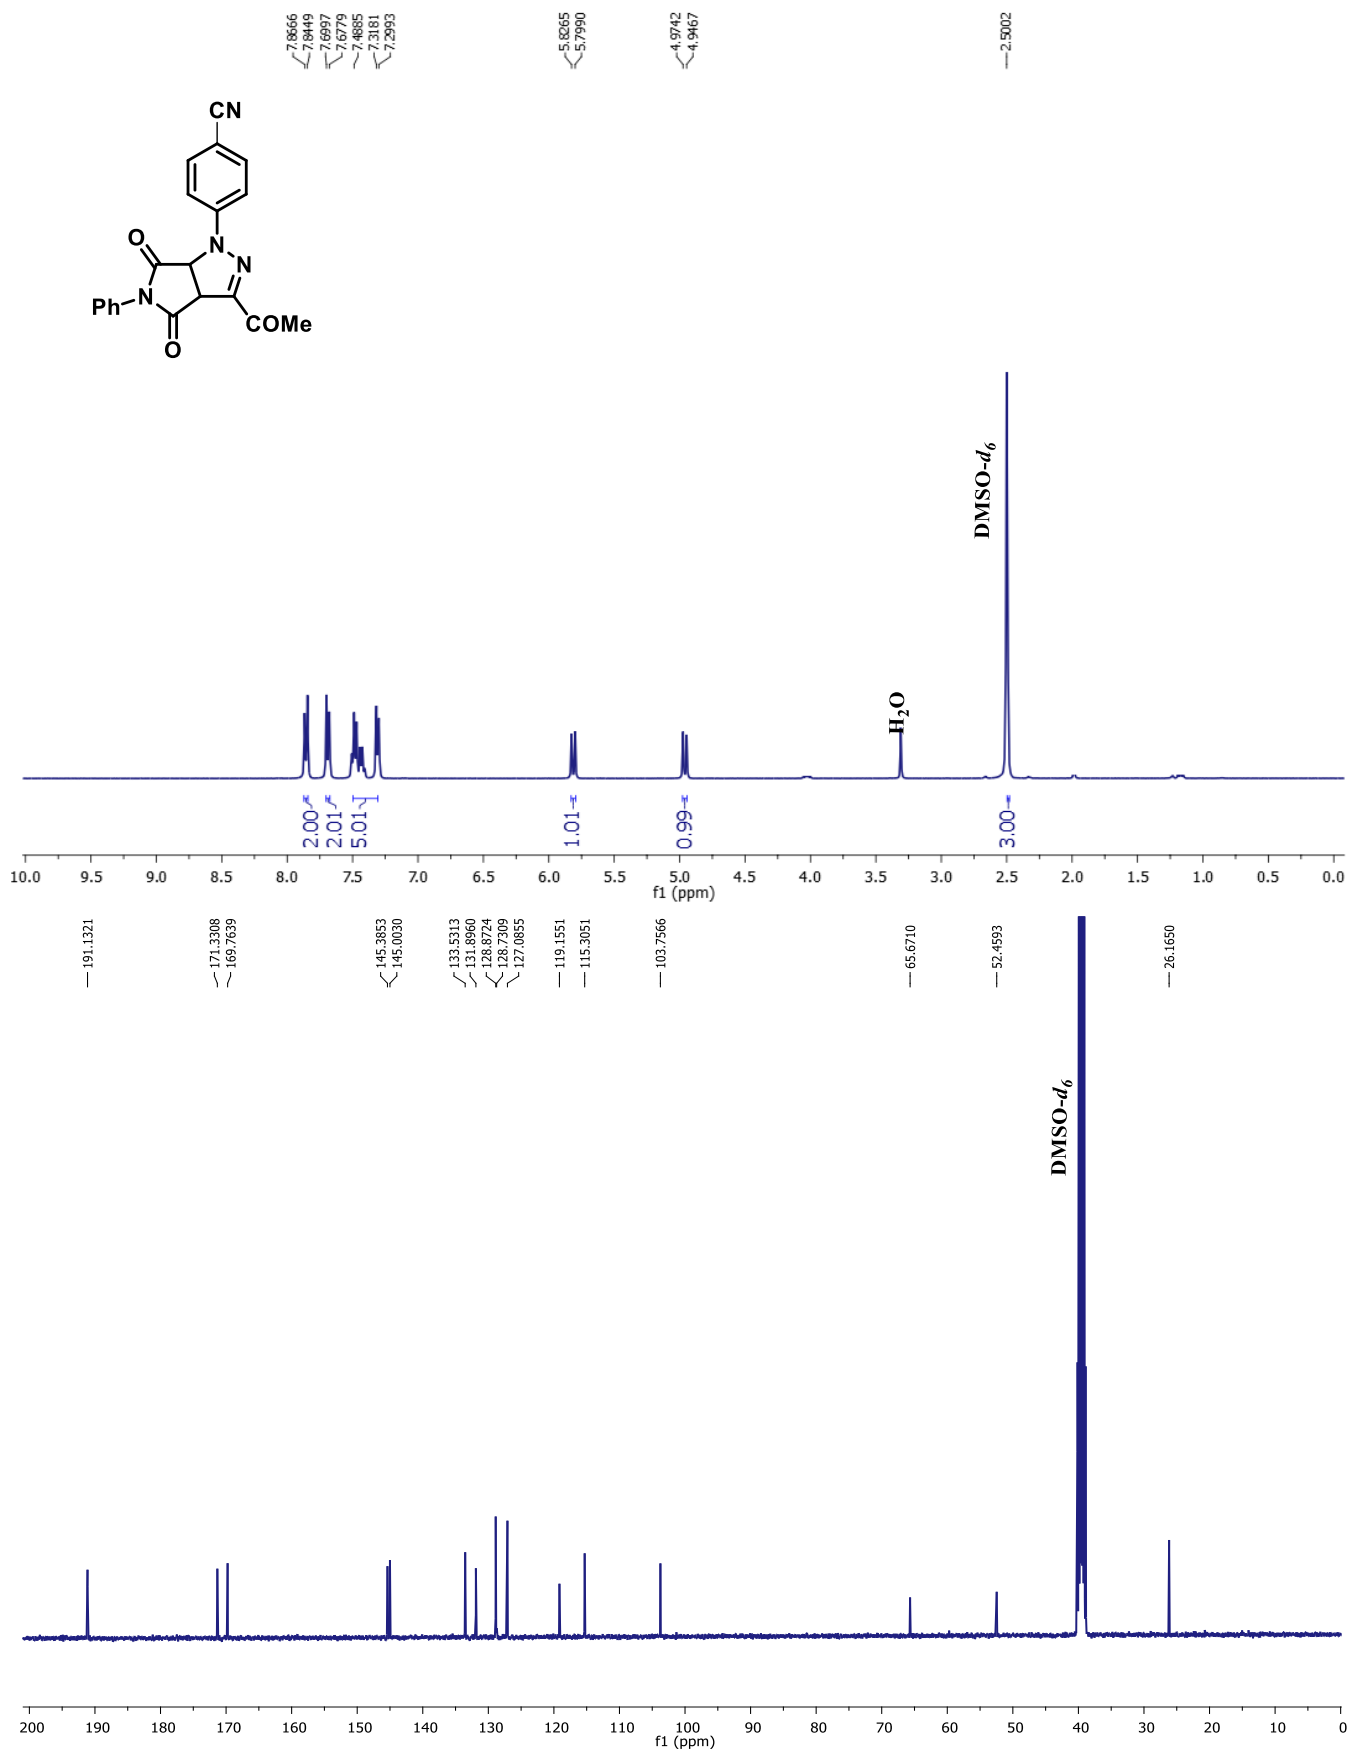

**Fig. S19.** <sup>1</sup>H NMR (400 MHz, DMSO-*d*<sub>6</sub>) and <sup>13</sup>C NMR (100 MHz, DMSO-*d*<sub>6</sub>) spectra of (3-acetyl-4,6-dioxo-5-phenyl-4,5,6,6a-tetrahydropyrrolo[3,4-c]pyrazol-1(3aH)-yl)benzotrile (**3e**).

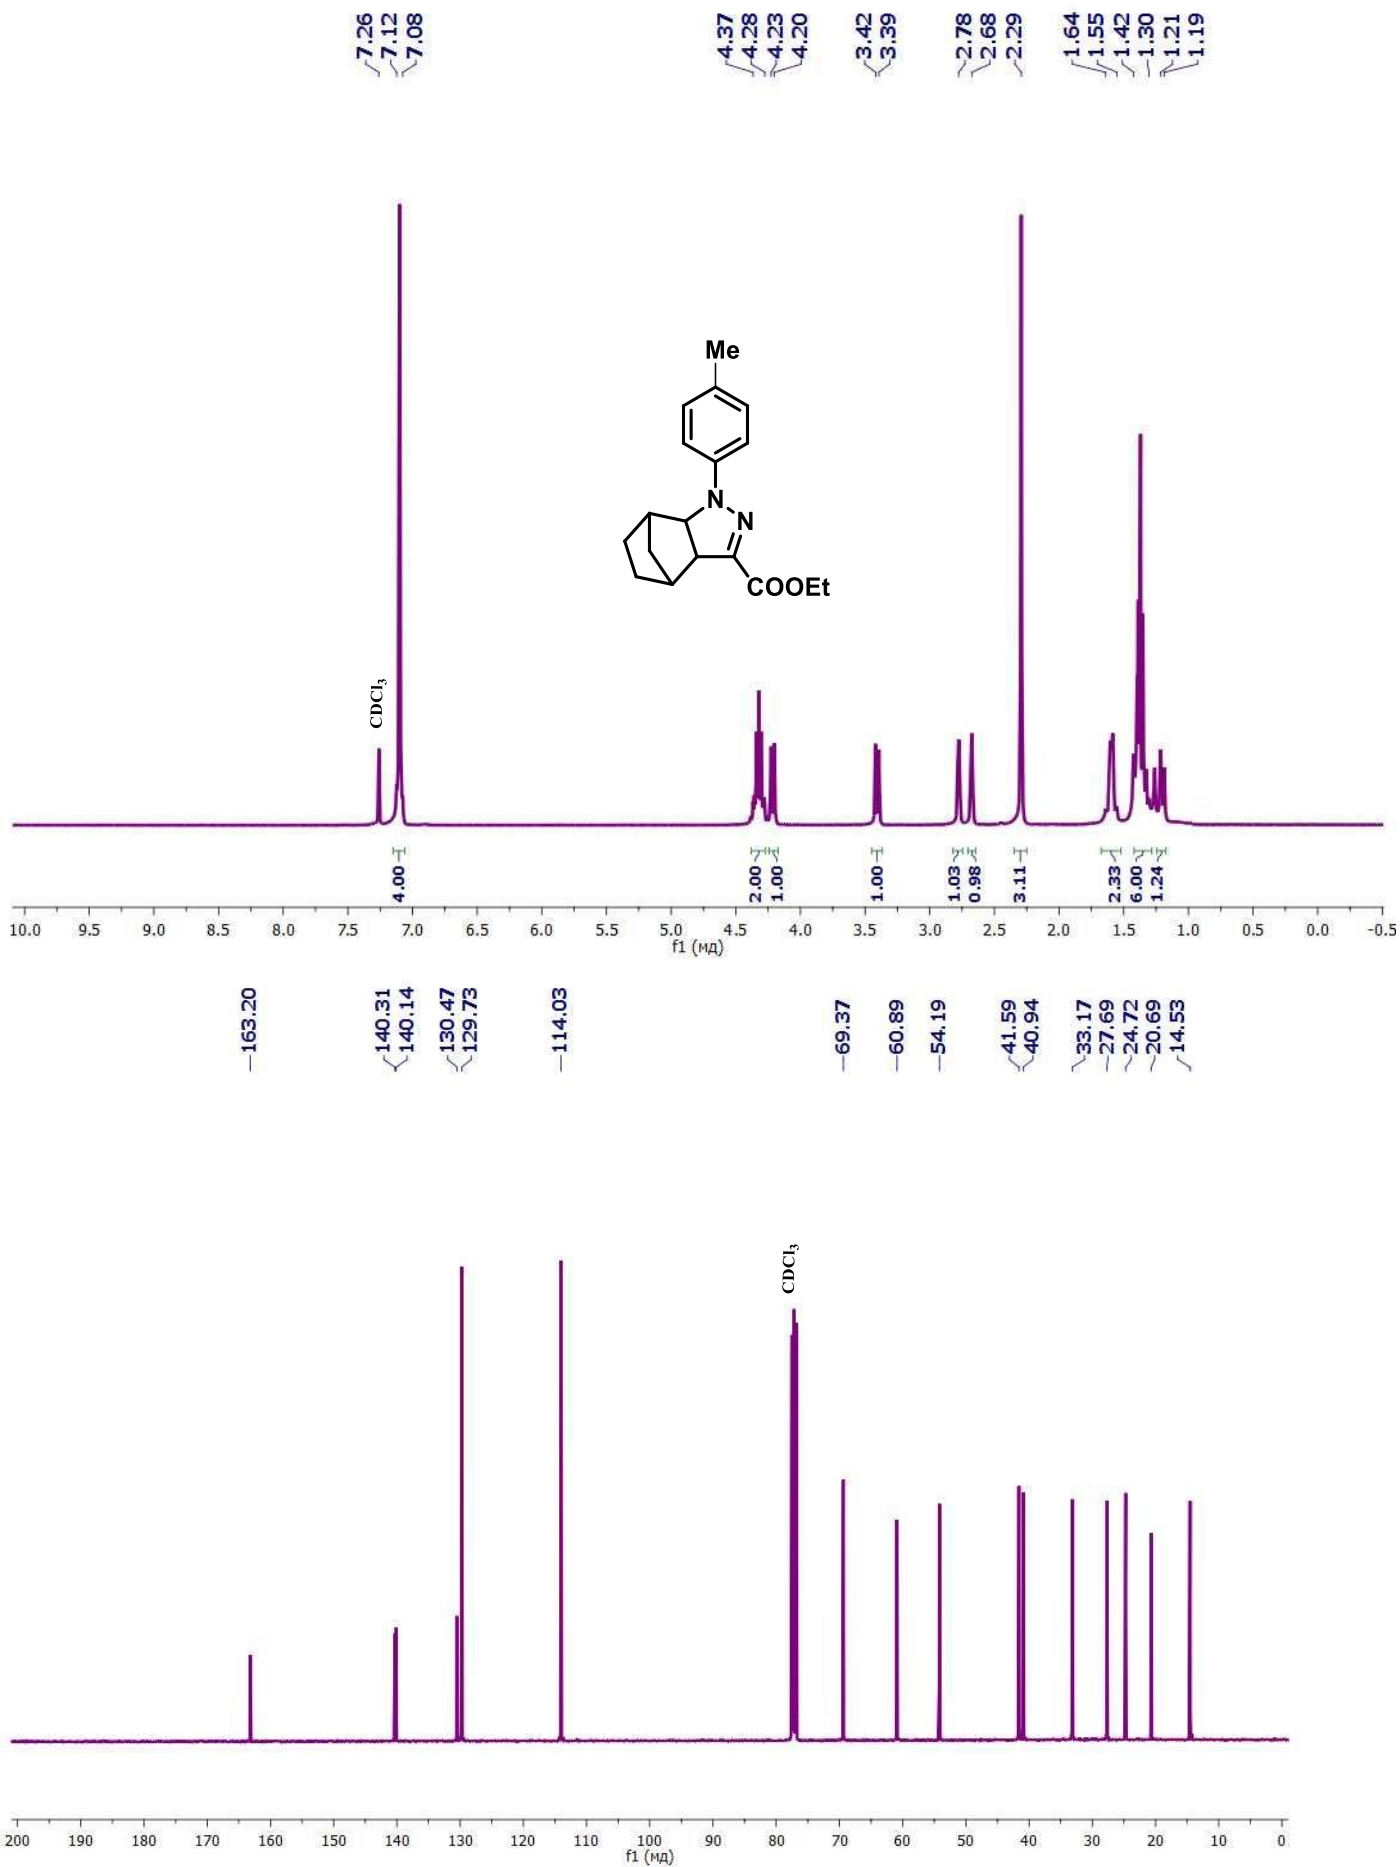

**Fig. S20.** <sup>1</sup>H NMR (400 MHz, DMSO-*d*<sub>6</sub>) and <sup>13</sup>C NMR (100 MHz, CDCl<sub>3</sub>) spectra of ethyl 1-(*p*-tolyl)-3a,4,5,6,7,7a-hexahydro-1H-4,7-methanoindazole-3-carboxylate (**4a**).

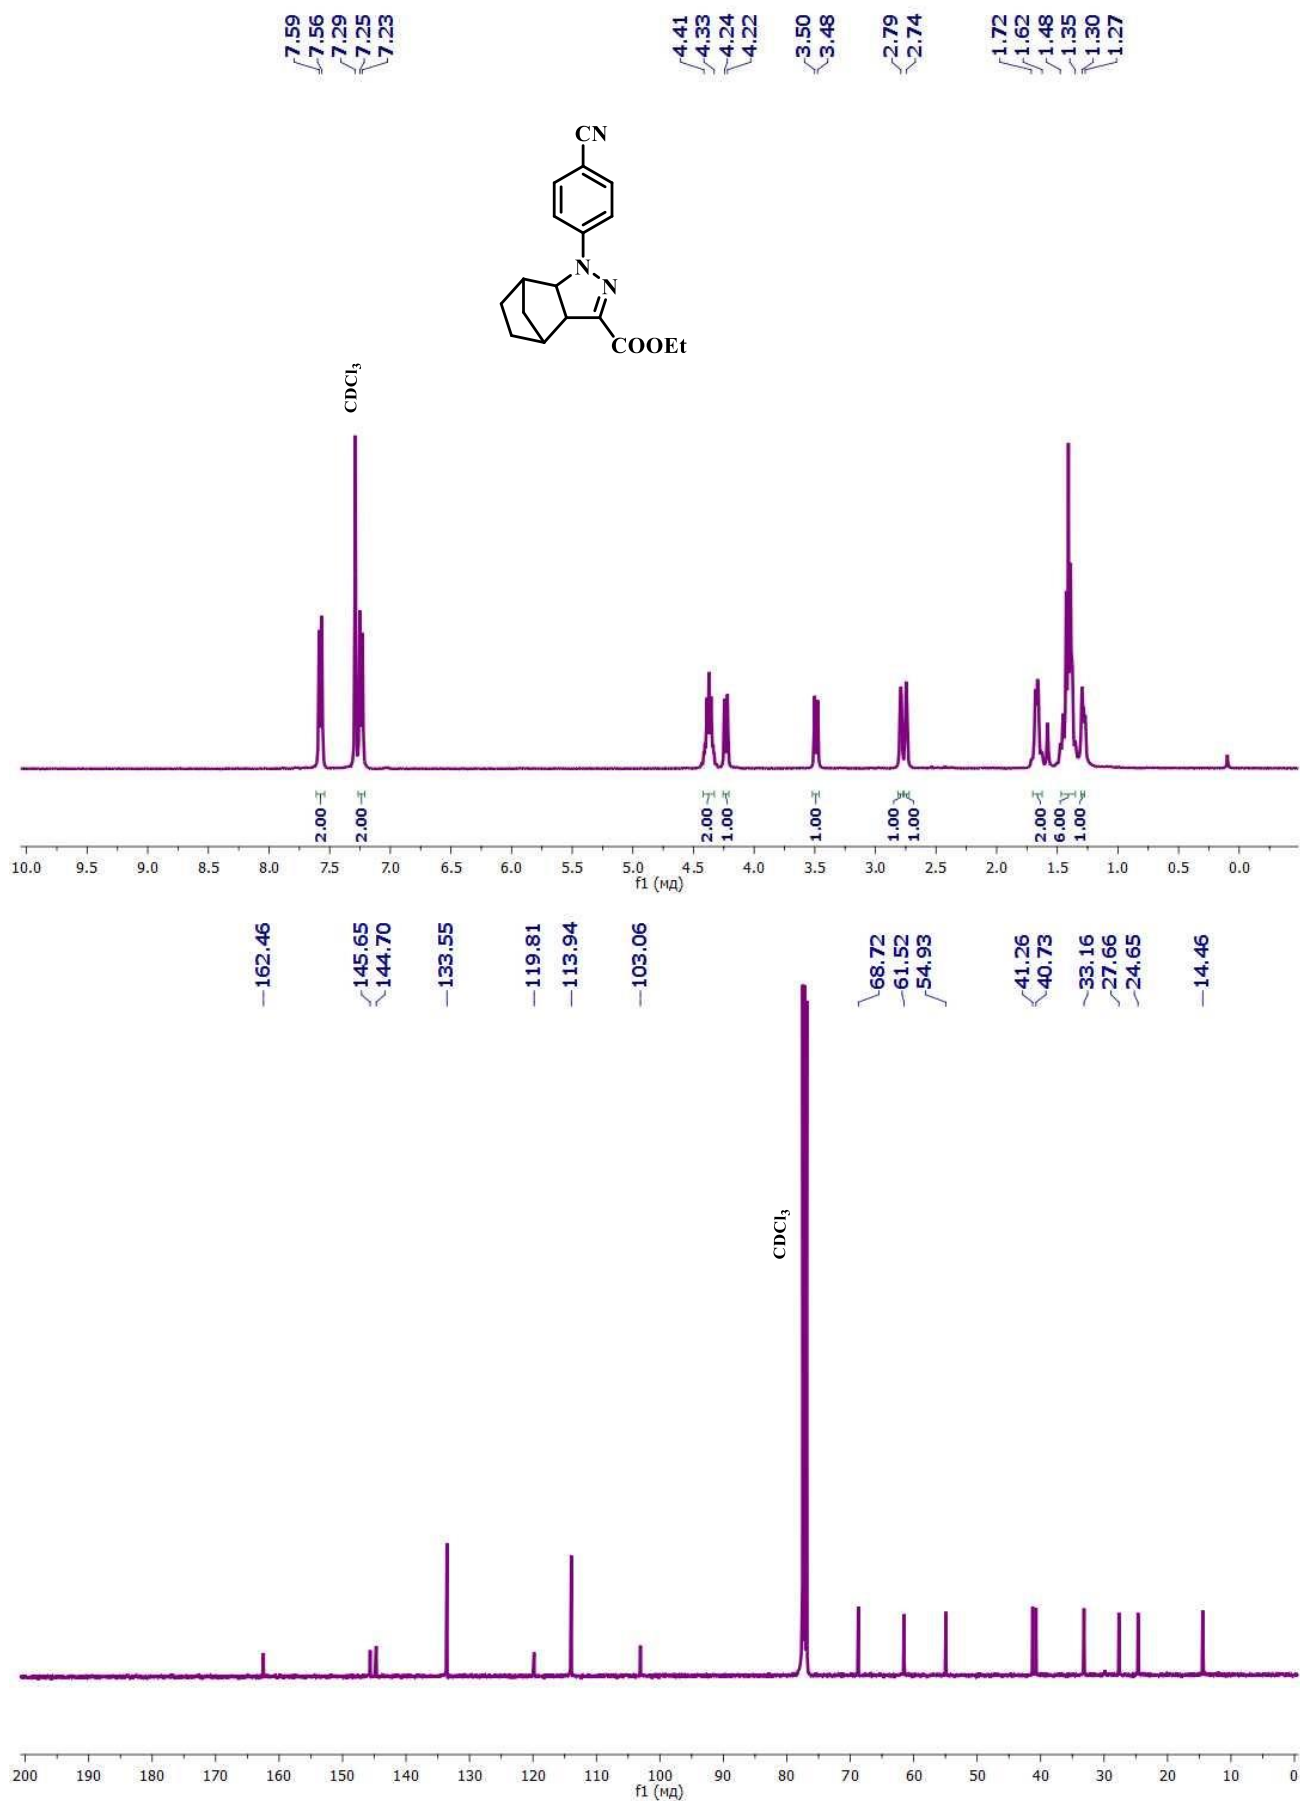

**Fig. S21.** <sup>1</sup>H NMR (400 MHz, CDCl<sub>3</sub>, TMS) and <sup>13</sup>C NMR (100 MHz, CDCl<sub>3</sub>) spectra of ethyl 1-(4-cyanophenyl)-3a,4,5,6,7,7a-hexahydro-1H-4,7-methanoindazole-3-carboxylate (**4b**).

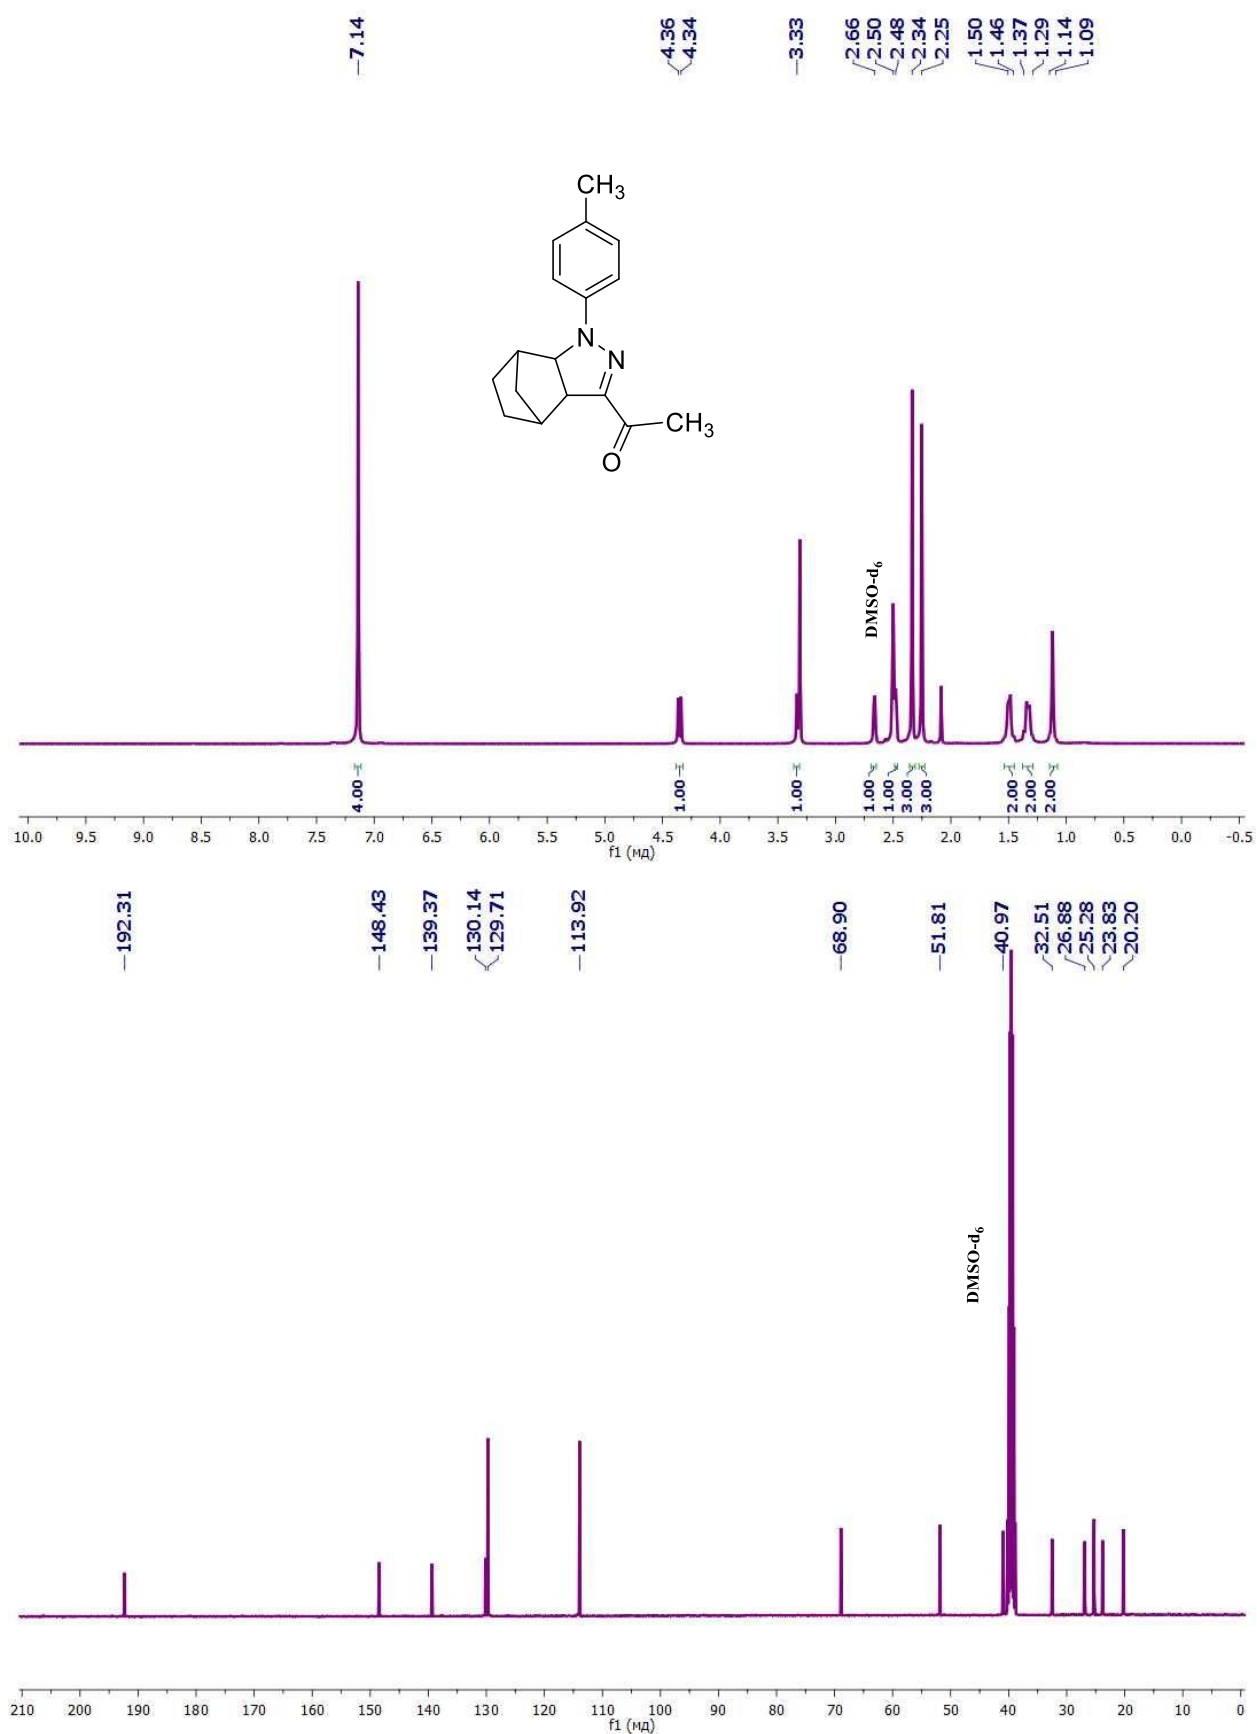

**Fig. S22.** <sup>1</sup>H NMR (400 MHz, DMSO-*d*<sub>6</sub>) and <sup>13</sup>C NMR (100 MHz, DMSO-*d*<sub>6</sub>) spectra of 1-(1-tolyl-3a,4,5,6,7,7a-hexahydro-1H-4,7-methanoindazol-3-yl)ethan-1-one (**4c**)

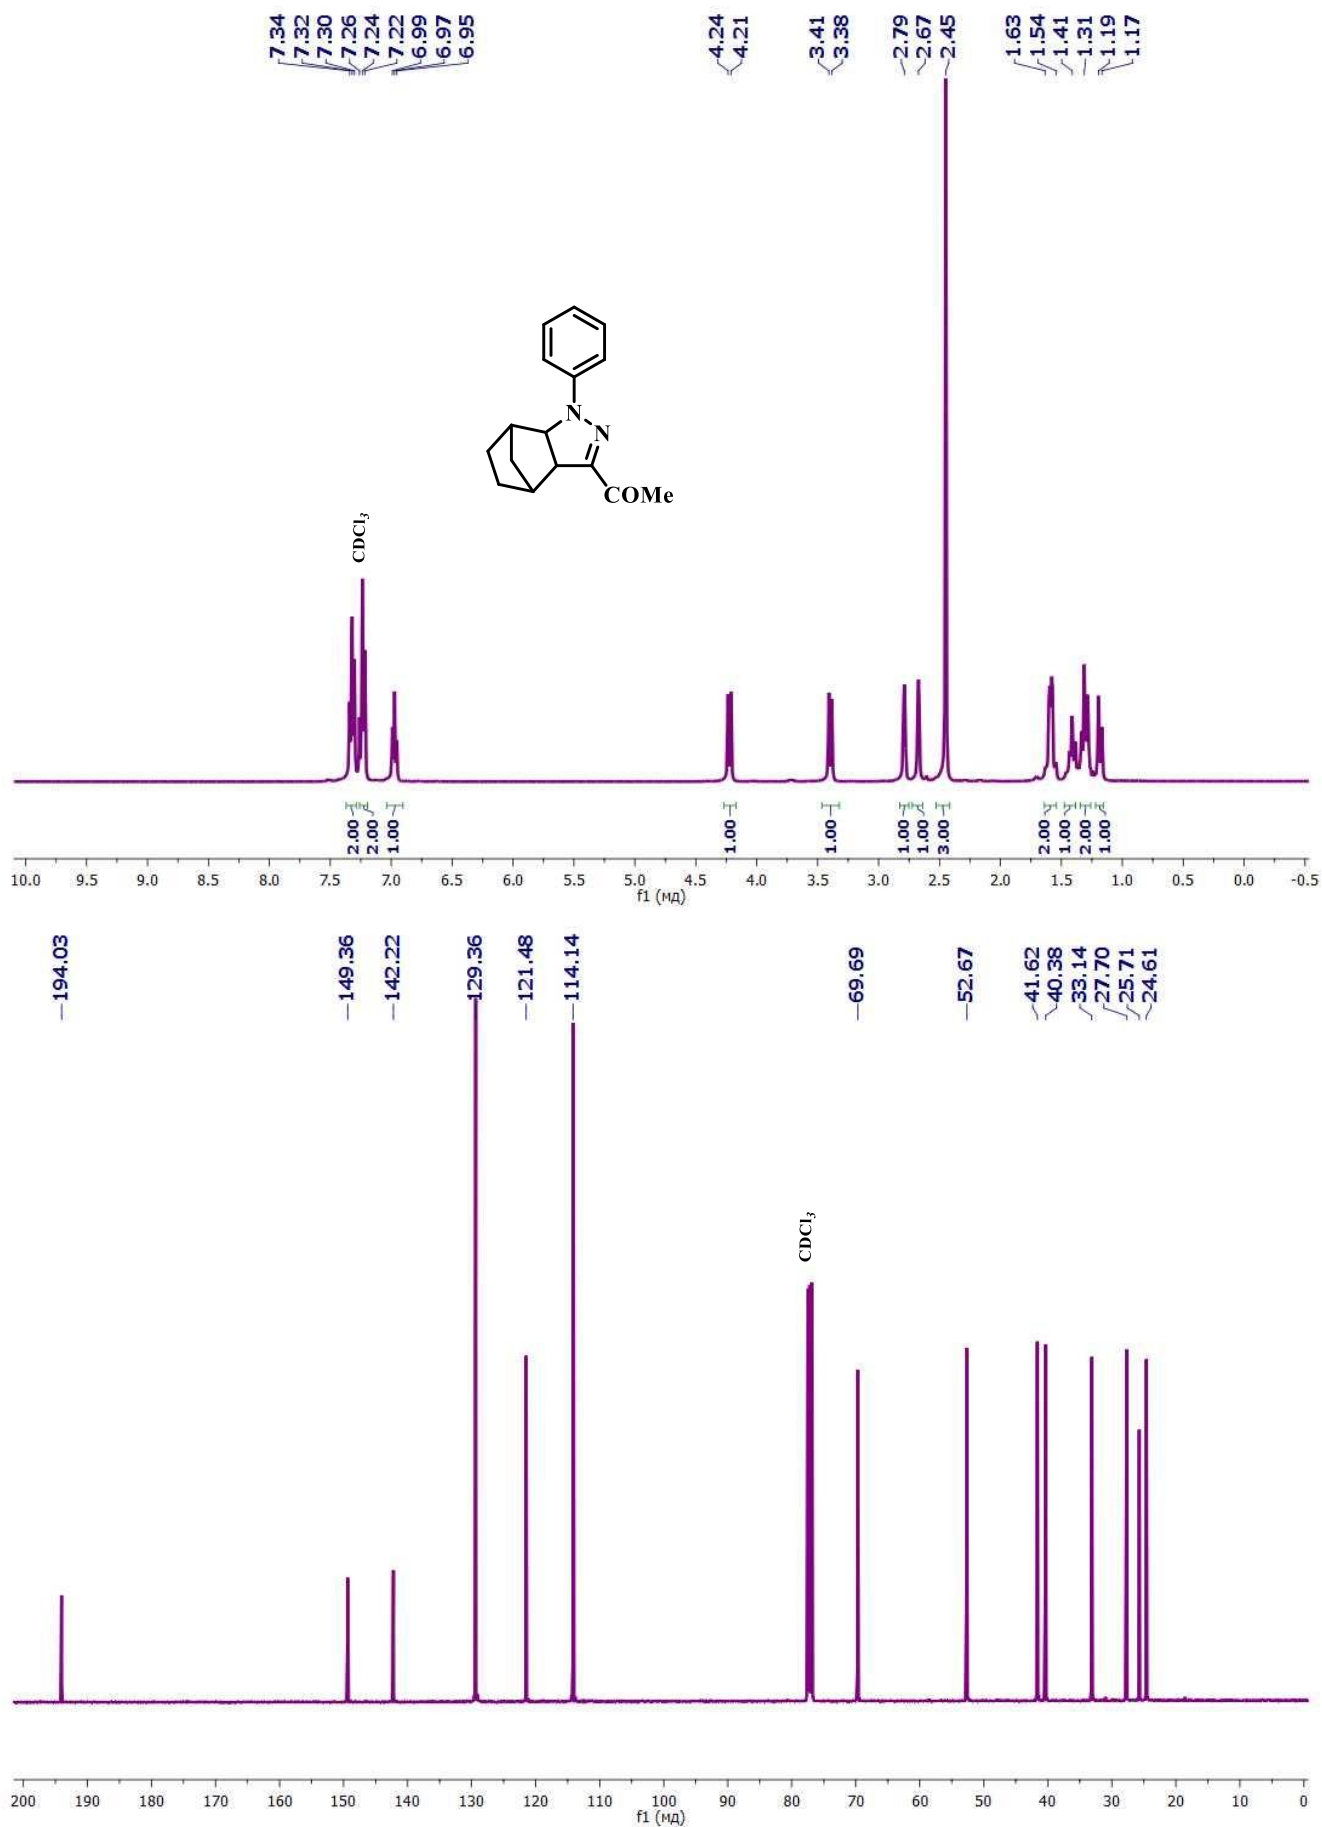

**Fig. S23.** <sup>1</sup>H NMR (400 MHz, CDCl<sub>3</sub>) and <sup>13</sup>C NMR (100 MHz, CDCl<sub>3</sub>) spectra of 1-(1-phenyl-3a,4,5,6,7,7a-hexahydro-1H-4,7-methanoindazol-3-yl)ethan-1-one (**4d**)



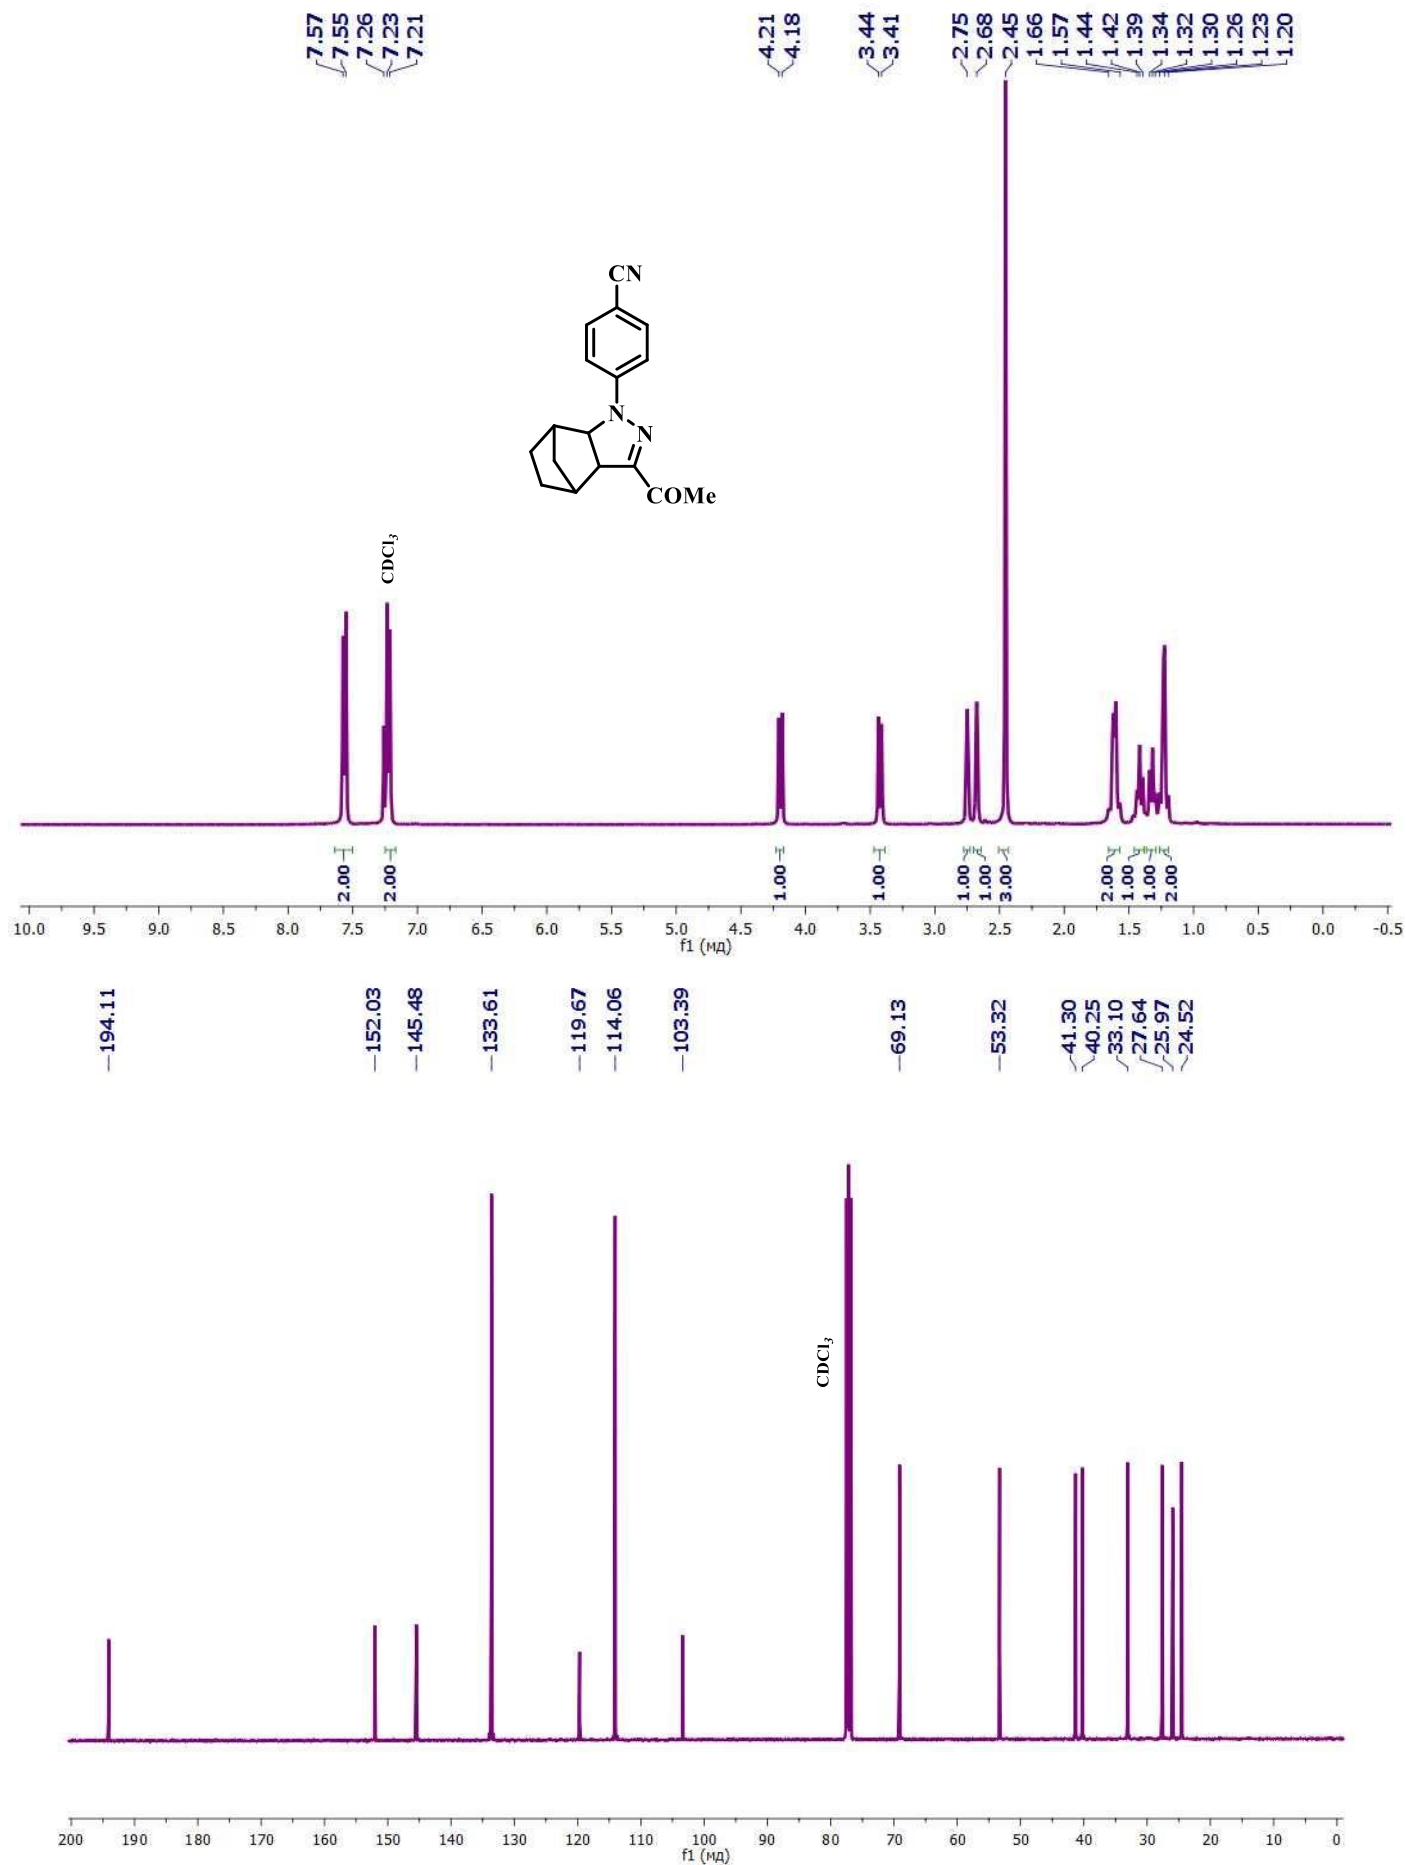

**Fig. S24.** <sup>1</sup>H NMR (400 MHz, CDCl<sub>3</sub>) and <sup>13</sup>C NMR (100 MHz, CDCl<sub>3</sub>) spectra of 4-(3-acetyl-3a,4,5,6,7,7a-hexahydro-1H-4,7-methanoindazol-1-yl)benzonitrile (**4e**)

### 3. XRD crystal data Me-DPP 2h and HMIs 4b,d

The XRD experiments were accomplished on an «Xcalibur 3» diffractometer on standard procedure (MoK $\alpha$ -irradiation, graphite monochromator,  $\omega$ -scans with 1° step at 295(2) K). Empirical absorption correction was applied. Using Olex2<sup>5</sup>, the structures were solved with the Superflip<sup>6</sup> structure solution program using Charge Flipping or SHELXS<sup>7</sup> by Direct Method (compounds **2h**, **4d**) and refined with the SHELXL<sup>7</sup> refinement package using Least Squares minimization in anisotropic approximation for non-hydrogen atoms. H-atoms were placed in the calculated positions and refined isotropically in the “rider” model.

Crystal structures were obtained by slow evaporation of the diluted solutions of compounds **2h** in a mixture of AcOEt/hexane **4d** in a mixture of CHCl<sub>3</sub>/EtOH.

The results of XRD experiments were registered in the Cambridge Structural Database with numbers CCDC 2044826 (for compound **2h**), and CCDC 2044827 (for compound **4d**). These data may be obtained free of charge via [www.ccdc.cam.ac.uk/data\\_request/cif](http://www.ccdc.cam.ac.uk/data_request/cif)

Crystal Data **2h**. C<sub>15</sub>H<sub>14</sub>ClN<sub>3</sub>O<sub>4</sub>, M = 335.74, monoclinic, a = 15.872(2) Å, b = 6.0495(4) Å, c = 16.2381(19) Å,  $\beta$  = 106.271(11)°, V = 1658.0(6) Å<sup>3</sup>, space group P2<sub>1</sub>/n, Z = 4,  $\mu$ (MoK $\alpha$ ) = 0.280 mm<sup>-1</sup>, 15847 reflections measured, 4123 unique ( $R_{\text{int}}$  = 0.0527) which were used in all calculations. The final  $R_1$  = 0.1098,  $wR_2$  = 0.0606 (all data) and  $R_1$  = 0.0380,  $wR_2$  = 0.0568 ( $I > 2\sigma(I)$ ).  $\Delta\rho_{\text{e}} = 0.372/-0.279 \text{ e}\text{\AA}^{-3}$ .

Crystal Data **4d**. C<sub>16</sub>H<sub>18</sub>N<sub>2</sub>O, M = 254.32, monoclinic, a = 11.5162(17) Å, b = 7.2314(9) Å, c = 16.393(3) Å,  $\beta$  = 95.819(14)°, V = 1358.2(4) Å<sup>3</sup>, space group P2<sub>1</sub>/n, Z = 4,  $\mu$ (MoK $\alpha$ ) = 0.079 mm<sup>-1</sup>, 8074 reflections measured, 3358 unique ( $R_{\text{int}}$  = 0.0315) which were used in all calculations. The final  $wR_2$  = 0.0834 (all data) and  $R_1$  = 0.0401 ( $I > 2\sigma(I)$ ).  $\Delta\rho_{\text{e}} = 0.189/-0.127 \text{ e}\text{\AA}^{-3}$ .

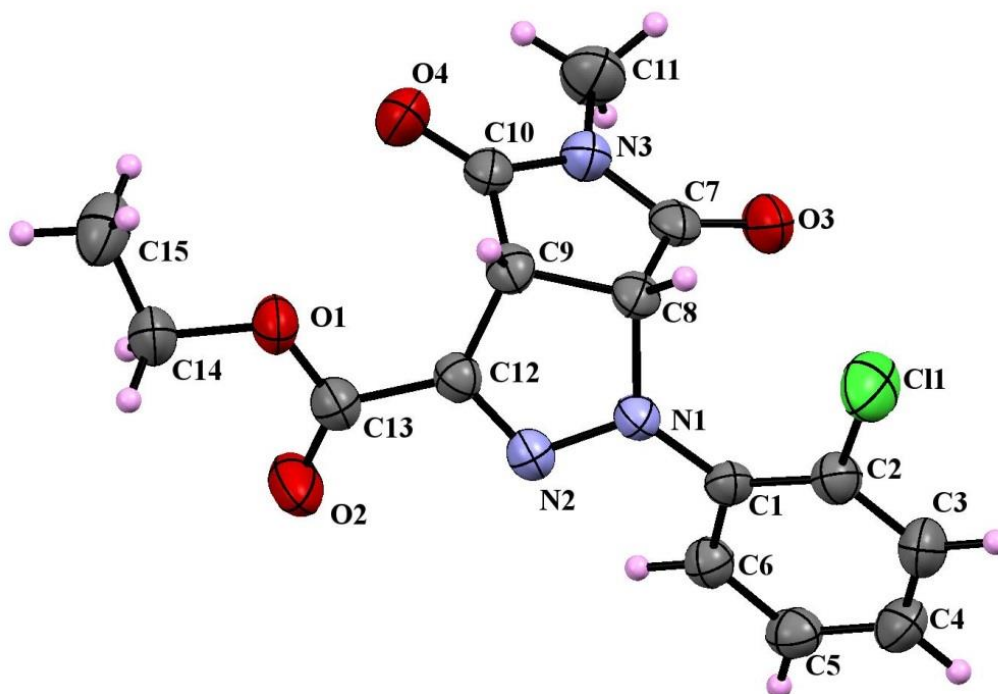

**Fig. S25.** The compound **2h** in the thermal ellipsoids of the 50% probability (disordering of the Et-group was omitted for clarity).

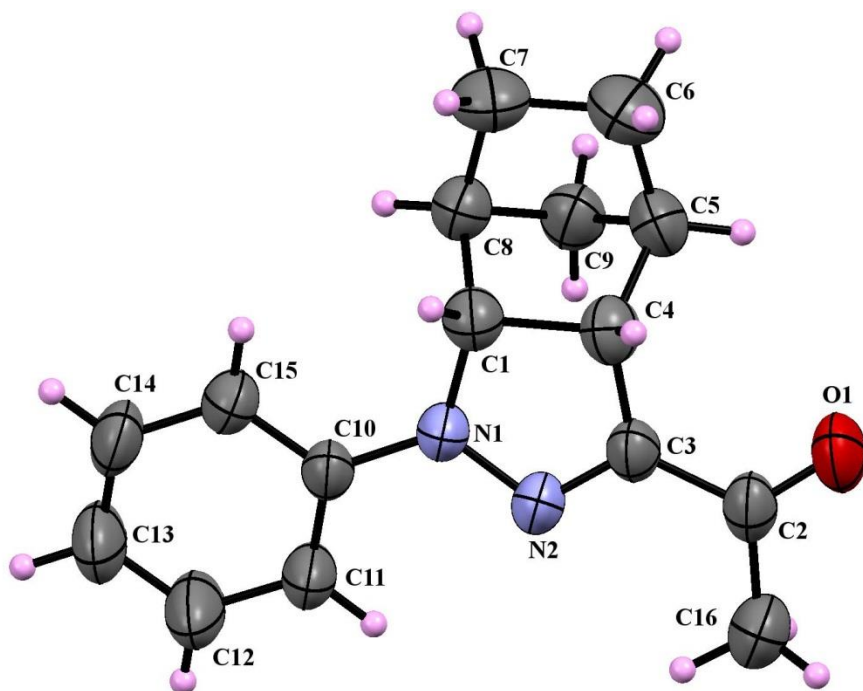

**Fig. S26.** The compound **4d** in the thermal ellipsoids of the 50% probability.

**Table S1.** Selected bonds lengths (in Å) for the compounds **2h**, **4b**, **4d** according to X-ray data

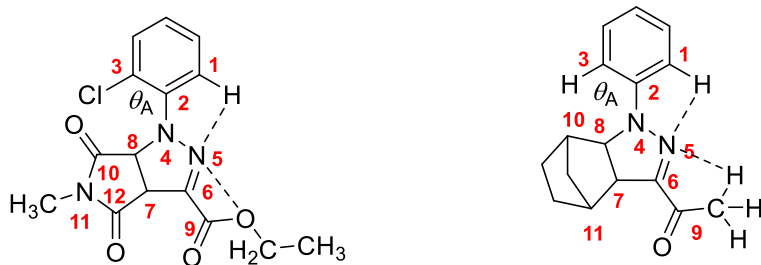

| Entry | Compd     | C2-N4 | N4-N5 | N5-C6 | C6-C7 | C7-C8 | C8-N4 | C6-C9 | $\theta_A$ | C10C8C7-C6 | C1H-N | N5-H <sub>CH3</sub> | N5-O  |
|-------|-----------|-------|-------|-------|-------|-------|-------|-------|------------|------------|-------|---------------------|-------|
| 1     | <b>2h</b> | 1.415 | 1.355 | 1.285 | 1.500 | 1.522 | 1.476 | 1.471 | 45.29      | 108.99     | 2.412 |                     | 2.812 |
| 2     | <b>4d</b> | 1.394 | 1.347 | 1.406 | 1.500 | 1.551 | 1.464 | 1.453 | 178.8      | 120.94     | 2.503 | 2.467               |       |

#### 4. Photophysical investigation

The absorption and emission spectra were recorded in chloroform using 10.00 mm quartz cells at room temperature. The excitation wavelength was at the absorption maxima. Atmospheric oxygen contained in the solutions was not removed. The concentrations of the compounds in solution were  $5.0 \times 10^{-5}$  M and  $1.0 \times 10^{-6}$  M for absorption and fluorescence measurements, respectively. The relative fluorescence quantum yields (QY) were determined using quinine sulphate ( $1 \times 10^{-6}$  M) in 0.1 M H<sub>2</sub>SO<sub>4</sub> as a standard ( $\Phi_F = 54.0\%$ ).<sup>5</sup>

Suitable single crystals of pyrazolines **6g** and **8** for XRD structural analysis were obtained by slow evaporation of a solution of the compounds in ethyl acetate at room temperature. XRD data were obtained on a CCD area detector diffractometer using the standard procedure (MoK-irradiation, graphite monochromator,  $\omega$ -scanning with 1° step, T = 295(2) K). Empirical absorption correction was applied. Using Olex2,<sup>6</sup> the structure was solved with the Superflip<sup>7</sup> structure solution program using Charge Flipping and refined with the ShelXL<sup>8</sup> refinement package using Least Squares minimization in anisotropic approximation for nonhydrogen atoms. The H-atoms were added at the calculated position and refined in the “rider” model. These data can be obtained free of charge from the Cambridge Crystallographic Data Centre via link [www.ccdc.cam.ac.uk/data\\_request/cif](http://www.ccdc.cam.ac.uk/data_request/cif).

**Table S2.** Photophysical properties of Me-DTPs **2a-l**, Ph-DTPs **3a-e** and HMIs **4a-d**

| Entry | Compd     | UV-Vis <sup>a</sup>              |                                                                | Fluorescence <sup>b</sup>       |                  | Stokes shift, (nm/cm <sup>-1</sup> ) |
|-------|-----------|----------------------------------|----------------------------------------------------------------|---------------------------------|------------------|--------------------------------------|
|       |           | $\lambda_{\text{absmax}}$ , (nm) | $\epsilon_{\text{max}}$ , (M <sup>-1</sup> ·cm <sup>-1</sup> ) | $\lambda_{\text{emmax}}$ , (nm) | $\Phi_F^c$ , (%) |                                      |
| 1     | <b>2a</b> | 364                              | 20700                                                          | 512                             | 1.7              | 148/7949                             |
| 2     | <b>2b</b> | 361                              | 16900                                                          | 494                             | 4.0              | 133/7458                             |
| 3     | <b>2c</b> | 356                              | 12600                                                          | 491                             | 7.6              | 135/7723                             |
| 4     | <b>2d</b> | 349                              | 13726                                                          | 469                             | 10.8             | 120/7331                             |
| 5     | <b>2e</b> | 350                              | 15200                                                          | 474                             | 10.8             | 124/7474                             |
| 6     | <b>2f</b> | 341                              | 18100                                                          | 449                             | 42.3             | 108/7054                             |
| 7     | <b>2g</b> | 346                              | 18700                                                          | 448                             | 77.7             | 102/6580                             |
| 8     | <b>2h</b> | 320                              | 18900                                                          | 471                             | 5.1              | 151/10010                            |
| 9     | <b>2i</b> | 371                              | 13000                                                          | 500                             | 18.6             | 129/6954                             |
| 10    | <b>2j</b> | 361                              | 13200                                                          | 486                             | 16.0             | 125/7125                             |
| 11    | <b>2k</b> | 356                              | 18000                                                          | 459                             | 13.9             | 102/6256                             |
| 12    | <b>3a</b> | 356                              | 10300                                                          | 492                             | 9.2              | 136/7765                             |
| 13    | <b>3b</b> | 344                              | 15600                                                          | 448                             | 71.9             | 104/6748                             |
| 14    | <b>3c</b> | 370                              | 12300                                                          | 501                             | 16.4             | 131/7067                             |
| 15    | <b>3d</b> | 362                              | 13400                                                          | 485                             | 12.8             | 123/7006                             |
| 16    | <b>3e</b> | 356                              | 15200                                                          | 458                             | 14.0             | 102/6256                             |
| 17    | <b>4a</b> | 370                              | 16300                                                          | 487                             | 26.3             | 117/6493                             |
| 18    | <b>4b</b> | 363                              | 16800                                                          | 443                             | 93.1             | 80/4975                              |
| 19    | <b>4c</b> | 385                              | 16900                                                          | 499                             | 13.6             | 114/5934                             |
| 20    | <b>4d</b> | 378                              | 17400                                                          | 488                             | 38.9             | 110/5963                             |
| 21    | <b>4e</b> | 375                              | 24600                                                          | 457                             | 32.7             | 82/4785                              |

<sup>a</sup>UV-vis absorption wavelengths at room temperature at a concentration of  $5 \times 10^{-5}$  M.

<sup>b</sup>Fluorescence wavelengths at room temperature at a concentration of  $1 \times 10^{-6}$  M.

<sup>c</sup>The relative quantum yield, were definite with the standard - quinine sulfate (solution c = 0.1M H<sub>2</sub>SO<sub>4</sub>,  $\Phi_F = 54.0\%$ ).

**Table S3.** Photophysical properties of Ph-DPPs **3a**, **b**, **e** and HMI **4d** in dependent of concentration

| Entry | Compd     | c, M                 | UV-Vis <sup>b</sup>               |                                                               | Fluorescence <sup>c</sup>        |                       | SS,<br>nm/cm <sup>-1</sup> |
|-------|-----------|----------------------|-----------------------------------|---------------------------------------------------------------|----------------------------------|-----------------------|----------------------------|
|       |           |                      | $\lambda_{\text{absmax}}$ ,<br>nm | $\epsilon_{\text{max}}$ ,<br>M <sup>-1</sup> cm <sup>-1</sup> | $\lambda_{\text{emmax}}$ ,<br>nm | QY, <sup>d</sup><br>% |                            |
| 1     | <b>3a</b> | 1.0×10 <sup>-6</sup> | 353                               | 13000                                                         | 481                              | 9.2                   | 128/7539                   |
| 2     |           | 2.5×10 <sup>-6</sup> | 353                               | 8400                                                          | 490                              | 6.4                   | 137/7920                   |
| 3     |           | 5.0×10 <sup>-6</sup> | 353                               | 9000                                                          | 492                              | 5.9                   | 139/8003                   |
| 4     | <b>3b</b> | 1.0×10 <sup>-6</sup> | 349                               | 17000                                                         | 447                              | 71.9                  | 107/7040                   |
| 5     |           | 2.5×10 <sup>-6</sup> | 344                               | 19600                                                         | 448                              | 68.3                  | 104/6748                   |
| 6     |           | 5.0×10 <sup>-6</sup> | 344                               | 19000                                                         | 448                              | 60.7                  | 104/6748                   |
| 7     | <b>3e</b> | 1.0×10 <sup>-6</sup> | 371                               | 12000                                                         | 460                              | 17.7                  | 89/5215                    |
| 8     |           | 2.5×10 <sup>-6</sup> | 371                               | 13600                                                         | 473                              | 8.4                   | 102/5813                   |
| 9     |           | 5.0×10 <sup>-6</sup> | 371                               | 13600                                                         | 496                              | 4.1                   | 125/6793                   |
| 10    | <b>4d</b> | 1.0×10 <sup>-6</sup> | 373                               | 32000                                                         | 458                              | 32.7                  | 85/4976                    |
| 11    |           | 2.5×10 <sup>-6</sup> | 376                               | 19600                                                         | 457                              | 31.7                  | 81/4714                    |
| 12    |           | 5.0×10 <sup>-6</sup> | 376                               | 17000                                                         | 458                              | 31.0                  | 82/4762                    |

<sup>a</sup>The experiment was repeated several times. <sup>b</sup>UV-vis absorption wavelengths at room temperature at a concentration of 5×10<sup>-5</sup> M. <sup>c</sup> Fluorescence wavelengths at room temperature at a concentration of 1×10<sup>-6</sup> M. <sup>d</sup>The relative quantum yield, were definite with the standard - quinine sulfate (solution c = 0.1M H<sub>2</sub>SO<sub>4</sub>, Φ<sub>F</sub> = 54.0 %).

**Table S4.** Lifetime values of Me-DPPs **2i-k**, Ph-DPPs **3a-e**, and HMIs **4b-c** obtained in CHCl<sub>3</sub>

| Entry | Compd     | $\tau_1^a$ (ns) | A <sub>1</sub> <sup>b</sup> | $\tau_2^a$ (ns) | A <sub>2</sub> <sup>b</sup> | $\tau_3^a$ (ns) | A <sub>3</sub> <sup>b</sup> | $\langle\tau\rangle_f^c$ (ns) | $\chi^2$ |
|-------|-----------|-----------------|-----------------------------|-----------------|-----------------------------|-----------------|-----------------------------|-------------------------------|----------|
| 1     | <b>2i</b> | 0.0830085       | -0.1266                     | 0.6796846       | 1.0744                      | 3.640079        | 0.0522                      | 0.9098                        | 1.140    |
| 2     | <b>2j</b> | 1.20049         | 0.7467                      | 1.916438        | 0.2533                      | -               | -                           | 1.3818                        | 1.112    |
| 3     | <b>2k</b> | 1.580955        | 0.0619                      | 0.2382781       | 0.9113                      | 4.411467        | 0.0269                      | 0.4337                        | 1.106    |
| 4     | <b>3a</b> | 0.1440308       | -0.2094                     | 0.9638026       | 1.1377                      | 2.808342        | 0.0716                      | 1.2674                        | 1.012    |
| 5     | <b>3b</b> | 2.1449          | 0.2329                      | 0.234713        | -0.0739                     | 5.047551        | 0.8410                      | 4.7272                        | 1.048    |
| 6     | <b>3c</b> | 0.6716223       | 0.931                       | 3.508906        | 0.069                       | -               | -                           | 0.8674                        | 1.098    |
| 7     | <b>3d</b> | 1.199454        | 0.8333                      | 2.183725        | 0.1667                      | -               | -                           | 1.3635                        | 1.028    |
| 8     | <b>3e</b> | 1.305331        | 0.0496                      | 0.2403628       | 0.8996                      | 3.512939        | 0.0508                      | 0.4594                        | 1.186    |
| 9     | <b>4b</b> | 1.506172        | 0.2404                      | 0.3154246       | -0.1705                     | 4.330757        | 0.5878                      | 3.3694                        |          |
| 10    | <b>4b</b> | 1.547604        | 0.2404                      | 0.2504187       | -0.0649                     | 3.807704        | 0.8245                      | 3.4952                        | 1.093    |
| 11    | <b>4d</b> | 1.080918        | 0.5294                      | 2.2946150       | 0.4706                      | -               | -                           | 1.65208                       | 1.141    |

<sup>a</sup>Fluorescence lifetime. <sup>b</sup>Fractional contribution. <sup>c</sup>Weighted mean lifetime. <sup>d</sup> $\chi^2$ -Chi-squared.

**Table S5.** Absorption ( $c = 5 \times 10^{-5}$  M) and emission ( $c = 1 \times 10^{-6}$  M) properties of pyrazolines **2g**, **3b**, **4b** and **4d** in different solvents

| Entry | Structure                                                                           | Compd     | Solvent                                | $E_T(30)^a$ | UV-Vis                          |                                                            | Fluorescence                   |                    | Stokes Shift, nm/cm <sup>-1</sup> |
|-------|-------------------------------------------------------------------------------------|-----------|----------------------------------------|-------------|---------------------------------|------------------------------------------------------------|--------------------------------|--------------------|-----------------------------------|
|       |                                                                                     |           |                                        |             | $\lambda_{\text{abs,max}}$ , nm | $\epsilon_{\text{max}}$ , M <sup>-1</sup> cm <sup>-1</sup> | $\lambda_{\text{em,max}}$ , nm | QY, <sup>b</sup> % |                                   |
| 1     | 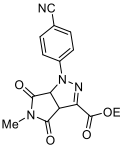   | <b>2g</b> | Toluene                                | 33.9        | 346                             | 19500                                                      | 441                            | 50.5               | 95/6226                           |
| 2     |                                                                                     |           | 1,4-Dioxane                            | 36.0        | 344                             | 24200                                                      | 442                            | 80.8               | 98/6445                           |
| 3     |                                                                                     |           | CHCl <sub>3</sub>                      | 39.1        | 345                             | 17100                                                      | 448                            | 59.7               | 103/6664                          |
| 4     |                                                                                     |           | EtOAc                                  | 38.1        | 342                             | 23300                                                      | 442                            | 92.4               | 100/6615                          |
| 5     |                                                                                     |           | DMF                                    | 43.2        | 348                             | 24674                                                      | 450                            | 53.3               | 102/6513                          |
| 6     |                                                                                     |           | DMSO                                   | 45.1        | 350                             | 23100                                                      | 455                            | 41.0               | 105/6593                          |
| 7     |                                                                                     |           | MeCN                                   |             | 345                             | 22500                                                      | 450                            | 69.6               | 105/6763                          |
| 8     |                                                                                     |           | EtOH                                   | 51.9        | 346                             | 32050                                                      | 460                            | 18.6               | 114/7163                          |
| 9     |                                                                                     |           | 1-BuOH                                 | 50.2        | 345                             | 23900                                                      | 457                            | 47.7               | 112/7104                          |
| 10    |                                                                                     |           | Ethylene glycole                       |             | 350                             | 13800                                                      | 466                            | 30.1               | 116/7112                          |
| 11    |    | <b>3b</b> | Toluene                                | 33.9        | 345                             | 16300                                                      | 442                            | 67.7               | 97/6361                           |
| 12    |                                                                                     |           | 1,4-Dioxane                            | 36.0        | 344                             | 15600                                                      | 443                            | 61.7               | 99/6496                           |
| 13    |                                                                                     |           | CHCl <sub>3</sub>                      | 39.1        | 344                             | 15900                                                      | 448                            | 71.9               | 104/6748                          |
| 14    |                                                                                     |           | EtOAc                                  | 38.1        | 341                             | 20400                                                      | 443                            | 65.9               | 102/6752                          |
| 15    |                                                                                     |           | DMF                                    | 43.2        | 349                             | 22000                                                      | 451                            | 47.6               | 102/6480                          |
| 16    |                                                                                     |           | DMSO                                   | 45.1        | 352                             | 24995                                                      | 457                            | 49.8               | 105/6527                          |
| 17    |                                                                                     |           | MeCN                                   |             | 344                             | 24800                                                      | 460                            | 16.6               | 113/7079                          |
| 18    |                                                                                     |           | EtOH                                   | 51.9        | 347                             | 18379                                                      | 460                            | 16.6               | 120/7673                          |
| 19    |                                                                                     |           | BuOH                                   | 50.2        | 350                             | 24500                                                      | 457                            | 25.6               | 107/7020                          |
| 20    |                                                                                     |           | CH <sub>2</sub> (OH)CH <sub>2</sub> OH |             | 351                             | 19100                                                      | 465                            | 5.7                | 114/6985                          |
| 21    |  | <b>4b</b> | Toluene                                | 33.9        | 361                             | 23200                                                      | 432                            | 60.6               | 71/4553                           |
| 22    |                                                                                     |           | 1,4-Dioxane                            | 36.0        | 360                             | 20600                                                      | 437                            | 57.2               | 77/4894                           |
| 23    |                                                                                     |           | CHCl <sub>3</sub>                      | 39.1        | 363                             | 17300                                                      | 443                            | 93.1               | 80/4975                           |
| 24    |                                                                                     |           | EtOAc                                  | 38.1        | 358                             | 12000                                                      | 436                            | 57.6               | 78/4997                           |
| 25    |                                                                                     |           | MeCN                                   | 43.2        | 359                             | 11300                                                      | 446                            | 54.6               | 87/5434                           |
| 26    |                                                                                     |           | DMF                                    | 45.1        | 363                             | 31300                                                      | 446                            | 82.0               | 83/5127                           |
| 27    |                                                                                     |           | DMSO                                   |             | 364                             | 32300                                                      | 449                            | 82.3               | 85/5201                           |
| 28    |                                                                                     |           | EtOH                                   | 51.9        | 361                             | 12100                                                      | 457                            | 58.6               | 96/5819                           |
| 29    |                                                                                     |           | BuOH                                   | 50.2        | 361                             | 12100                                                      | 453                            | 70.0               | 92/5626                           |
| 30    |                                                                                     |           | CH <sub>2</sub> (OH)CH <sub>2</sub> OH |             | 364                             | 20500                                                      | 464                            | 54.0               | 100/5921                          |
| 31    |  | <b>4d</b> | Toluene                                | 33.9        | 374                             | 25900                                                      | 444                            | 3.2                | 70/4215                           |
| 32    |                                                                                     |           | 1,4-Dioxane                            | 36.0        | 371                             | 30100                                                      | 447                            | 5.6                | 76/4583                           |
| 33    |                                                                                     |           | CHCl <sub>3</sub>                      | 39.1        | 375                             | 24600                                                      | 456                            | 33.2               | 81/4737                           |
| 34    |                                                                                     |           | EtOAc                                  | 38.1        | 369                             | 28000                                                      | 449                            | 5.5                | 80/4829                           |
| 35    |                                                                                     |           | DMF                                    | 43.2        | 374                             | 31200                                                      | 460                            | 23.4               | 86/4999                           |
| 36    |                                                                                     |           | DMSO                                   | 45.1        | 378                             | 29600                                                      | 463                            | 35.2               | 85//4857                          |
| 37    |                                                                                     |           | MeCN                                   |             | 372                             | 30000                                                      | 461                            | 25.6               | 89/5190                           |
| 38    |                                                                                     |           | EtOH                                   | 51.9        | 376                             | 32400                                                      | 484                            | 35.9               | 108/5935                          |
| 39    |                                                                                     |           | BuOH                                   | 50.2        | 376                             | 34800                                                      | 476                            | 35.1               | 100/5587                          |
| 40    |                                                                                     |           | Ethylene glycole                       |             | 379                             | 19100                                                      | 490                            | 18.9               | 111/5977                          |

<sup>a</sup> Reichardt empirical polarity parameter.

<sup>b</sup>Значение относительного квантового выхода, стандарт – хинин сульфат (раствор  $c = 0.1$  M H<sub>2</sub>SO<sub>4</sub>,  $\Phi_F = 54.0$  %).

**Table S6.** The UV-Vis and fluorescence data of DTP **1c** in DMSO-water mixture with different water volume fractions.

| №  | Water content, % | UV-Vis                         |                                                             | Fluorescence                  |                       |                                   |
|----|------------------|--------------------------------|-------------------------------------------------------------|-------------------------------|-----------------------|-----------------------------------|
|    |                  | $\lambda_{\text{absmax}}$ , nm | $\epsilon_{\text{max}}$ ,<br>$\text{M}^{-1} \text{cm}^{-1}$ | $\lambda_{\text{emmax}}$ , nm | $\Phi_{\text{F}}$ , % | SS,<br>$\text{nm}/\text{cm}^{-1}$ |
| 1  | 0                | 351                            | 28400                                                       | 455                           | 51.5                  | 104/6512                          |
| 2  | 10               | 350                            | 31800                                                       | 458                           | 40.6                  | 108/6737                          |
| 3  | 20               | 350                            | 39400                                                       | 461                           | 32.3                  | 111/6879                          |
| 4  | 30               | 351                            | 30200                                                       | 463                           | 27.7                  | 112/6892                          |
| 5  | 40               | 350                            | 29800                                                       | 465                           | 20.4                  | 115/7066                          |
| 6  | 50               | 351                            | 29400                                                       | 470                           | 15.0                  | 119/7213                          |
| 7  | 60               | 352                            | 29200                                                       | 472                           | 11.4                  | 120/7223                          |
| 8  | 70               | 351                            | 29800                                                       | 474                           | 8.6                   | 123/7393                          |
| 9  | 80               | 352                            | 27800                                                       | 474                           | 7.6                   | 122/7312                          |
| 10 | 90               | 352                            | 26600                                                       | 478                           | 5.9                   | 126/7489                          |

<sup>a</sup>UV-vis absorption wavelengths at room temperature at a concentration of  $5 \times 10^{-5}$  M.

<sup>b</sup>Fluorescence quantum yields measured using a 0.1 M  $\text{H}_2\text{SO}_4$  solution of quinine sulphate ( $\Phi_{\text{F}} = 54.0$ )

## 5. Quantum mechanical calculations

The ground state molecular geometry of the compounds under investigation was fully optimized at density functional theory (DFT) level, both in vacuo and in solvents (DMSO, EtOH, DMF, CHCl<sub>3</sub>, Toluene, MeCN). We compared the results obtained by employing different functionals with the experimental data. We chose hybrid (viz. B3LYP<sup>8</sup>, and M06-2X<sup>9</sup>), long-range corrected (viz. CAM-B3LYP<sup>10</sup> and  $\omega$ B97X<sup>11</sup>), coupled with the 6-311++G\*\* and aug-cc-pVTZ basis sets. The D3 version of Grimme's semi-empirical dispersion with Becke-Johnson damping GD3BJ<sup>12</sup> was also included in the case of the B3LYP, CAM-B3LYP, and  $\omega$ B97X functionals. Solvent effects were taken into account via the implicit polarizable continuum model in its integral equation formalism (IEF-PCM).<sup>13</sup> For geometry optimizations and frequency calculations, the PCM molecular cavity was built according to the universal force field (UFF)<sup>14</sup> radii within the value used in the last implementation of the PCM (based on a continuum surface charge formalism). For topological analysis and the evaluation of energetics, SMD parameterization was employed.<sup>15</sup> The standard values for dielectric constants and refractive indexes were always assumed. The vibrational frequencies and thermochemicals were computed in harmonic approximation at T = 298.15 K and p = 1 atm, and no imaginary frequencies were found.

The atomic charge population analysis, electric multiple moments, electronic density, and electrostatic potential were also computed using Mulliken's and the CHelpG procedure<sup>16</sup> for both the ground and the S<sub>1</sub> excited (vertical and relaxed) states.

To investigate the presence and nature of possible intramolecular H-bonding interactions the non-covalent interaction (NCI) index combined with the second derivative of the reduced density gradient along the second main axis of variation were employed.<sup>17</sup> this procedure was applied both to the ground and first singlet excited states.

The integration grid for the electronic density for topological and RDG analysis was set to 150 radial shells and 974 angular points. For the rest of the calculations, the integration grid was set as 99 radial shells and 590 angular points. The convergence criteria of the self-consistent field were set to 10<sup>-12</sup> for the RMS change in the density matrix and 10<sup>-10</sup> for the maximum change in the density matrix. The Convergence criteria for optimizations were set to 2 x 10<sup>-6</sup> a.u. for maximum force, 1 x 10<sup>-6</sup> a.u. for RMS force, 6 x 10<sup>-6</sup> a.u. for maximum displacement and 4 x 10<sup>-6</sup> a.u. for RMS displacement.

All calculations were performed using the GAUSSIAN G09.D01 software package.<sup>19</sup> The location of BCPs and subsequent calculation of SF values were performed using a modified version of the PROAIMV program.<sup>20</sup>



**Table S7.** Stability of the different isomers of Me-DPPs **2a,e-g,k**, Ph-DPP **3b** and HMI **4b** in CHCl<sub>3</sub> in kJ/mol

| Entry | Compd                                                                                            | Rotamer | $\Delta E$ | $\Delta(E+ZPE)$ | $\Delta H$ | $\Delta G$ | $f$   |
|-------|--------------------------------------------------------------------------------------------------|---------|------------|-----------------|------------|------------|-------|
| 1     | 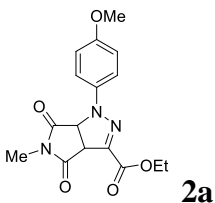<br><b>2a</b>   | A       | 2.5        | 3.5             | 3.0        | 5.1        | 0.064 |
| 2     |                                                                                                  | B       |            | 2.3             | 3.3        | 2.7        | 5.1   |
| 3     |                                                                                                  | C       |            | 0.1             | 0.7        | 0.5        | 0.7   |
| 4     |                                                                                                  | D       |            | 0.0             | 0.0        | 0.0        | 0.0   |
| 5     |                                                                                                  | E       |            | 32.7            | 32.2       | 32.0       | 33.5  |
| 6     |                                                                                                  | F       |            | 32.2            | 32.4       | 32.2       | 33.2  |
| 7     |                                                                                                  | G       |            | 32.8            | 32.8       | 32.6       | 33.3  |
| 8     |                                                                                                  | H       |            | 32.0            | 31.5       | 31.4       | 32.1  |
| 9     | <br><b>2e</b>   | A       | 2.4        | 2.8             | 2.4        | 5.3        | 0.105 |
| 10    |                                                                                                  | B       |            | 0.0             | 0.0        | 0.0        | 0.0   |
| 11    |                                                                                                  | C       |            | 32.8            | 32.6       | 32.5       | 33.5  |
| 12    |                                                                                                  | D       |            | 32.9            | 32.3       | 32.3       | 33.1  |
| 13    | <br><b>2f</b>   | A       |            | 2.4             | 2.6        | 2.3        | 4.6   |
| 14    |                                                                                                  | B       |            | 0.0             | 0.0        | 0.0        | 0.0   |
| 15    |                                                                                                  | C       |            | 33.2            | 33.0       | 32.9       | 32.9  |
| 16    |                                                                                                  | D       |            | 33.2            | 32.9       | 32.8       | 34.4  |
| 17    | <br><b>2g</b>  | A       |            | 2.3             | 2.8        | 2.3        | 5.8   |
| 18    |                                                                                                  | B       |            | 0.0             | 0.0        | 0.0        | 0.0   |
| 19    |                                                                                                  | C       |            | 33.3            | 33.4       | 33.1       | 34.9  |
| 20    |                                                                                                  | D       |            | 33.4            | 33.2       | 33.0       | 34.7  |
| 21    | <br><b>2k</b> | A       |            | 0.0             | 0.0        | 0.0        | 0.0   |
| 22    |                                                                                                  | B       |            | 1.5             | 1.7        | 1.5        | 2.6   |
| 23    | <br><b>3b</b> | A       |            | 1.7             | 2.3        | 1.9        | 5.2   |
| 24    |                                                                                                  | B       |            | 0.0             | 0.0        | 0.0        | 0.0   |
| 25    | <br><b>4b</b> | A       |            | 0.0             | 0.0        | 0.0        | 0.0   |
| 26    |                                                                                                  | B       |            | 2.13            | 2.42       | 2.33       | 2.29  |

Rotamers spectroscopical and other properties will be computed for those rotamers having  $f > 0.1$  (10%)

| Entry | Compd | $S_0$ |  | $S_1$ |  |
|-------|-------|-------|--|-------|--|
| 1     | 2a    |       |  |       |  |
| 2     | 2e    |       |  |       |  |
| 3     | 2f    |       |  |       |  |
| 4     | 2g    |       |  |       |  |
| 5     | 2k    |       |  |       |  |
| 6     | 3b    |       |  |       |  |
| 7     | 4b    |       |  |       |  |

**Fig. S27.** Optimized geometries of the investigated molecules **2a**, **e-g,k**, **3b** and **4b** in their ground (*GS*) and exciting (*ES*) state, in  $\text{CHCl}_3$  and depicted from two orthogonal viewpoints. Level of theory: DFT /IEF-PCM(UFF). Legend of colours: white (H), grey (C), lilac (N), and red (O).

**Table S8.** Selected bonds lengths (in Å) and angles (in grad) for the GS ( $S_0$ ) optimized geometries of compounds **2a**, **e-g,k**, **3b** and **4b** in  $\text{CHCl}_3$ . The selected bond lengths (Å) and bond angles ( $^\circ$ ) B3LYP/6-311G+(d,p) calculation.

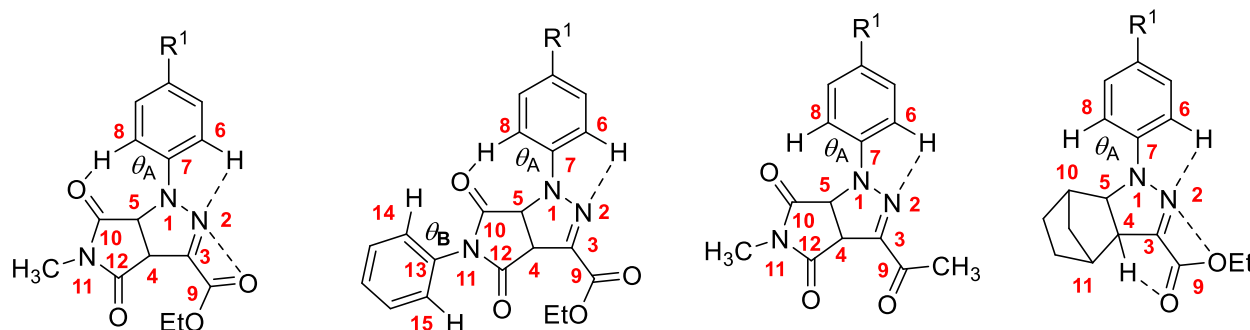

| Entry | Compd     | C7-N1 | N1-N2 | N2-C3 | C3-C4 | C4-C5 | C5-N1 | C3-C9 | C9=O  | C9-OEt | C10-O | C12-O | N11-C13 | $\theta_A$ | $\theta_B$ | C10C8C7-C6 |
|-------|-----------|-------|-------|-------|-------|-------|-------|-------|-------|--------|-------|-------|---------|------------|------------|------------|
| 1     | <b>2a</b> | 1.428 | 1.339 | 1.334 | 1.407 | 1.372 | 1.351 | 1.485 | 1.210 | 1.329  | 1.210 | 1.207 | 1.451   | 27.8       | -          | 177.0      |
| 2     | <b>2e</b> | 1.427 | 1.341 | 1.332 | 1.408 | 1.371 | 1.352 | 1.486 | 1.209 | 1.328  | 1.209 | 1.206 | 1.452   | 26.5       | -          | 177.1      |
| 3     | <b>2f</b> | 1.426 | 1.341 | 1.331 | 1.409 | 1.370 | 1.353 | 1.487 | 1.209 | 1.328  | 1.209 | 1.206 | 1.452   | 26.6       | -          | 177.2      |
| 4     | <b>2g</b> | 1.425 | 1.342 | 1.332 | 1.409 | 1.369 | 1.353 | 1.487 | 1.209 | 1.328  | 1.209 | 1.206 | 1.452   | 25.6       | -          | 177.2      |
| 5     | <b>2k</b> | 1.427 | 1.341 | 1.331 | 1.411 | 1.371 | 1.356 | 1.498 | 1.214 | -      | 1.210 | 1.208 | 1.453   | -2.81      | -          | 179.9      |
| 6     | <b>3b</b> | 1.427 | 1.342 | 1.327 | 1.408 | 1.370 | 1.359 | 1.488 | 1.209 | 1.326  | 1.207 | 1.203 | 1.428   | 1.1        | 57.5       | 179.2      |
| 7     | <b>4b</b> | 1.382 | 1.350 | 1.287 | 1.505 | 1.580 | 1.477 | 1.478 | 1.216 | 1.332  |       |       |         | -1.30      |            | 109.1      |

**Table S9.** Selected bonds lengths (in Å) and angles (in grad) for the ES ( $S_{1r}$ ) optimized geometries of compounds **2a**, **e-g,k**, **3b** and **4b** in  $\text{CHCl}_3$

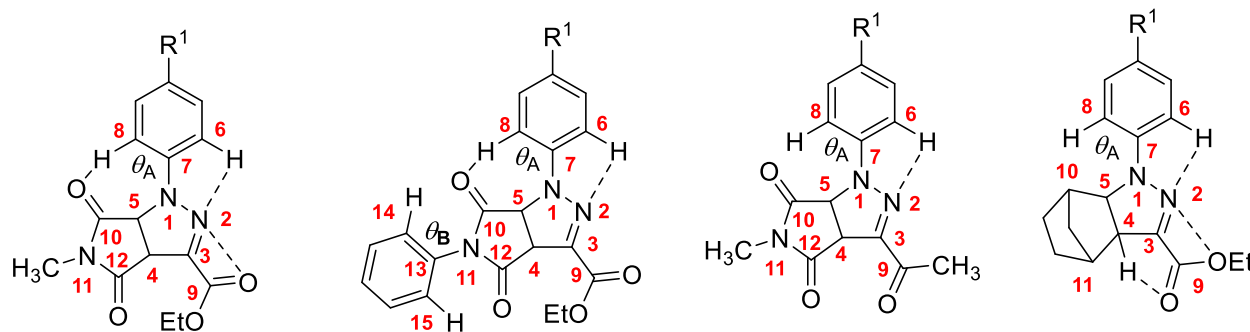

| Entry | Compd     | C7-N1 | N1-N2 | N2-C3 | C3-C4 | C4-C5 | C5-N1 | C3-C9 | C9=O  | C9-OEt | C10-O | C12-O | N11-C13 | $\theta_A$ | $\theta_B$ | C10C5C4-C3 |
|-------|-----------|-------|-------|-------|-------|-------|-------|-------|-------|--------|-------|-------|---------|------------|------------|------------|
| 1     | <b>2a</b> | 1.355 | 1.391 | 1.313 | 1.425 | 1.387 | 1.392 | 1.493 | 1.205 | 1.322  | 1.235 | 1.222 | 1.445   | 0.14       | -          | 179.9      |
| 2     | <b>2d</b> | 1.416 | 1.367 | 1.309 | 1.425 | 1.440 | 1.357 | 1.488 | 1.205 | 1.323  | 1.225 | 1.222 | 1.420   | 1.50       | -          | 179.8      |
| 3     | <b>2e</b> | 1.415 | 1.365 | 1.309 | 1.425 | 1.440 | 1.361 | 1.488 | 1.204 | 1.322  | 1.224 | 1.221 | 1.419   | -0.64      | -          | 179.4      |
| 4     | <b>2f</b> | 1.412 | 1.366 | 1.308 | 1.425 | 1.439 | 1.361 | 1.489 | 1.204 | 1.322  | 1.224 | 1.220 | 1.419   | -3.20      | -          | 179.9      |
| 5     | <b>2k</b> | 1.413 | 1.366 | 1.311 | 1.426 | 1.439 | 1.359 | 1.503 | 1.208 | -      | 1.224 | 1.224 | 1.420   | -1.02      | -          | 179.1      |
| 6     | <b>3e</b> | 1.412 | 1.354 | 1.311 | 1.425 | 1.415 | 1.375 | 1.488 | 1.205 | 1.324  | 1.227 | 1.220 | 1.380   | 3.90       | 27.5       | 179.7      |
| 7     | <b>4b</b> | 1.365 | 1.366 | 1.356 | 1.488 | 1.542 | 1.468 | 1.437 | 1.236 | 1.334  | -     | -     | -       | 4.14       | -          | 117.6      |

**Table S10.** Selected non-covalent bonding lengths (in Å) and angles (*grad*) for the optimized geometries of compound **2a**, **e-g,k**, **3b** and **4b** in *GS* and *ES* in the mixture of  $\text{CHCl}_3$

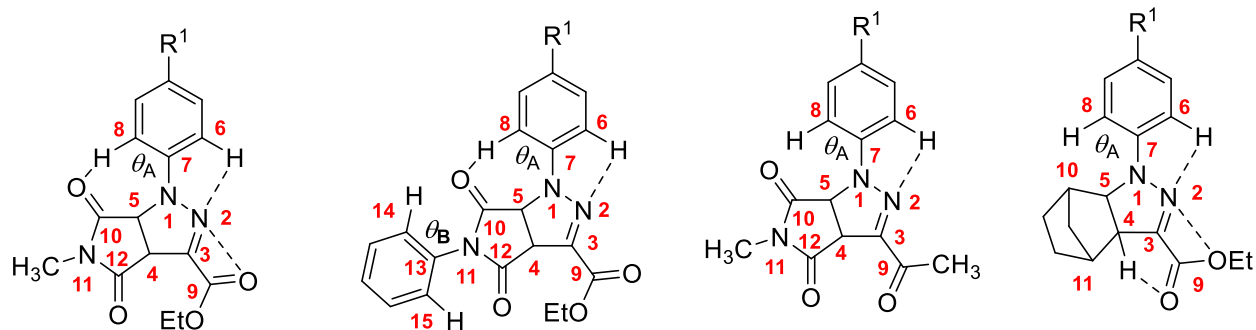

| Entry | Compd     | $S_0$  |           |         |          |            |            | $S_{1r}$ |           |         |            |            |            |
|-------|-----------|--------|-----------|---------|----------|------------|------------|----------|-----------|---------|------------|------------|------------|
|       |           | C6H-N2 | C8H-O=C10 | N2-O=C9 | N1N2O=C9 | C14H-O=C10 | C15H-O=C12 | C6H-N2   | C8H-O=C10 | N2-C9=O | C14H-C10=O | C14H-O=C10 | C15H-O=C12 |
| 1     | <b>2a</b> | 2.553  | 2.405     | 2.839   | 163.8    | -          | -          | 2.396    | 2.036     | 2.787   | 170.5      | -          | -          |
| 2     | <b>2d</b> | 2.533  | 2.373     | 2.838   | 163.8    | -          | -          | 2.404    | 2.141     | 2.080   | 169.2      | -          | -          |
| 3     | <b>2e</b> | 2.551  | 2.363     | 2.836   | 163.8    | -          | -          | 2.401    | 2.137     | 2.680   | 169.2      | -          | -          |
| 4     | <b>2f</b> | 2.506  | 2.342     | 2.834   | 163.9    |            |            | 2.401    | 2.137     | 2.680   | 169.2      | -          | -          |
| 5     | <b>2k</b> | 2/403  | 2.090     | -       | -        | -          | -          | 2.402    | 2.132     | -       | -          | -          | -          |
| 6     | <b>3e</b> | 2.395  | 2.095     | 2.794   | 166.6    | 2.205      | 2.213      | 2.396    | 2.093     | 2.829   | 164.4      | 2.833      | 2.852      |
| 7     | <b>4b</b> | 2.463  |           | 2.700   | 165.2    |            |            | 2.376    |           | 2.701   | 165.0      |            |            |

| Entry | Compd | $S_0$                                                                               | $S_{1v}$                                                                            | $S_{1r}$                                                                             |
|-------|-------|-------------------------------------------------------------------------------------|-------------------------------------------------------------------------------------|--------------------------------------------------------------------------------------|
| 1     | 2a    | 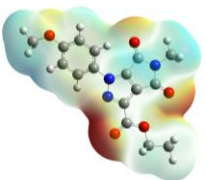   |    |    |
| 2     | 2e    |    |    |    |
| 3     | 2f    |    |    |    |
| 4     | 2g    |    |    |    |
| 5     | 2k    |   |   |   |
| 6     | 3b    |  |  |  |
| 7     | 4b    |  |  |  |

**Fig. S28.** Plot of MEPs of complexes **2a**, **e-g,k**, **3b** and **4b** calculated at (TD-)DFT  $\omega$ -B97X-D / 6-311++G\*\* // IEF-PCM(UFF) level of theory, for GS and ESs in  $\text{CHCl}_3$ . The red and blue colors correspond to negative and positive potential regions, respectively. Green color corresponds to the neutral region.

Legend of map colours: red (negative potential), blue (positive potential). Legend of elements: hydrogen (white), carbon (grey), nitrogen (blue), oxygen (red), sulphur (yellow), chlorine (

## 6. Reference

1. Gavlik, K. D.; Lesogorova, S. G.; Sukhorukova, E. S.; Subbotina, J. O.; Slepukhin, P. A.; Benassi, E.; Belskaya, N. P. Synthesis of 2-Aryl-1,2,3-triazoles by Oxidative Cyclization of 2-(Arylazo)ethane-1,1-diamines: A One-Pot Approach. *Eur. J. Org. Chem.* **2016**, *15*, 2700–2710.
2. Gavlik, K. D.; Sukhorukova, E. S.; Shafran, Y. M.; Slepukhin, P. A.; Benassi, E.; Belskaya, N. P. 2-Aryl-5-amino-1,2,3-triazoles: New effective blue-emitting fluorophores. *Dyes Pigm.* **2017**, *136*, 229-242.
3. Bel'skaya, N. P.; Demina, M. A.; Sapognikova, S. G.; Fan, Z.-J.; Zhang, H.-K.; Dehaen, W.; Bakulev, V. A. Synthesis and oxidative cyclization of 2-arylhydrazono-2-cyanoacetamidines to 5-amino-2-aryl-2H-[1,2,3]triazole-4-carbonitrile. *ARKIVOC.* **2008**, *xvi*, 9-21.
4. Belskaya, N. P.; Koksharov, A. V.; Eliseeva, A. I.; Fan, Z.; Bakulev, V. A. Synthesis and oxidative cyclization of 3-amino-2-arylazo-5-tert-cycloalkylaminothiophenes. *Chem. Heterocycl. Comp.* **2011**, *47*, 564-570.
5. O. V. Dolomanov, L. J. Bourhis, R. J. Gildea, J. A. K. Howard and H. Puschmann, *J. Appl. Cryst.* **2009**, *42*, 339-341.
6. L. Palatinus and G. Chapuis, *J. Appl. Cryst.* **2007**, *40*, 786-7903.
7. G.M. Sheldrick, *Acta Cryst.* **2008**, *A64*, 112-122.
8. A. D. Becke, *J. Chem. Phys.* **1993**, *98*, 5648-5652.
9. Y. Zhao, D. G. Truhlar, *Theor. Chem. Acc.* **2008**, *120*, 215-241.
10. T. Yanai, D. P. Tew, N. C. Handy, *Chem. Phys. Lett.* **2004**, *393*, 51-57.
11. J. D. Chai, M. Head-Gordon, *J. Chem. Phys.* **2008**, *128*, 084106-1 – 084106-15.
12. S. Grimme, S. Ehrlich, L. Goerigk, *J. Comput. Chem.* **2011**, *32*, 1456-1465.
13. J. Tomasi, B. Mennucci, E. Cancès, *J. Mol. Struct: Theochem.* **1999**, *464*, 211-226.
14. A. K. Rappé, C. J. Casewit, K. S. Colwell, W. A. Goddard, W. M. Skiff, *J. Am. Chem. Soc.* **1992**, *114*, 10024-10035.
15. A. V. Marenich, C. J. Cramer, D. G. Truhlar, *J. Phys. Chem. B* **2009**, *113*, 6378-96.
16. C. M. Breneman, K. B. Wiberg, *J. Comp. Chem.* **1990**, *11*, 361-373.
17. a) H. J. Bohórquez, C. F. Matta, R. J. Boyd, *Int. J. Quant. Chem.* **2010**, *110*, 2418-2425; b) E. R. Johnson, S. Keinan, P. Mori-Sánchez, J. Contreras-Garcia, A. J. Cohen, W. Yang, *J. Am. Chem. Soc.* **2010**, *132*, 6498-6506; c) P. Cacciani, P. Čermák, J. Cosléou, J. El Romh, J. Hovorka, M. Khelkhal, *Mol. Phys.*, **2014**, *18*, 2476-2485; d) J. Andres, S. Berski, J. Contreras-Garcia, P. Gonzalez-Navarrete, *J. Phys. Chem.* **2014**, *118*, 1663-1672.
18. E. Benassi. *J. Comput. Chem.* **2017**, *38*, 87–92.
19. M. J. Frisch, G. W. Trucks, H. B. Schlegel, G. E. Scuseria, M. A. Robb, J. R. Cheeseman, G. Scalmani, V. Barone, B. Mennucci, G. A. Petersson, H. Nakatsuji, M. Caricato, X. Li, H. P. Hratchian, A. F. Izmaylov, J. Bloino, G. Zheng, J. L. Sonnenberg, M. Hada, M. Ehara, K. Toyota, R. Fukuda, J. Hasegawa, M. Ishida, T. Nakajima, Y. Honda, O. Kitao, H. Nakai, T. Vreven, J. A. Montgomery Jr., J. E. Peralta, F. Ogliaro, M. Bearpark, J. J. Heyd, E. Brothers, K. N. Kudin, V. N. Staroverov, R. Kobayashi, J. Normand, K. Raghavachari, A. Rendell, J. C. Burant, S. S. Iyengar, J. Tomasi, J. M. Cossi, N. Rega, J. M. Millam, M. Klene, J. E. Knox, J. B. Cross, V. Bakken, C. Adamo, J. Jaramillo, R. Gomperts, R. E. Stratmann, O. Yazyev, A. J. Austin, R. Cammi, C. Pomelli, J. W. Ochterski, R. L. Martin, K. Morokuma, V. G. Zakrzewski, G. A. Voth, P. Salvador, J. J. Dannenberg, S. Dapprich, A. D. Daniels, O. Farkas, J. B. Foresman, J. V. Ortiz, J. Cioslowski, D. J. Fox. Gaussian09, revision D.01; Gaussian, Inc.: Wallingford, CT, 2009.

20. a) F. W. Biegler-König, R. F. W. Bader, T. H. Tang. *J. Comput. Chem.* **1982**, 3, 317-328; b) AIMPAC, <http://www.chemistry.mcmaster.ca/aimpac/imagemap/imagemap.htm>; c) N. Keith, Ph.D. Thesis, Ontario, Canada, 1993.



## 7. The Coordinates of compounds optimized at B3LYP/6-31G\*\*level

### Optimised Geometries (S<sub>0</sub>) in chloroform

Mol-2a/A\_s0\_chl.out

```
* SCF ENERGY / A.U. = -1158.72296531

  6      1.476105      1.665831      0.625846
  6      0.408921      2.581518      0.571799
  6     -0.718210      1.800112      0.606930
  6     -0.027218      3.995675      0.437118
  6     -1.943242      2.647603      0.490640
  6     -1.131770     -0.674082      0.730844
  6     -2.395839     -0.629485      1.321212
  6     -0.631652     -1.856871      0.199860
  6     -3.163292     -1.781417      1.366501
  1     -2.777811      0.295362      1.739442
  6     -1.398835     -3.018697      0.255089
  1      0.351814     -1.872792     -0.256603
  6     -2.669747     -2.982293      0.838361
  1     -4.148640     -1.774261      1.820330
  1     -0.998323     -3.934435     -0.162408
  7     -1.434611      3.938239      0.396020
  7     -0.332934      0.508399      0.679659
  7      1.003863      0.419013      0.695451
  8      0.599194      5.024466      0.366322
  8     -3.113700      2.341920      0.476962
  8     -3.491140     -4.053562      0.939287
  6      2.932646      1.952266      0.626393
  8      3.372421      3.080465      0.616549
  8      3.671082      0.848162      0.638029
  6      5.102305      1.045344      0.644869
  1      5.365702      1.628259      1.531916
  1      5.375163      1.622083     -0.243297
  6      5.743049     -0.322552      0.653032
  1      5.458190     -0.891570     -0.236079
  1      6.830899     -0.211907      0.658729
  1      5.447980     -0.885834      1.542386
  6     -3.027776     -5.298242      0.434935
  1     -3.832094     -6.010608      0.615843
  1     -2.829152     -5.237926     -0.640684
  1     -2.125238     -5.624980      0.962986
  6     -2.258931      5.127046      0.277587
  1     -2.066507      5.800395      1.115354
  1     -2.043670      5.642777     -0.660625
  1     -3.302233      4.811967      0.291275
```

Mol-2a/B\_s0\_chl.out

```
* SCF ENERGY / A.U. = -1158.72305162

  6      1.449555      1.693767      0.656341
  6      0.406094      2.637346      0.657233
  6     -0.740351      1.886128      0.596344
```

|   |           |           |           |
|---|-----------|-----------|-----------|
| 6 | 0.010214  | 4.068728  | 0.644308  |
| 6 | -1.939686 | 2.775062  | 0.522753  |
| 6 | -1.211999 | -0.580617 | 0.493695  |
| 6 | -2.503501 | -0.545037 | 1.001208  |
| 6 | -0.699660 | -1.743914 | -0.087042 |
| 6 | -3.312108 | -1.678261 | 0.919661  |
| 1 | -2.892321 | 0.358550  | 1.457805  |
| 6 | -1.498474 | -2.871577 | -0.158906 |
| 1 | 0.311352  | -1.755318 | -0.478195 |
| 6 | -2.810328 | -2.845659 | 0.337956  |
| 1 | -4.318003 | -1.634071 | 1.318169  |
| 1 | -1.127292 | -3.787107 | -0.607513 |
| 7 | -1.396475 | 4.054252  | 0.560467  |
| 7 | -0.387357 | 0.582992  | 0.565358  |
| 7 | 0.945956  | 0.458561  | 0.604842  |
| 8 | 0.664453  | 5.081346  | 0.690352  |
| 8 | -3.117020 | 2.506068  | 0.446982  |
| 8 | -3.512812 | -3.995694 | 0.209475  |
| 6 | 2.912039  | 1.943171  | 0.707028  |
| 8 | 3.378348  | 3.060137  | 0.745761  |
| 8 | 3.622878  | 0.821158  | 0.702869  |
| 6 | 5.058023  | 0.981825  | 0.746706  |
| 1 | 5.315243  | 1.544458  | 1.648469  |
| 1 | 5.365741  | 1.564685  | -0.125983 |
| 6 | 5.664044  | -0.401784 | 0.748652  |
| 1 | 5.381896  | -0.952361 | -0.152804 |
| 1 | 6.754070  | -0.318749 | 0.776013  |
| 1 | 5.338067  | -0.968534 | 1.624843  |
| 6 | -4.850199 | -4.017695 | 0.689421  |
| 1 | -5.223121 | -5.021248 | 0.486983  |
| 1 | -4.883288 | -3.826830 | 1.767580  |
| 1 | -5.469372 | -3.284228 | 0.161400  |
| 6 | -2.186360 | 5.271466  | 0.528118  |
| 1 | -1.977974 | 5.874387  | 1.414276  |
| 1 | -1.953086 | 5.849735  | -0.368562 |
| 1 | -3.238346 | 4.986682  | 0.516667  |

**Mol-2a/C\_s0\_ch1.out**

\* SCF ENERGY / A.U. = -1158.72385828

|   |           |           |           |
|---|-----------|-----------|-----------|
| 6 | 1.426432  | 1.584180  | 0.664740  |
| 6 | 0.380536  | 2.521926  | 0.591937  |
| 6 | -0.764218 | 1.765894  | 0.616589  |
| 6 | -0.019092 | 3.945413  | 0.447841  |
| 6 | -1.966855 | 2.642222  | 0.482049  |
| 6 | -1.229373 | -0.699572 | 0.743704  |
| 6 | -2.506067 | -0.624866 | 1.302702  |
| 6 | -0.740195 | -1.896133 | 0.233652  |
| 6 | -3.297411 | -1.760963 | 1.338223  |
| 1 | -2.879312 | 0.311030  | 1.704009  |
| 6 | -1.531924 | -3.041699 | 0.278891  |
| 1 | 0.253785  | -1.935273 | -0.197860 |
| 6 | -2.815466 | -2.975446 | 0.830877  |
| 1 | -4.293066 | -1.730791 | 1.767907  |
| 1 | -1.139909 | -3.968751 | -0.121306 |
| 7 | -1.425963 | 3.920819  | 0.385606  |
| 7 | -0.406324 | 0.466574  | 0.701249  |

|   |           |           |           |
|---|-----------|-----------|-----------|
| 7 | 0.927494  | 0.349196  | 0.734982  |
| 8 | 0.634289  | 4.958526  | 0.385722  |
| 8 | -3.144460 | 2.366849  | 0.457655  |
| 8 | -3.659819 | -4.029837 | 0.919841  |
| 6 | 2.897828  | 1.785062  | 0.676509  |
| 8 | 3.711303  | 0.890543  | 0.719184  |
| 8 | 3.185147  | 3.081598  | 0.632123  |
| 6 | 4.584642  | 3.435230  | 0.635464  |
| 1 | 5.055766  | 2.986868  | -0.244075 |
| 1 | 5.046316  | 3.010596  | 1.531430  |
| 6 | 4.660526  | 4.943676  | 0.615671  |
| 1 | 4.172738  | 5.368201  | 1.497080  |
| 1 | 5.708813  | 5.254398  | 0.614178  |
| 1 | 4.176359  | 5.345224  | -0.278345 |
| 6 | -3.209520 | -5.285920 | 0.431919  |
| 1 | -4.028822 | -5.983313 | 0.603622  |
| 1 | -2.991252 | -5.236119 | -0.640433 |
| 1 | -2.321805 | -5.624371 | 0.977227  |
| 6 | -2.220923 | 5.127754  | 0.251549  |
| 1 | -2.047841 | 5.788342  | 1.103751  |
| 1 | -1.959062 | 5.648602  | -0.671763 |
| 1 | -3.270183 | 4.834412  | 0.221514  |

Mol-2a/D\_s0\_ch1.out

\* SCF ENERGY / A.U. = -1158.72391329

|   |           |           |           |
|---|-----------|-----------|-----------|
| 6 | 1.381041  | 1.608729  | 0.490469  |
| 6 | 0.360265  | 2.568036  | 0.617815  |
| 6 | -0.799642 | 1.835930  | 0.656324  |
| 6 | 0.000035  | 3.998776  | 0.789632  |
| 6 | -1.973525 | 2.736668  | 0.864941  |
| 6 | -1.321264 | -0.619665 | 0.566617  |
| 6 | -2.627405 | -0.518800 | 0.108031  |
| 6 | -0.818795 | -1.832037 | 1.046944  |
| 6 | -3.460556 | -1.636846 | 0.137037  |
| 1 | -3.008233 | 0.424025  | -0.269334 |
| 6 | -1.642294 | -2.943905 | 1.066352  |
| 1 | 0.203937  | -1.893950 | 1.401413  |
| 6 | -2.968683 | -2.853249 | 0.618242  |
| 1 | -4.477709 | -1.542596 | -0.222427 |
| 1 | -1.279827 | -3.897002 | 1.437038  |
| 7 | -1.401368 | 4.003327  | 0.931508  |
| 7 | -0.473437 | 0.529308  | 0.555280  |
| 7 | 0.853763  | 0.384078  | 0.450108  |
| 8 | 0.677141  | 4.997618  | 0.819600  |
| 8 | -3.153248 | 2.486164  | 0.960447  |
| 8 | -3.693541 | -3.994203 | 0.689608  |
| 6 | 2.853206  | 1.781997  | 0.402851  |
| 8 | 3.646523  | 0.873486  | 0.309187  |
| 8 | 3.167345  | 3.072520  | 0.444133  |
| 6 | 4.571715  | 3.397902  | 0.369605  |
| 1 | 4.978467  | 2.965483  | -0.548849 |
| 1 | 5.077365  | 2.938029  | 1.223709  |
| 6 | 4.680243  | 4.904215  | 0.386968  |
| 1 | 4.248926  | 5.314385  | 1.303797  |
| 1 | 5.733863  | 5.192639  | 0.338370  |
| 1 | 4.159550  | 5.340793  | -0.469346 |

|   |           |           |           |
|---|-----------|-----------|-----------|
| 6 | -5.053835 | -3.949191 | 0.281805  |
| 1 | -5.444193 | -4.954763 | 0.435888  |
| 1 | -5.623508 | -3.238696 | 0.890740  |
| 1 | -5.139226 | -3.684756 | -0.777718 |
| 6 | -2.160208 | 5.225529  | 1.123525  |
| 1 | -1.834412 | 5.729176  | 2.035994  |
| 1 | -2.020857 | 5.892505  | 0.270204  |
| 1 | -3.212436 | 4.954850  | 1.209974  |

**Mol-2a/E\_s0\_ch1.out**

\* SCF ENERGY / A.U. = -1158.71147446

|   |           |           |           |
|---|-----------|-----------|-----------|
| 6 | 1.293925  | 1.377510  | -0.238828 |
| 6 | 0.352823  | 2.341191  | 0.165829  |
| 6 | -0.795227 | 1.629701  | 0.401421  |
| 6 | 0.090977  | 3.757722  | 0.523816  |
| 6 | -1.868539 | 2.534661  | 0.916217  |
| 6 | -1.420303 | -0.795883 | 0.220539  |
| 6 | -2.791067 | -0.623205 | 0.020244  |
| 6 | -0.890136 | -2.051487 | 0.491120  |
| 6 | -3.631397 | -1.720444 | 0.105143  |
| 1 | -3.198603 | 0.357728  | -0.199310 |
| 6 | -1.733590 | -3.158152 | 0.564086  |
| 1 | 0.176752  | -2.168157 | 0.647199  |
| 6 | -3.109871 | -2.993418 | 0.374803  |
| 1 | -4.700236 | -1.613567 | -0.046872 |
| 1 | -1.306913 | -4.130965 | 0.775375  |
| 7 | -1.252790 | 3.781291  | 0.946479  |
| 7 | -0.546795 | 0.330251  | 0.137100  |
| 7 | 0.726492  | 0.169301  | -0.254434 |
| 8 | 0.804399  | 4.730615  | 0.506166  |
| 8 | -3.008606 | 2.295995  | 1.242097  |
| 8 | -4.011912 | -4.000539 | 0.431340  |
| 6 | 2.684878  | 1.628108  | -0.719824 |
| 8 | 2.949227  | 2.675781  | -1.263429 |
| 8 | 3.626284  | 0.698172  | -0.573850 |
| 6 | 3.486490  | -0.470826 | 0.268399  |
| 1 | 2.941163  | -1.235719 | -0.288516 |
| 1 | 2.919343  | -0.207734 | 1.164692  |
| 6 | 4.886034  | -0.922916 | 0.616878  |
| 1 | 5.418099  | -0.145506 | 1.171420  |
| 1 | 4.832043  | -1.821190 | 1.238550  |
| 1 | 5.452569  | -1.161501 | -0.286973 |
| 6 | -3.530937 | -5.314392 | 0.677884  |
| 1 | -3.034303 | -5.375705 | 1.652145  |
| 1 | -4.409326 | -5.959008 | 0.677679  |
| 1 | -2.842935 | -5.634819 | -0.111874 |
| 6 | -1.909589 | 4.999284  | 1.385260  |
| 1 | -1.419536 | 5.391492  | 2.279063  |
| 1 | -1.873840 | 5.748141  | 0.591464  |
| 1 | -2.946945 | 4.754856  | 1.613528  |

**Mol-2a/F\_s0\_ch1.out**

\* SCF ENERGY / A.U. = -1158.71163960

|   |          |          |           |
|---|----------|----------|-----------|
| 6 | 1.315572 | 1.416439 | -0.033084 |
|---|----------|----------|-----------|

|   |           |           |           |
|---|-----------|-----------|-----------|
| 6 | 0.360554  | 2.406277  | 0.262431  |
| 6 | -0.825129 | 1.726171  | 0.371495  |
| 6 | 0.079457  | 3.847550  | 0.480932  |
| 6 | -1.945877 | 2.679495  | 0.637524  |
| 6 | -1.480601 | -0.691639 | 0.139073  |
| 6 | -2.628295 | -0.657502 | 0.919155  |
| 6 | -1.179968 | -1.805613 | -0.649390 |
| 6 | -3.502878 | -1.743640 | 0.913372  |
| 1 | -2.853232 | 0.208581  | 1.532085  |
| 6 | -2.042535 | -2.887766 | -0.647648 |
| 1 | -0.281111 | -1.815168 | -1.255703 |
| 6 | -3.209210 | -2.864125 | 0.131329  |
| 1 | -4.395447 | -1.702452 | 1.525359  |
| 1 | -1.834250 | -3.764858 | -1.251530 |
| 7 | -1.313870 | 3.917071  | 0.681396  |
| 7 | -0.581437 | 0.417835  | 0.146975  |
| 7 | 0.722866  | 0.222154  | -0.094560 |
| 8 | 0.808103  | 4.808486  | 0.510346  |
| 8 | -3.129449 | 2.479380  | 0.788162  |
| 8 | -3.987904 | -3.968803 | 0.061524  |
| 6 | 2.756438  | 1.635723  | -0.354785 |
| 8 | 3.108223  | 2.703535  | -0.801842 |
| 8 | 3.648268  | 0.663690  | -0.177010 |
| 6 | 3.392467  | -0.549698 | 0.571516  |
| 1 | 2.831063  | -1.239606 | -0.061030 |
| 1 | 2.795090  | -0.310538 | 1.454849  |
| 6 | 4.742012  | -1.112775 | 0.953104  |
| 1 | 5.293736  | -0.409319 | 1.582121  |
| 1 | 4.600291  | -2.043148 | 1.510425  |
| 1 | 5.336926  | -1.330082 | 0.062162  |
| 6 | -5.170705 | -3.999901 | 0.848473  |
| 1 | -5.859263 | -3.199711 | 0.556296  |
| 1 | -5.633779 | -4.966689 | 0.653817  |
| 1 | -4.934331 | -3.917138 | 1.914966  |
| 6 | -2.001664 | 5.169332  | 0.937545  |
| 1 | -1.625591 | 5.624710  | 1.856152  |
| 1 | -1.850288 | 5.856354  | 0.102679  |
| 1 | -3.064080 | 4.950485  | 1.044216  |

Mol-2a/G\_s0\_ch1.out

\* SCF ENERGY / A.U. = -1158.71143733

|   |           |           |           |
|---|-----------|-----------|-----------|
| 6 | 1.349930  | 1.387202  | 1.170208  |
| 6 | 0.358458  | 2.360788  | 0.942678  |
| 6 | -0.789373 | 1.644305  | 0.723258  |
| 6 | 0.012836  | 3.803460  | 0.862163  |
| 6 | -1.946279 | 2.566252  | 0.509425  |
| 6 | -1.346457 | -0.805087 | 0.699138  |
| 6 | -2.447577 | -0.751992 | -0.156914 |
| 6 | -1.061010 | -1.952486 | 1.428775  |
| 6 | -3.272601 | -1.858889 | -0.267540 |
| 1 | -2.659038 | 0.145110  | -0.729163 |
| 6 | -1.884451 | -3.069950 | 1.309768  |
| 1 | -0.203296 | -1.972860 | 2.092395  |
| 6 | -2.995789 | -3.024266 | 0.461074  |
| 1 | -4.135119 | -1.844420 | -0.925576 |
| 1 | -1.653547 | -3.956949 | 1.886835  |

|   |           |           |           |
|---|-----------|-----------|-----------|
| 7 | -1.375661 | 3.829033  | 0.617735  |
| 7 | -0.492424 | 0.332218  | 0.824785  |
| 7 | 0.810710  | 0.167978  | 1.091230  |
| 8 | 0.690882  | 4.795656  | 0.962425  |
| 8 | -3.111739 | 2.326731  | 0.290967  |
| 8 | -3.856279 | -4.053015 | 0.279278  |
| 6 | 2.771909  | 1.654127  | 1.536926  |
| 8 | 3.068351  | 2.735713  | 1.991762  |
| 8 | 3.710210  | 0.721520  | 1.387596  |
| 6 | 3.531020  | -0.522221 | 0.668493  |
| 1 | 2.964289  | -0.332909 | -0.246142 |
| 1 | 2.968155  | -1.213508 | 1.298433  |
| 6 | 4.915810  | -1.045857 | 0.364769  |
| 1 | 5.478397  | -1.210751 | 1.287436  |
| 1 | 4.832607  | -1.998650 | -0.165768 |
| 1 | 5.468702  | -0.343183 | -0.264043 |
| 6 | -3.603291 | -5.264894 | 0.976631  |
| 1 | -3.628954 | -5.107812 | 2.060393  |
| 1 | -4.403388 | -5.946832 | 0.690688  |
| 1 | -2.637419 | -5.691121 | 0.684144  |
| 6 | -2.114600 | 5.068325  | 0.459317  |
| 1 | -1.932434 | 5.716484  | 1.318277  |
| 1 | -1.807848 | 5.581089  | -0.455301 |
| 1 | -3.174726 | 4.821295  | 0.404272  |

Mol-2a/H\_s0\_ch1.out

\* SCF ENERGY / A.U. = -1158.71173590

|   |           |           |           |
|---|-----------|-----------|-----------|
| 6 | 1.257988  | 1.401712  | 1.394669  |
| 6 | 0.332573  | 2.379247  | 0.987222  |
| 6 | -0.823720 | 1.684412  | 0.742596  |
| 6 | 0.093609  | 3.799614  | 0.629176  |
| 6 | -1.881061 | 2.605471  | 0.223969  |
| 6 | -1.480370 | -0.734660 | 0.910317  |
| 6 | -2.844264 | -0.551722 | 1.093835  |
| 6 | -0.955088 | -2.000493 | 0.637336  |
| 6 | -3.709446 | -1.640534 | 0.992267  |
| 1 | -3.244563 | 0.432128  | 1.314208  |
| 6 | -1.811641 | -3.083437 | 0.548908  |
| 1 | 0.112280  | -2.126994 | 0.493369  |
| 6 | -3.193291 | -2.910905 | 0.721535  |
| 1 | -4.771342 | -1.482593 | 1.135336  |
| 1 | -1.431680 | -4.077206 | 0.336078  |
| 7 | -1.247213 | 3.843018  | 0.198106  |
| 7 | -0.594672 | 0.380937  | 1.004797  |
| 7 | 0.673955  | 0.201461  | 1.403276  |
| 8 | 0.820932  | 4.761985  | 0.652278  |
| 8 | -3.023427 | 2.384102  | -0.106719 |
| 8 | -3.945359 | -4.030077 | 0.608280  |
| 6 | 2.650171  | 1.633291  | 1.881608  |
| 8 | 2.925320  | 2.677257  | 2.427169  |
| 8 | 3.580472  | 0.692339  | 1.737095  |
| 6 | 3.426466  | -0.477334 | 0.897943  |
| 1 | 2.864453  | -0.209394 | -0.000139 |
| 1 | 2.869859  | -1.233016 | 1.456247  |
| 6 | 4.820280  | -0.949339 | 0.553117  |
| 1 | 5.382445  | -1.192349 | 1.458510  |

|   |           |           |           |
|---|-----------|-----------|-----------|
| 1 | 4.754587  | -1.849102 | -0.065270 |
| 1 | 5.363387  | -0.181268 | -0.003730 |
| 6 | -5.353063 | -3.904329 | 0.755257  |
| 1 | -5.768460 | -3.233477 | -0.004390 |
| 1 | -5.758450 | -4.906055 | 0.616174  |
| 1 | -5.613257 | -3.542153 | 1.755722  |
| 6 | -1.882879 | 5.070454  | -0.245487 |
| 1 | -1.844560 | 5.818298  | 0.549169  |
| 1 | -1.378723 | 5.456384  | -1.134164 |
| 1 | -2.921211 | 4.840393  | -0.483969 |

**Mol-2e/A\_s0\_ch1.out**

\* SCF ENERGY / A.U. = -1503.80737453

|    |           |           |           |
|----|-----------|-----------|-----------|
| 6  | 1.446630  | 1.689501  | 0.643044  |
| 6  | 0.401960  | 2.633725  | 0.649084  |
| 6  | -0.743966 | 1.884879  | 0.586719  |
| 6  | 0.007754  | 4.066498  | 0.648928  |
| 6  | -1.943580 | 2.777036  | 0.521445  |
| 6  | -1.210556 | -0.584128 | 0.476997  |
| 6  | -2.511832 | -0.538583 | 0.969025  |
| 6  | -0.683255 | -1.747851 | -0.079804 |
| 6  | -3.307652 | -1.677341 | 0.892719  |
| 1  | -2.909338 | 0.370041  | 1.407065  |
| 6  | -1.476070 | -2.887894 | -0.145189 |
| 1  | 0.332277  | -1.759457 | -0.458055 |
| 6  | -2.780538 | -2.839660 | 0.339506  |
| 1  | -4.323981 | -1.658299 | 1.270123  |
| 1  | -1.083466 | -3.802367 | -0.576198 |
| 7  | -1.399090 | 4.054183  | 0.568302  |
| 7  | -0.389983 | 0.580839  | 0.548075  |
| 7  | 0.944743  | 0.456136  | 0.584491  |
| 8  | 0.664415  | 5.076491  | 0.702345  |
| 8  | -3.120457 | 2.507799  | 0.444146  |
| 6  | 2.909688  | 1.940358  | 0.698115  |
| 8  | 3.372551  | 3.058236  | 0.739546  |
| 8  | 3.620601  | 0.819230  | 0.695232  |
| 6  | 5.056054  | 0.980317  | 0.746579  |
| 1  | 5.307845  | 1.542014  | 1.650414  |
| 1  | 5.367553  | 1.564312  | -0.123928 |
| 6  | 5.662274  | -0.403096 | 0.750177  |
| 1  | 5.385151  | -0.952813 | -0.153360 |
| 1  | 6.752073  | -0.319578 | 0.783226  |
| 1  | 5.332161  | -0.970765 | 1.624212  |
| 6  | -2.187824 | 5.272859  | 0.545668  |
| 1  | -1.974430 | 5.870250  | 1.434275  |
| 1  | -1.957341 | 5.855212  | -0.349002 |
| 1  | -3.240187 | 4.989533  | 0.537418  |
| 17 | -3.776190 | -4.270938 | 0.253446  |

**Mol-2e/B\_s0\_ch1.out**

\* SCF ENERGY / A.U. = -1503.80829451

|   |           |          |          |
|---|-----------|----------|----------|
| 6 | 1.381317  | 1.602300 | 0.511772 |
| 6 | 0.359055  | 2.562869 | 0.632260 |
| 6 | -0.800568 | 1.833247 | 0.668137 |

|    |           |           |           |
|----|-----------|-----------|-----------|
| 6  | -0.000112 | 3.995959  | 0.794424  |
| 6  | -1.975482 | 2.738037  | 0.865946  |
| 6  | -1.318053 | -0.624746 | 0.582314  |
| 6  | -2.631390 | -0.513537 | 0.135087  |
| 6  | -0.804331 | -1.836876 | 1.039357  |
| 6  | -3.453537 | -1.635876 | 0.155028  |
| 1  | -3.017808 | 0.433779  | -0.223827 |
| 6  | -1.624243 | -2.959583 | 1.049584  |
| 1  | 0.221656  | -1.899853 | 1.383018  |
| 6  | -2.940779 | -2.846043 | 0.610731  |
| 1  | -4.479615 | -1.566707 | -0.188878 |
| 1  | -1.243244 | -3.911287 | 1.403437  |
| 7  | -1.402108 | 4.003047  | 0.929153  |
| 7  | -0.473175 | 0.525029  | 0.574400  |
| 7  | 0.855765  | 0.378861  | 0.476344  |
| 8  | 0.679008  | 4.992795  | 0.821890  |
| 8  | -3.155318 | 2.487611  | 0.956283  |
| 6  | 2.854373  | 1.776873  | 0.422781  |
| 8  | 3.647546  | 0.867782  | 0.338087  |
| 8  | 3.164863  | 3.067766  | 0.450231  |
| 6  | 4.568414  | 3.397248  | 0.368077  |
| 1  | 4.972308  | 2.959273  | -0.548989 |
| 1  | 5.078351  | 2.945013  | 1.223638  |
| 6  | 4.671487  | 4.903960  | 0.374044  |
| 1  | 4.243386  | 5.319184  | 1.290074  |
| 1  | 5.723803  | 5.195653  | 0.318008  |
| 1  | 4.145012  | 5.332404  | -0.482840 |
| 6  | -2.160374 | 5.227829  | 1.109899  |
| 1  | -1.839396 | 5.735253  | 2.021898  |
| 1  | -2.013669 | 5.889459  | 0.253757  |
| 1  | -3.213595 | 4.959473  | 1.190718  |
| 17 | -3.971215 | -4.254812 | 0.631348  |

Mol-2e/C\_s0\_ch1.out

\* SCF ENERGY / A.U. = -1503.79579992

|   |           |           |           |
|---|-----------|-----------|-----------|
| 6 | 1.306371  | 1.409538  | -0.035227 |
| 6 | 0.353473  | 2.398803  | 0.273614  |
| 6 | -0.831018 | 1.721209  | 0.394419  |
| 6 | 0.080209  | 3.842052  | 0.492869  |
| 6 | -1.946351 | 2.682196  | 0.673294  |
| 6 | -1.482962 | -0.700295 | 0.142444  |
| 6 | -2.686748 | -0.627734 | 0.837407  |
| 6 | -1.124161 | -1.842763 | -0.571263 |
| 6 | -3.551526 | -1.717695 | 0.816156  |
| 1 | -2.957769 | 0.264742  | 1.390044  |
| 6 | -1.985119 | -2.934015 | -0.583578 |
| 1 | -0.185417 | -1.876484 | -1.111344 |
| 6 | -3.190887 | -2.859476 | 0.108573  |
| 1 | -4.493202 | -1.676726 | 1.352273  |
| 1 | -1.722382 | -3.830622 | -1.134235 |
| 7 | -1.309731 | 3.915903  | 0.710320  |
| 7 | -0.588719 | 0.411623  | 0.160120  |
| 7 | 0.714385  | 0.217645  | -0.096153 |
| 8 | 0.812911  | 4.799514  | 0.509552  |
| 8 | -3.129078 | 2.488213  | 0.836888  |
| 6 | 2.743954  | 1.631475  | -0.374540 |



|    |           |           |           |
|----|-----------|-----------|-----------|
| 8  | 3.084632  | 2.698424  | -0.830993 |
| 8  | 3.639884  | 0.663246  | -0.203003 |
| 6  | 3.395426  | -0.548230 | 0.552673  |
| 1  | 2.832022  | -1.242788 | -0.073192 |
| 1  | 2.804608  | -0.307917 | 1.440076  |
| 6  | 4.750468  | -1.104090 | 0.924805  |
| 1  | 5.304036  | -0.395941 | 1.546836  |
| 1  | 4.617465  | -2.033170 | 1.486333  |
| 1  | 5.338823  | -1.321508 | 0.029576  |
| 6  | -1.991872 | 5.171106  | 0.969877  |
| 1  | -1.578605 | 5.643969  | 1.863049  |
| 1  | -1.878851 | 5.842781  | 0.116609  |
| 1  | -3.047765 | 4.950758  | 1.125988  |
| 17 | -4.272235 | -4.229140 | 0.088103  |

Mol-2e/D\_s0\_ch1.out

\* SCF ENERGY / A.U. = -1503.79578023

|    |           |           |           |
|----|-----------|-----------|-----------|
| 6  | 1.255632  | 1.390646  | 1.382043  |
| 6  | 0.329057  | 2.370309  | 0.978440  |
| 6  | -0.828045 | 1.679580  | 0.734782  |
| 6  | 0.092151  | 3.794693  | 0.632123  |
| 6  | -1.886970 | 2.609421  | 0.228853  |
| 6  | -1.480006 | -0.743717 | 0.899266  |
| 6  | -2.851452 | -0.547783 | 1.035332  |
| 6  | -0.944524 | -2.012098 | 0.682617  |
| 6  | -3.706719 | -1.641115 | 0.941994  |
| 1  | -3.258030 | 0.442154  | 1.209545  |
| 6  | -1.799527 | -3.105071 | 0.601217  |
| 1  | 0.126399  | -2.142318 | 0.577290  |
| 6  | -3.171824 | -2.907398 | 0.729262  |
| 1  | -4.777740 | -1.505911 | 1.044114  |
| 1  | -1.401585 | -4.099945 | 0.433644  |
| 7  | -1.250236 | 3.844148  | 0.207680  |
| 7  | -0.597494 | 0.373228  | 0.990935  |
| 7  | 0.673609  | 0.191713  | 1.385176  |
| 8  | 0.822770  | 4.753729  | 0.659669  |
| 8  | -3.031943 | 2.392998  | -0.094913 |
| 6  | 2.645931  | 1.623975  | 1.877036  |
| 8  | 2.910892  | 2.664804  | 2.432722  |
| 8  | 3.580298  | 0.688752  | 1.729688  |
| 6  | 3.433967  | -0.476393 | 0.882600  |
| 1  | 2.875537  | -0.204378 | -0.016486 |
| 1  | 2.877249  | -1.237094 | 1.434081  |
| 6  | 4.831038  | -0.941478 | 0.541983  |
| 1  | 5.388958  | -1.189116 | 1.448716  |
| 1  | 4.771927  | -1.836804 | -0.083387 |
| 1  | 5.374439  | -0.167402 | -0.006152 |
| 6  | -1.886415 | 5.076761  | -0.221983 |
| 1  | -1.844868 | 5.816453  | 0.580024  |
| 1  | -1.384163 | 5.470306  | -1.108280 |
| 1  | -2.925597 | 4.849914  | -0.459615 |
| 17 | -4.244582 | -4.279995 | 0.624868  |

Mol-2f/A\_s0\_ch1.out

```
* SCF ENERGY / A.U. = -1381.19234981

 6      1.443341      1.688712      0.636372
 6      0.398264      2.633592      0.649978
 6     -0.747827      1.886705      0.585351
 6      0.006170      4.067286      0.659424
 6     -1.946982      2.781670      0.528450
 6     -1.211296     -0.583848      0.460518
 6     -2.516450     -0.537436      0.939437
 6     -0.670671     -1.747244     -0.089744
 6     -3.305949     -1.681506      0.858586
 1     -2.918295      0.372198      1.370691
 6     -1.462029     -2.884695     -0.157032
 1      0.348631     -1.753001     -0.456809
 6     -2.775672     -2.846505      0.314343
 1     -4.324930     -1.659033      1.228291
 1     -1.058964     -3.798811     -0.582485
 7     -1.400712      4.057316      0.582067
 7     -0.393765      0.581966      0.536581
 7      0.941893      0.456955      0.569355
 8      0.665016      5.075325      0.717179
 8     -3.124152      2.514118      0.452130
 6      2.906972      1.938937      0.693120
 8      3.369314      3.056701      0.738154
 8      3.616713      0.817518      0.688106
 6      5.052516      0.976824      0.742490
 1      5.302902      1.537810      1.647130
 1      5.366284      1.560799     -0.127187
 6      5.656806     -0.407392      0.746821
 1      5.380758     -0.956513     -0.157399
 1      6.746634     -0.325293      0.782013
 1      5.324287     -0.974810      1.620098
 6     -2.187724      5.277424      0.566222
 1     -1.969407      5.871658      1.455687
 1     -1.959896      5.861829     -0.327773
 1     -3.240552      4.995869      0.561662
 6     -3.594972     -4.101834      0.236867
 9     -4.857209     -3.924084      0.657209
 9     -3.662511     -4.583218     -1.020772
 9     -3.067354     -5.091109      0.987797
```

Mol-2f/B\_s0\_ch1.out

```
* SCF ENERGY / A.U. = -1381.19325217

 6      1.379271      1.600887      0.528686
 6      0.355891      2.562431      0.641155
 6     -0.803419      1.833998      0.678900
 6     -0.002865      3.997203      0.792803
 6     -1.978972      2.741328      0.867565
 6     -1.317439     -0.626267      0.605093
 6     -2.630867     -0.515232      0.161062
 6     -0.794291     -1.837504      1.060352
 6     -3.447037     -1.643184      0.179756
 1     -3.018414      0.432497     -0.194682
 6     -1.613149     -2.957504      1.067932
```

|   |           |           |           |
|---|-----------|-----------|-----------|
| 1 | 0.232820  | -1.893996 | 1.400647  |
| 6 | -2.935402 | -2.855205 | 0.631297  |
| 1 | -4.472602 | -1.570998 | -0.164311 |
| 1 | -1.225072 | -3.908594 | 1.419726  |
| 7 | -1.405065 | 4.005967  | 0.924008  |
| 7 | -0.475133 | 0.524436  | 0.595541  |
| 7 | 0.854945  | 0.377891  | 0.502106  |
| 8 | 0.677233  | 4.993196  | 0.814966  |
| 8 | -3.158882 | 2.491416  | 0.956209  |
| 6 | 2.852866  | 1.774891  | 0.438049  |
| 8 | 3.645184  | 0.864374  | 0.363554  |
| 8 | 3.162952  | 3.065718  | 0.450205  |
| 6 | 4.566730  | 3.394070  | 0.362066  |
| 1 | 4.966973  | 2.950891  | -0.554113 |
| 1 | 5.078883  | 2.945777  | 1.218319  |
| 6 | 4.670749  | 4.900663  | 0.359845  |
| 1 | 4.247172  | 5.320823  | 1.275709  |
| 1 | 5.723038  | 5.191175  | 0.297611  |
| 1 | 4.140830  | 5.325134  | -0.496892 |
| 6 | -2.162860 | 5.232763  | 1.094294  |
| 1 | -1.843861 | 5.745869  | 2.003772  |
| 1 | -2.012783 | 5.888138  | 0.233973  |
| 1 | -3.216553 | 4.966003  | 1.173890  |
| 6 | -3.785742 | -4.092376 | 0.645686  |
| 9 | -3.852352 | -4.642790 | 1.874873  |
| 9 | -3.291967 | -5.049721 | -0.166458 |
| 9 | -5.047626 | -3.859154 | 0.251881  |

Mol-2f/C\_s0\_ch1.out

\* SCF ENERGY / A.U. = -1381.18061856

|   |           |           |           |
|---|-----------|-----------|-----------|
| 6 | 1.303028  | 1.410810  | -0.045842 |
| 6 | 0.350962  | 2.398855  | 0.273152  |
| 6 | -0.833727 | 1.722624  | 0.389979  |
| 6 | 0.081258  | 3.841101  | 0.505760  |
| 6 | -1.947280 | 2.684425  | 0.678347  |
| 6 | -1.484781 | -0.698445 | 0.123514  |
| 6 | -2.692208 | -0.621177 | 0.809578  |
| 6 | -1.114098 | -1.845047 | -0.581706 |
| 6 | -3.550754 | -1.717197 | 0.791591  |
| 1 | -2.967749 | 0.275991  | 1.351684  |
| 6 | -1.972792 | -2.934726 | -0.586791 |
| 1 | -0.171711 | -1.876309 | -1.114780 |
| 6 | -3.187518 | -2.866777 | 0.098205  |
| 1 | -4.494159 | -1.668342 | 1.323651  |
| 1 | -1.699091 | -3.833942 | -1.130435 |
| 7 | -1.308096 | 3.915948  | 0.725365  |
| 7 | -0.592954 | 0.414135  | 0.142377  |
| 7 | 0.710476  | 0.221229  | -0.117883 |
| 8 | 0.816602  | 4.796061  | 0.530168  |
| 8 | -3.130108 | 2.491295  | 0.841061  |
| 6 | 2.741705  | 1.633694  | -0.382108 |
| 8 | 3.082324  | 2.702007  | -0.834877 |
| 8 | 3.636626  | 0.664976  | -0.211037 |
| 6 | 3.389751  | -0.548761 | 0.540648  |
| 1 | 2.828304  | -1.241395 | -0.089092 |
| 1 | 2.796405  | -0.310677 | 1.426990  |

|   |           |           |           |
|---|-----------|-----------|-----------|
| 6 | 4.743548  | -1.105825 | 0.915269  |
| 1 | 5.295258  | -0.399621 | 1.541123  |
| 1 | 4.608657  | -2.036533 | 1.473627  |
| 1 | 5.334534  | -1.320708 | 0.021189  |
| 6 | -1.986953 | 5.170033  | 0.999566  |
| 1 | -1.574380 | 5.629859  | 1.899847  |
| 1 | -1.869489 | 5.852142  | 0.155304  |
| 1 | -3.043902 | 4.951049  | 1.150150  |
| 6 | -4.082157 | -4.072424 | 0.084556  |
| 9 | -5.252122 | -3.856767 | 0.705726  |
| 9 | -3.505756 | -5.130547 | 0.692203  |
| 9 | -4.369469 | -4.472253 | -1.170304 |

Mol-2f/D\_s0\_ch1.out

\* SCF ENERGY / A.U. = -1381.18061748

|   |           |           |           |
|---|-----------|-----------|-----------|
| 6 | 1.254711  | 1.387549  | 1.378345  |
| 6 | 0.325592  | 2.368607  | 0.981280  |
| 6 | -0.831382 | 1.679348  | 0.737422  |
| 6 | 0.088684  | 3.795188  | 0.642494  |
| 6 | -1.891182 | 2.612884  | 0.236801  |
| 6 | -1.476588 | -0.748013 | 0.891706  |
| 6 | -2.848736 | -0.551902 | 1.007478  |
| 6 | -0.930325 | -2.016855 | 0.691019  |
| 6 | -3.698300 | -1.650736 | 0.910042  |
| 1 | -3.257613 | 0.438916  | 1.168578  |
| 6 | -1.784185 | -3.106711 | 0.605180  |
| 1 | 0.142380  | -2.141360 | 0.602583  |
| 6 | -3.163687 | -2.919216 | 0.711393  |
| 1 | -4.769739 | -1.510345 | 0.997795  |
| 1 | -1.377474 | -4.101381 | 0.448758  |
| 7 | -1.254271 | 3.847074  | 0.220946  |
| 7 | -0.598093 | 0.370795  | 0.985850  |
| 7 | 0.675184  | 0.188764  | 1.375504  |
| 8 | 0.820188  | 4.753116  | 0.673607  |
| 8 | -3.036268 | 2.398263  | -0.087138 |
| 6 | 2.645709  | 1.621079  | 1.872837  |
| 8 | 2.908264  | 2.660605  | 2.431788  |
| 8 | 3.581041  | 0.687986  | 1.721696  |
| 6 | 3.435333  | -0.476412 | 0.873104  |
| 1 | 2.877573  | -0.203270 | -0.026048 |
| 1 | 2.878359  | -1.237734 | 1.423494  |
| 6 | 4.832674  | -0.940875 | 0.533032  |
| 1 | 5.389933  | -1.189474 | 1.439888  |
| 1 | 4.774057  | -1.835495 | -0.093373 |
| 1 | 5.376308  | -0.166144 | -0.013919 |
| 6 | -1.890936 | 5.082117  | -0.201554 |
| 1 | -1.847252 | 5.817750  | 0.604015  |
| 1 | -1.390184 | 5.479500  | -1.086954 |
| 1 | -2.930682 | 4.856882  | -0.438127 |
| 6 | -4.053451 | -4.124870 | 0.618260  |
| 9 | -3.804869 | -5.007352 | 1.607647  |
| 9 | -3.871245 | -4.796636 | -0.536764 |
| 9 | -5.357095 | -3.814584 | 0.689561  |

Mol-2g/A\_s0\_ch1.out

\* SCF ENERGY / A.U. = -1136.45579535

|   |           |           |           |
|---|-----------|-----------|-----------|
| 6 | 1.438877  | 1.681695  | 0.629067  |
| 6 | 0.393236  | 2.626057  | 0.646337  |
| 6 | -0.753497 | 1.879857  | 0.593109  |
| 6 | 0.004565  | 4.060629  | 0.651841  |
| 6 | -1.951996 | 2.778601  | 0.551407  |
| 6 | -1.211532 | -0.593695 | 0.469104  |
| 6 | -2.534931 | -0.536322 | 0.901202  |
| 6 | -0.653062 | -1.768911 | -0.035095 |
| 6 | -3.320366 | -1.678750 | 0.821172  |
| 1 | -2.952805 | 0.384056  | 1.292091  |
| 6 | -1.438576 | -2.910207 | -0.106075 |
| 1 | 0.378472  | -1.783570 | -0.365406 |
| 6 | -2.772154 | -2.863759 | 0.319241  |
| 1 | -4.352288 | -1.653633 | 1.153311  |
| 1 | -1.024253 | -3.833649 | -0.495597 |
| 7 | -1.402762 | 4.052812  | 0.589123  |
| 7 | -0.398501 | 0.573692  | 0.544966  |
| 7 | 0.938179  | 0.450267  | 0.569174  |
| 8 | 0.666451  | 5.067120  | 0.696275  |
| 8 | -3.131397 | 2.514756  | 0.499229  |
| 6 | 2.902519  | 1.934925  | 0.678685  |
| 8 | 3.361736  | 3.054193  | 0.714016  |
| 8 | 3.614303  | 0.815103  | 0.680295  |
| 6 | 5.050067  | 0.978181  | 0.731750  |
| 1 | 5.299787  | 1.546390  | 1.632046  |
| 1 | 5.361229  | 1.556594  | -0.142526 |
| 6 | 5.657756  | -0.404419 | 0.745540  |
| 1 | 5.383032  | -0.960527 | -0.154798 |
| 1 | 6.747351  | -0.319140 | 0.779932  |
| 1 | 5.327044  | -0.966485 | 1.622954  |
| 6 | -2.188100 | 5.274242  | 0.574319  |
| 1 | -1.966010 | 5.869973  | 1.461808  |
| 1 | -1.961991 | 5.856073  | -0.321739 |
| 1 | -3.241311 | 4.994219  | 0.573535  |
| 6 | -3.585203 | -4.048765 | 0.244452  |
| 7 | -4.237143 | -5.003431 | 0.182625  |

Mol-2g/B\_s0\_ch1.out

\* SCF ENERGY / A.U. = -1136.45665810

|   |           |           |           |
|---|-----------|-----------|-----------|
| 6 | 1.374723  | 1.597079  | 0.519941  |
| 6 | 0.350739  | 2.558404  | 0.633635  |
| 6 | -0.808579 | 1.830568  | 0.667645  |
| 6 | -0.007116 | 3.993084  | 0.789812  |
| 6 | -1.983985 | 2.738659  | 0.857813  |
| 6 | -1.318681 | -0.631046 | 0.592000  |
| 6 | -2.642100 | -0.517999 | 0.171025  |
| 6 | -0.784375 | -1.845120 | 1.023900  |
| 6 | -3.454726 | -1.644120 | 0.193124  |
| 1 | -3.037667 | 0.432341  | -0.168484 |
| 6 | -1.597030 | -2.969465 | 1.037723  |
| 1 | 0.249104  | -1.902613 | 1.343809  |
| 6 | -2.931768 | -2.867363 | 0.626319  |

|   |           |           |           |
|---|-----------|-----------|-----------|
| 1 | -4.487423 | -1.576690 | -0.130878 |
| 1 | -1.203231 | -3.922819 | 1.372481  |
| 7 | -1.409427 | 4.002272  | 0.919464  |
| 7 | -0.479850 | 0.520457  | 0.581148  |
| 7 | 0.851062  | 0.374654  | 0.489524  |
| 8 | 0.673921  | 4.988110  | 0.816380  |
| 8 | -3.164175 | 2.489006  | 0.944019  |
| 6 | 2.848901  | 1.771006  | 0.432528  |
| 8 | 3.640202  | 0.860084  | 0.353742  |
| 8 | 3.159530  | 3.061303  | 0.453500  |
| 6 | 4.563903  | 3.389462  | 0.370559  |
| 1 | 4.966529  | 2.949308  | -0.545993 |
| 1 | 5.073169  | 2.937787  | 1.226742  |
| 6 | 4.668626  | 4.895938  | 0.374071  |
| 1 | 4.242254  | 5.313110  | 1.290000  |
| 1 | 5.721306  | 5.185962  | 0.316473  |
| 1 | 4.141962  | 5.323774  | -0.482979 |
| 6 | -2.166493 | 5.229047  | 1.094302  |
| 1 | -1.847295 | 5.738063  | 2.005981  |
| 1 | -2.015420 | 5.887674  | 0.236686  |
| 1 | -3.220405 | 4.962795  | 1.172388  |
| 6 | -3.771142 | -4.036322 | 0.645557  |
| 7 | -4.443423 | -4.978627 | 0.662230  |

Mol-2g/C\_s0\_ch1.out

\* SCF ENERGY / A.U. = -1136.44399210

|   |           |           |           |
|---|-----------|-----------|-----------|
| 6 | 1.300277  | 1.401813  | -0.049512 |
| 6 | 0.348006  | 2.389881  | 0.270605  |
| 6 | -0.835779 | 1.713624  | 0.390597  |
| 6 | 0.077588  | 3.832898  | 0.499143  |
| 6 | -1.949874 | 2.675645  | 0.677421  |
| 6 | -1.485487 | -0.706818 | 0.123747  |
| 6 | -2.694368 | -0.628541 | 0.811928  |
| 6 | -1.114655 | -1.852336 | -0.581691 |
| 6 | -3.551485 | -1.721142 | 0.795840  |
| 1 | -2.968629 | 0.268759  | 1.354525  |
| 6 | -1.970822 | -2.943953 | -0.590248 |
| 1 | -0.172080 | -1.883011 | -1.114401 |
| 6 | -3.188576 | -2.877691 | 0.097668  |
| 1 | -4.494915 | -1.679980 | 1.328930  |
| 1 | -1.701840 | -3.843597 | -1.133121 |
| 7 | -1.311605 | 3.907454  | 0.720122  |
| 7 | -0.594824 | 0.404653  | 0.143038  |
| 7 | 0.708820  | 0.212177  | -0.120006 |
| 8 | 0.812518  | 4.788070  | 0.519216  |
| 8 | -3.132240 | 2.481208  | 0.841759  |
| 6 | 2.738561  | 1.624802  | -0.388791 |
| 8 | 3.076395  | 2.690319  | -0.849815 |
| 8 | 3.634558  | 0.658549  | -0.211428 |
| 6 | 3.389811  | -0.548854 | 0.551299  |
| 1 | 2.833268  | -1.249527 | -0.074005 |
| 1 | 2.792494  | -0.304642 | 1.433276  |
| 6 | 4.744258  | -1.097128 | 0.936272  |
| 1 | 5.290644  | -0.382839 | 1.557593  |
| 1 | 4.610668  | -2.023011 | 1.502896  |
| 1 | 5.339591  | -1.318235 | 0.046633  |

|   |           |           |          |
|---|-----------|-----------|----------|
| 6 | -1.991359 | 5.162394  | 0.988839 |
| 1 | -1.578163 | 5.626962  | 1.886340 |
| 1 | -1.875210 | 5.840182  | 0.140930 |
| 1 | -3.047964 | 4.943261  | 1.141560 |
| 6 | -4.070819 | -4.014576 | 0.093413 |
| 7 | -4.778657 | -4.930605 | 0.091210 |

**Mol-2g/D\_s0\_ch1.out**

\* SCF ENERGY / A.U. = -1136.44392749

|   |           |           |           |
|---|-----------|-----------|-----------|
| 6 | 1.250771  | 1.382330  | 1.378778  |
| 6 | 0.320894  | 2.362715  | 0.980433  |
| 6 | -0.836414 | 1.673764  | 0.739971  |
| 6 | 0.085078  | 3.788643  | 0.637313  |
| 6 | -1.895806 | 2.606971  | 0.236457  |
| 6 | -1.479161 | -0.753573 | 0.899397  |
| 6 | -2.854429 | -0.555256 | 1.002067  |
| 6 | -0.931225 | -2.023279 | 0.714555  |
| 6 | -3.702258 | -1.650943 | 0.906291  |
| 1 | -3.264182 | 0.436999  | 1.151548  |
| 6 | -1.780739 | -3.116513 | 0.627802  |
| 1 | 0.142214  | -2.148231 | 0.637493  |
| 6 | -3.165361 | -2.929248 | 0.720328  |
| 1 | -4.775496 | -1.516461 | 0.983826  |
| 1 | -1.376001 | -4.112122 | 0.482557  |
| 7 | -1.258053 | 3.840246  | 0.216348  |
| 7 | -0.602688 | 0.365069  | 0.991157  |
| 7 | 0.671893  | 0.183896  | 1.379252  |
| 8 | 0.817736  | 4.745583  | 0.664936  |
| 8 | -3.040974 | 2.391702  | -0.086749 |
| 6 | 2.641919  | 1.617897  | 1.872956  |
| 8 | 2.902009  | 2.657759  | 2.432199  |
| 8 | 3.578463  | 0.686460  | 1.721392  |
| 6 | 3.433852  | -0.478253 | 0.872902  |
| 1 | 2.876151  | -0.205479 | -0.026409 |
| 1 | 2.877412  | -1.239893 | 1.423432  |
| 6 | 4.831634  | -0.941714 | 0.533415  |
| 1 | 5.388645  | -1.189772 | 1.440558  |
| 1 | 4.773953  | -1.836453 | -0.092886 |
| 1 | 5.374910  | -0.166637 | -0.013372 |
| 6 | -1.893526 | 5.074354  | -0.211204 |
| 1 | -1.849609 | 5.812839  | 0.591706  |
| 1 | -1.391722 | 5.467745  | -1.097761 |
| 1 | -2.933298 | 4.849105  | -0.447568 |
| 6 | -4.043475 | -4.065384 | 0.623382  |
| 7 | -4.746650 | -4.981400 | 0.542343  |

**Mol-2k/A\_s0\_ch1.out**

\* SCF ENERGY / A.U. = -1021.94900327

|   |           |           |          |
|---|-----------|-----------|----------|
| 6 | 1.422955  | 1.490257  | 0.588364 |
| 6 | 0.399350  | 2.461004  | 0.588635 |
| 6 | -0.770229 | 1.748036  | 0.588827 |
| 6 | 0.061852  | 3.907009  | 0.588636 |
| 6 | -1.938350 | 2.693556  | 0.589008 |
| 6 | -1.282288 | -0.732231 | 0.588817 |

|   |           |           |           |
|---|-----------|-----------|-----------|
| 6 | -2.668919 | -0.590962 | 0.588987  |
| 6 | -0.677858 | -1.991629 | 0.588747  |
| 6 | -3.465244 | -1.729032 | 0.589087  |
| 1 | -3.129909 | 0.390222  | 0.589043  |
| 6 | -1.477288 | -3.124920 | 0.588845  |
| 6 | -2.871391 | -2.994890 | 0.589016  |
| 1 | -4.545567 | -1.633667 | 0.589219  |
| 1 | -1.023124 | -4.109774 | 0.588791  |
| 7 | -1.345665 | 3.946513  | 0.588892  |
| 7 | -0.451722 | 0.426579  | 0.588701  |
| 7 | 0.882801  | 0.274524  | 0.588424  |
| 8 | 0.758295  | 4.891035  | 0.588441  |
| 8 | -3.129840 | 2.480442  | 0.589202  |
| 6 | 2.903892  | 1.665703  | 0.588069  |
| 8 | 3.361206  | 2.791114  | 0.588288  |
| 6 | -2.090494 | 5.193300  | 0.588961  |
| 1 | -1.847040 | 5.774259  | 1.480809  |
| 1 | -1.847025 | 5.774339  | -0.302829 |
| 1 | -3.152190 | 4.947903  | 0.588941  |
| 1 | 0.400792  | -2.079372 | 0.588618  |
| 6 | -3.696837 | -4.173042 | 0.589117  |
| 7 | -4.358061 | -5.123400 | 0.589200  |
| 6 | 3.748354  | 0.424531  | 0.587486  |
| 1 | 3.521367  | -0.183372 | 1.468731  |
| 1 | 3.521083  | -0.182710 | -0.294146 |
| 1 | 4.801313  | 0.706199  | 0.587419  |

Mol-2k/B\_s0\_ch1.out

\* SCF ENERGY / A.U. = -1021.94843369

|   |           |           |           |
|---|-----------|-----------|-----------|
| 6 | 1.353769  | 1.524437  | 0.656445  |
| 6 | 0.321603  | 2.485389  | 0.606025  |
| 6 | -0.844361 | 1.765321  | 0.580619  |
| 6 | -0.026863 | 3.927966  | 0.570349  |
| 6 | -2.015816 | 2.703119  | 0.526722  |
| 6 | -1.334459 | -0.717236 | 0.598272  |
| 6 | -2.721908 | -0.586093 | 0.611373  |
| 6 | -0.719038 | -1.970738 | 0.572636  |
| 6 | -3.509421 | -1.730161 | 0.596129  |
| 1 | -3.190802 | 0.391163  | 0.630693  |
| 6 | -1.509939 | -3.110051 | 0.558867  |
| 6 | -2.905009 | -2.990842 | 0.570690  |
| 1 | -4.590462 | -1.643769 | 0.605365  |
| 1 | -1.047894 | -4.090974 | 0.538586  |
| 7 | -1.428350 | 3.962237  | 0.515588  |
| 7 | -0.512454 | 0.448763  | 0.612310  |
| 7 | 0.820257  | 0.305434  | 0.658074  |
| 8 | 0.671497  | 4.913716  | 0.583765  |
| 8 | -3.205663 | 2.487541  | 0.499120  |
| 6 | 2.841244  | 1.693730  | 0.698372  |
| 8 | 3.563126  | 0.718531  | 0.739277  |
| 6 | -2.179023 | 5.205488  | 0.484208  |
| 1 | -2.068008 | 5.739453  | 1.430658  |
| 1 | -1.816659 | 5.831575  | -0.332976 |
| 1 | -3.228073 | 4.959491  | 0.321775  |
| 1 | 0.360473  | -2.048593 | 0.563268  |
| 6 | -3.722170 | -4.174854 | 0.556373  |



|   |           |           |           |
|---|-----------|-----------|-----------|
| 7 | -4.378241 | -5.128695 | 0.544214  |
| 6 | 3.350481  | 3.104114  | 0.686647  |
| 1 | 4.440335  | 3.099822  | 0.703857  |
| 1 | 2.988745  | 3.627579  | -0.204416 |
| 1 | 2.962526  | 3.648588  | 1.554010  |

Mol-3b/A\_s0\_ch1.out

\* SCF ENERGY / A.U. = -1328.12946553

|   |           |           |           |
|---|-----------|-----------|-----------|
| 6 | 1.489336  | 1.661731  | 0.603651  |
| 6 | 0.439105  | 2.600354  | 0.574690  |
| 6 | -0.703672 | 1.849589  | 0.503779  |
| 6 | 0.059877  | 4.031724  | 0.642106  |
| 6 | -1.906809 | 2.739430  | 0.524366  |
| 6 | -1.140875 | -0.635671 | 0.425856  |
| 6 | -2.467981 | -0.547099 | 0.010324  |
| 6 | -0.563142 | -1.856390 | 0.779022  |
| 6 | -3.238758 | -1.701528 | -0.037922 |
| 1 | -2.903515 | 0.406368  | -0.264468 |
| 6 | -1.334262 | -3.007946 | 0.721734  |
| 6 | -2.672335 | -2.930224 | 0.316186  |
| 1 | -4.274454 | -1.649855 | -0.355298 |
| 1 | -0.904102 | -3.965068 | 0.995752  |
| 7 | -1.361851 | 4.024532  | 0.601926  |
| 7 | -0.341196 | 0.542922  | 0.487527  |
| 7 | 0.995379  | 0.428861  | 0.546163  |
| 8 | 0.731815  | 5.025394  | 0.722072  |
| 8 | -3.083764 | 2.473838  | 0.483514  |
| 6 | 2.950544  | 1.924270  | 0.677551  |
| 8 | 3.401725  | 3.046773  | 0.708069  |
| 8 | 3.667330  | 0.808400  | 0.705932  |
| 6 | 5.101558  | 0.978642  | 0.779194  |
| 1 | 5.334349  | 1.550003  | 1.682087  |
| 1 | 5.423244  | 1.556524  | -0.091533 |
| 6 | 5.715267  | -0.401125 | 0.805005  |
| 1 | 5.455573  | -0.960344 | -0.097846 |
| 1 | 6.803837  | -0.310799 | 0.854518  |
| 1 | 5.374942  | -0.962760 | 1.679012  |
| 1 | 0.471352  | -1.898733 | 1.095948  |
| 6 | -3.473404 | -4.124763 | 0.268652  |
| 7 | -4.116620 | -5.086549 | 0.230039  |
| 6 | -2.155944 | 5.209910  | 0.649391  |
| 6 | -1.957508 | 6.204472  | -0.306541 |
| 6 | -3.112114 | 5.354806  | 1.653223  |
| 6 | -2.728031 | 7.363701  | -0.250530 |
| 1 | -1.207735 | 6.068993  | -1.079500 |
| 6 | -3.888877 | 6.510485  | 1.689999  |
| 1 | -3.243721 | 4.569993  | 2.391339  |
| 6 | -3.695648 | 7.516045  | 0.742643  |
| 1 | -2.574906 | 8.144789  | -0.988355 |
| 1 | -4.640048 | 6.626934  | 2.464712  |
| 1 | -4.297803 | 8.418519  | 0.778480  |

Mol-3b/B\_s0\_ch1.out

\* SCF ENERGY / A.U. = -1328.13009743

|   |           |           |           |
|---|-----------|-----------|-----------|
| 6 | 1.386306  | 1.580347  | 0.645939  |
| 6 | 0.356751  | 2.540218  | 0.598537  |
| 6 | -0.803358 | 1.814217  | 0.531900  |
| 6 | 0.017109  | 3.982846  | 0.617440  |
| 6 | -1.980667 | 2.741081  | 0.495876  |
| 6 | -1.279968 | -0.673369 | 0.483310  |
| 6 | -2.665101 | -0.551615 | 0.389907  |
| 6 | -0.657566 | -1.922850 | 0.528952  |
| 6 | -3.443313 | -1.701341 | 0.344269  |
| 1 | -3.139788 | 0.422220  | 0.354982  |
| 6 | -1.439237 | -3.067509 | 0.482571  |
| 6 | -2.832032 | -2.958036 | 0.390188  |
| 1 | -4.522542 | -1.621842 | 0.272348  |
| 1 | -0.972255 | -4.045671 | 0.518034  |
| 7 | -1.401522 | 4.012297  | 0.545836  |
| 7 | -0.466465 | 0.497810  | 0.535357  |
| 7 | 0.866638  | 0.359812  | 0.603707  |
| 8 | 0.714512  | 4.960560  | 0.684500  |
| 8 | -3.165290 | 2.515286  | 0.435282  |
| 6 | 2.861915  | 1.749864  | 0.730596  |
| 8 | 3.649304  | 0.834004  | 0.785759  |
| 8 | 3.175751  | 3.038563  | 0.740376  |
| 6 | 4.580789  | 3.360858  | 0.839653  |
| 1 | 5.095463  | 2.920234  | -0.018978 |
| 1 | 4.973388  | 2.905044  | 1.752939  |
| 6 | 4.689922  | 4.866811  | 0.860419  |
| 1 | 4.154670  | 5.283204  | 1.717704  |
| 1 | 5.742834  | 5.152307  | 0.934310  |
| 1 | 4.275780  | 5.299217  | -0.054053 |
| 1 | 0.419986  | -1.994200 | 0.601029  |
| 6 | -3.639179 | -4.148136 | 0.345558  |
| 7 | -4.287116 | -5.106884 | 0.308898  |
| 6 | -2.164077 | 5.219472  | 0.556067  |
| 6 | -1.925506 | 6.187364  | -0.417795 |
| 6 | -3.127701 | 5.412483  | 1.544544  |
| 6 | -2.661901 | 7.369796  | -0.394452 |
| 1 | -1.171047 | 6.013754  | -1.178518 |
| 6 | -3.870072 | 6.590951  | 1.548601  |
| 1 | -3.290875 | 4.647410  | 2.296941  |
| 6 | -3.636045 | 7.570669  | 0.583598  |
| 1 | -2.477921 | 8.130881  | -1.145939 |
| 1 | -4.626361 | 6.744852  | 2.311642  |
| 1 | -4.211713 | 8.490859  | 0.594307  |

Mol-4b/A\_s0\_ch1.out

\* SCF ENERGY / A.U. = -1087.83166139

|   |           |           |           |
|---|-----------|-----------|-----------|
| 6 | 1.691066  | -0.619295 | -0.179297 |
| 6 | 1.508363  | 0.754837  | -0.465763 |
| 6 | 0.167889  | 0.907497  | -0.593649 |
| 6 | -1.802506 | -0.634242 | -0.408786 |
| 6 | -2.741375 | 0.391931  | -0.545745 |
| 6 | -2.201836 | -1.967224 | -0.286854 |

|   |           |           |           |
|---|-----------|-----------|-----------|
| 6 | -4.093382 | 0.082598  | -0.566621 |
| 1 | -2.419517 | 1.425096  | -0.629932 |
| 6 | -3.554708 | -2.273372 | -0.305165 |
| 6 | -4.502143 | -1.251328 | -0.446161 |
| 1 | -4.831970 | 0.870168  | -0.670701 |
| 1 | -3.879739 | -3.304198 | -0.212914 |
| 7 | -0.431597 | -0.300347 | -0.391764 |
| 7 | 0.506982  | -1.238005 | -0.142653 |
| 6 | 2.957291  | -1.346567 | 0.065661  |
| 8 | 4.033285  | -0.783737 | 0.076564  |
| 8 | 2.783959  | -2.650623 | 0.272706  |
| 6 | 3.974760  | -3.436073 | 0.497528  |
| 1 | 3.613248  | -4.326898 | 1.013059  |
| 1 | 4.643073  | -2.881246 | 1.159938  |
| 6 | 4.646431  | -3.787894 | -0.814286 |
| 1 | 4.993687  | -2.889395 | -1.330317 |
| 1 | 5.511585  | -4.428518 | -0.619299 |
| 1 | 3.955972  | -4.329966 | -1.466258 |
| 1 | -1.457176 | -2.746366 | -0.180831 |
| 6 | -5.903256 | -1.572716 | -0.466359 |
| 7 | -7.032335 | -1.830297 | -0.482886 |
| 6 | 0.194337  | 2.403095  | -0.863956 |
| 6 | -0.166401 | 3.415490  | 0.243331  |
| 6 | 1.775430  | 2.242389  | -0.706606 |
| 1 | -0.157929 | 2.705437  | -1.853390 |
| 6 | 1.081887  | 4.326505  | 0.176493  |
| 6 | -0.003059 | 2.771137  | 1.633013  |
| 1 | -1.128452 | 3.910025  | 0.089566  |
| 6 | 2.092139  | 3.193054  | 0.468506  |
| 1 | 2.358021  | 2.475576  | -1.600745 |
| 1 | 1.080670  | 5.111015  | 0.940698  |
| 1 | 1.224317  | 4.785178  | -0.808395 |
| 1 | -0.416640 | 3.431239  | 2.401021  |
| 1 | -0.525401 | 1.811403  | 1.709543  |
| 6 | 1.540087  | 2.627190  | 1.789107  |
| 1 | 3.142374  | 3.487901  | 0.517789  |
| 1 | 1.905128  | 3.224567  | 2.629698  |
| 1 | 1.852703  | 1.592847  | 1.957700  |

Mol-4b/B\_s0\_ch1.out

\* SCF ENERGY / A.U. = -1087.83145305

|   |           |           |           |
|---|-----------|-----------|-----------|
| 6 | 1.362408  | -0.972770 | 0.377345  |
| 6 | 1.373825  | 0.373018  | -0.061371 |
| 6 | 0.085118  | 0.645721  | -0.380447 |
| 6 | -2.056324 | -0.656492 | -0.306854 |
| 6 | -2.834309 | 0.426129  | -0.725686 |
| 6 | -2.630976 | -1.902039 | -0.044403 |
| 6 | -4.202605 | 0.263320  | -0.883257 |
| 1 | -2.373863 | 1.388838  | -0.924055 |
| 6 | -4.000030 | -2.061763 | -0.202465 |
| 6 | -4.787557 | -0.981434 | -0.620419 |
| 1 | -4.818311 | 1.095843  | -1.206150 |
| 1 | -4.462164 | -3.022469 | -0.001973 |
| 7 | -0.667453 | -0.466367 | -0.145101 |
| 7 | 0.119776  | -1.459855 | 0.316293  |
| 6 | 2.458734  | -1.842434 | 0.864678  |

|   |           |           |           |
|---|-----------|-----------|-----------|
| 8 | 2.335156  | -2.998879 | 1.202111  |
| 8 | 3.614497  | -1.168623 | 0.876447  |
| 6 | 4.777130  | -1.881201 | 1.349721  |
| 1 | 5.619263  | -1.336131 | 0.920967  |
| 1 | 4.757602  | -2.894578 | 0.942288  |
| 6 | 4.830382  | -1.885409 | 2.863813  |
| 1 | 3.977628  | -2.423918 | 3.284396  |
| 1 | 5.747553  | -2.382084 | 3.193994  |
| 1 | 4.833486  | -0.862737 | 3.251152  |
| 1 | -2.007976 | -2.726488 | 0.279959  |
| 6 | -6.206351 | -1.149520 | -0.779735 |
| 7 | -7.349671 | -1.283256 | -0.907730 |
| 6 | 0.318422  | 2.088921  | -0.796979 |
| 6 | -0.048052 | 3.257492  | 0.141437  |
| 6 | 1.840508  | 1.785890  | -0.419190 |
| 1 | 0.124628  | 2.308824  | -1.849873 |
| 6 | 1.296610  | 4.021689  | 0.137793  |
| 6 | -0.122281 | 2.772269  | 1.601290  |
| 1 | -0.921815 | 3.825848  | -0.185447 |
| 6 | 2.127696  | 2.834730  | 0.677111  |
| 1 | 2.546182  | 1.848125  | -1.250882 |
| 1 | 1.298475  | 4.888316  | 0.807262  |
| 1 | 1.604289  | 4.341569  | -0.864027 |
| 1 | -0.543756 | 3.558971  | 2.233916  |
| 1 | -0.756079 | 1.886350  | 1.712590  |
| 6 | 1.365292  | 2.492769  | 1.969681  |
| 1 | 3.192369  | 3.025853  | 0.827274  |
| 1 | 1.696841  | 3.148203  | 2.780577  |
| 1 | 1.533682  | 1.459907  | 2.287777  |

## Excited states (S<sub>1</sub>)

## Optimised Geometries (S<sub>1</sub>)

Mol-2a/C\_slr\_ch1.out

\* SCF ENERGY / A.U. = -1159.03281272

|   |           |           |           |
|---|-----------|-----------|-----------|
| 6 | 1.411677  | 1.676564  | 0.563903  |
| 6 | 0.339464  | 2.613725  | 0.574422  |
| 6 | -0.819276 | 1.850522  | 0.585698  |
| 6 | -0.041832 | 4.030370  | 0.577608  |
| 6 | -1.984115 | 2.686243  | 0.598236  |
| 6 | -1.145840 | -0.618335 | 0.601231  |
| 6 | -2.569482 | -0.555555 | 0.619288  |
| 6 | -0.488828 | -1.885566 | 0.602288  |
| 6 | -3.290344 | -1.711987 | 0.639820  |
| 1 | -3.064749 | 0.411402  | 0.617645  |
| 6 | -1.225070 | -3.037056 | 0.623188  |
| 1 | 0.591089  | -1.912018 | 0.586756  |
| 6 | -2.638519 | -2.969492 | 0.643514  |
| 1 | -4.372546 | -1.695293 | 0.654848  |
| 1 | -0.716028 | -3.990941 | 0.624171  |
| 7 | -1.432399 | 3.994218  | 0.599278  |
| 7 | -0.412501 | 0.520642  | 0.583897  |
| 7 | 0.977611  | 0.436942  | 0.569192  |
| 8 | 0.622424  | 5.056029  | 0.565187  |
| 8 | -3.197012 | 2.456181  | 0.608552  |
| 8 | -3.432928 | -4.024073 | 0.666970  |
| 6 | 2.887469  | 1.903114  | 0.549340  |
| 8 | 3.704801  | 1.017644  | 0.534554  |
| 8 | 3.159657  | 3.196662  | 0.555522  |
| 6 | 4.552551  | 3.574338  | 0.543043  |
| 1 | 5.016346  | 3.149111  | -0.349757 |
| 1 | 5.034905  | 3.138852  | 1.420958  |
| 6 | 4.615355  | 5.082640  | 0.551072  |
| 1 | 4.137073  | 5.487836  | 1.444570  |
| 1 | 5.661035  | 5.398594  | 0.542924  |
| 1 | 4.120236  | 5.497938  | -0.328481 |
| 6 | -2.877647 | -5.341696 | 0.679162  |
| 1 | -3.730322 | -6.014264 | 0.701435  |
| 1 | -2.289664 | -5.516507 | -0.224216 |
| 1 | -2.264342 | -5.488780 | 1.570650  |
| 6 | -2.243869 | 5.190262  | 0.599172  |
| 1 | -1.848175 | 5.901908  | 1.324551  |
| 1 | -2.252879 | 5.659760  | -0.387770 |
| 1 | -3.259825 | 4.909878  | 0.872503  |

Mol-2a/D\_slr\_ch1.out

\* SCF ENERGY / A.U. = -1159.03286243

|   |           |          |          |
|---|-----------|----------|----------|
| 6 | 1.403853  | 1.695963 | 0.568801 |
| 6 | 0.340862  | 2.644601 | 0.578014 |
| 6 | -0.824805 | 1.893540 | 0.592729 |

|   |           |           |           |
|---|-----------|-----------|-----------|
| 6 | -0.026088 | 4.064555  | 0.577451  |
| 6 | -1.981899 | 2.741328  | 0.604623  |
| 6 | -1.177764 | -0.571107 | 0.609345  |
| 6 | -2.599160 | -0.484968 | 0.626656  |
| 6 | -0.540742 | -1.849908 | 0.609028  |
| 6 | -3.354424 | -1.627784 | 0.643200  |
| 1 | -3.076364 | 0.491384  | 0.626937  |
| 6 | -1.303640 | -2.975613 | 0.625610  |
| 1 | 0.538319  | -1.898014 | 0.595550  |
| 6 | -2.721482 | -2.888829 | 0.643082  |
| 1 | -4.432564 | -1.547783 | 0.656252  |
| 1 | -0.851386 | -3.959149 | 0.625954  |
| 7 | -1.417194 | 4.042849  | 0.600763  |
| 7 | -0.430099 | 0.558441  | 0.593182  |
| 7 | 0.956923  | 0.461196  | 0.577480  |
| 8 | 0.648264  | 5.083736  | 0.561214  |
| 8 | -3.197913 | 2.523904  | 0.617811  |
| 8 | -3.357923 | -4.045398 | 0.658616  |
| 6 | 2.882167  | 1.905454  | 0.552653  |
| 8 | 3.689012  | 1.010499  | 0.540567  |
| 8 | 3.169925  | 3.195732  | 0.554203  |
| 6 | 4.567719  | 3.555172  | 0.540031  |
| 1 | 5.025762  | 3.120237  | -0.351055 |
| 1 | 5.044461  | 3.116751  | 1.419547  |
| 6 | 4.650567  | 5.062505  | 0.542074  |
| 1 | 4.177910  | 5.477624  | 1.434023  |
| 1 | 5.700374  | 5.364419  | 0.532521  |
| 1 | 4.160879  | 5.480914  | -0.339064 |
| 6 | -4.787378 | -4.075746 | 0.677292  |
| 1 | -5.054102 | -5.128675 | 0.688172  |
| 1 | -5.167001 | -3.585801 | 1.576141  |
| 1 | -5.190270 | -3.598391 | -0.218205 |
| 6 | -2.215866 | 5.247590  | 0.598677  |
| 1 | -1.820938 | 5.951847  | 1.331736  |
| 1 | -2.209797 | 5.721917  | -0.385913 |
| 1 | -3.237344 | 4.976168  | 0.860159  |

Mol-2e/A\_slr\_ch1.out

\* SCF ENERGY / A.U. = -1504.11126605

|   |           |           |          |
|---|-----------|-----------|----------|
| 6 | 1.431101  | 1.698815  | 0.592066 |
| 6 | 0.375942  | 2.657016  | 0.607748 |
| 6 | -0.819637 | 1.853749  | 0.613075 |
| 6 | 0.059133  | 4.038329  | 0.604407 |
| 6 | -1.981213 | 2.656329  | 0.612912 |
| 6 | -1.168353 | -0.644235 | 0.609464 |
| 6 | -2.558672 | -0.596179 | 0.660631 |
| 6 | -0.498448 | -1.866128 | 0.563139 |
| 6 | -3.282063 | -1.779452 | 0.664317 |
| 1 | -3.082937 | 0.352107  | 0.694115 |
| 6 | -1.226187 | -3.045172 | 0.567930 |
| 1 | 0.581217  | -1.892513 | 0.524000 |
| 6 | -2.612528 | -2.993980 | 0.618473 |
| 1 | -4.363370 | -1.750816 | 0.703606 |
| 1 | -0.713606 | -3.997891 | 0.532026 |
| 7 | -1.389516 | 3.990238  | 0.617374 |
| 7 | -0.417988 | 0.557151  | 0.603901 |

|    |           |           |           |
|----|-----------|-----------|-----------|
| 7  | 0.946790  | 0.482689  | 0.592951  |
| 8  | 0.674857  | 5.093830  | 0.586484  |
| 8  | -3.194863 | 2.488414  | 0.609155  |
| 6  | 2.895908  | 1.958640  | 0.583733  |
| 8  | 3.348454  | 3.074851  | 0.594693  |
| 8  | 3.602836  | 0.841075  | 0.563897  |
| 6  | 5.041395  | 0.985812  | 0.556515  |
| 1  | 5.335789  | 1.544981  | 1.446886  |
| 1  | 5.324588  | 1.566049  | -0.323960 |
| 6  | 5.635566  | -0.401672 | 0.536374  |
| 1  | 5.323967  | -0.947348 | -0.356376 |
| 1  | 6.725095  | -0.325754 | 0.530773  |
| 1  | 5.334506  | -0.968447 | 1.419547  |
| 6  | -2.191302 | 5.162001  | 0.576172  |
| 1  | -1.622384 | 5.994453  | 0.988749  |
| 1  | -2.434651 | 5.394844  | -0.471608 |
| 1  | -3.128784 | 4.975636  | 1.101115  |
| 17 | -3.528093 | -4.482216 | 0.624823  |

Mol-2e/B\_slr\_ch1.out

\* SCF ENERGY / A.U. = -1504.11223076

|    |           |           |           |
|----|-----------|-----------|-----------|
| 6  | 1.405325  | 1.727454  | 0.574612  |
| 6  | 0.343628  | 2.679576  | 0.593631  |
| 6  | -0.847063 | 1.867692  | 0.606477  |
| 6  | 0.014427  | 4.058756  | 0.589113  |
| 6  | -2.014440 | 2.662273  | 0.610784  |
| 6  | -1.178982 | -0.632192 | 0.609498  |
| 6  | -2.569366 | -0.593074 | 0.666154  |
| 6  | -0.500804 | -1.849496 | 0.563482  |
| 6  | -3.284760 | -1.781081 | 0.675789  |
| 1  | -3.099817 | 0.351750  | 0.699522  |
| 6  | -1.220687 | -3.033328 | 0.574227  |
| 1  | 0.578851  | -1.868706 | 0.520094  |
| 6  | -2.607130 | -2.991194 | 0.630214  |
| 1  | -4.366069 | -1.759636 | 0.719412  |
| 1  | -0.701751 | -3.982585 | 0.538650  |
| 7  | -1.432598 | 3.999226  | 0.609786  |
| 7  | -0.436701 | 0.574460  | 0.597716  |
| 7  | 0.927914  | 0.509030  | 0.580269  |
| 8  | 0.620928  | 5.120349  | 0.565837  |
| 8  | -3.227044 | 2.485382  | 0.613168  |
| 6  | 2.882791  | 1.922149  | 0.557008  |
| 8  | 3.680495  | 1.021031  | 0.531638  |
| 8  | 3.172322  | 3.211622  | 0.573603  |
| 6  | 4.571838  | 3.572003  | 0.559269  |
| 1  | 5.025685  | 3.147214  | -0.338517 |
| 1  | 5.049873  | 3.123268  | 1.432532  |
| 6  | 4.652485  | 5.079057  | 0.578404  |
| 1  | 4.182092  | 5.483419  | 1.476475  |
| 1  | 5.701893  | 5.381977  | 0.569850  |
| 1  | 4.160749  | 5.507036  | -0.296958 |
| 6  | -2.243756 | 5.165160  | 0.571786  |
| 1  | -1.678420 | 6.002619  | 0.978949  |
| 1  | -2.496781 | 5.393819  | -0.474476 |
| 1  | -3.175749 | 4.972669  | 1.104205  |
| 17 | -3.512862 | -4.485320 | 0.643811  |

Mol-2f/A\_slr\_ch1.out

\* SCF ENERGY / A.U. = -1381.56239266

|   |           |           |           |
|---|-----------|-----------|-----------|
| 6 | 1.426465  | 1.699327  | 0.592051  |
| 6 | 0.375049  | 2.660128  | 0.617611  |
| 6 | -0.822784 | 1.861643  | 0.632770  |
| 6 | 0.065671  | 4.041910  | 0.618875  |
| 6 | -1.982807 | 2.664729  | 0.645758  |
| 6 | -1.177470 | -0.636605 | 0.630111  |
| 6 | -2.567649 | -0.581773 | 0.669469  |
| 6 | -0.508587 | -1.860384 | 0.603721  |
| 6 | -3.290592 | -1.764494 | 0.681665  |
| 1 | -3.087812 | 0.368710  | 0.690919  |
| 6 | -1.242881 | -3.033133 | 0.617213  |
| 1 | 0.571114  | -1.887879 | 0.575382  |
| 6 | -2.633122 | -2.988539 | 0.659697  |
| 1 | -4.371861 | -1.723824 | 0.715301  |
| 1 | -0.725191 | -3.984201 | 0.600304  |
| 7 | -1.386774 | 3.999723  | 0.645645  |
| 7 | -0.423542 | 0.561040  | 0.619059  |
| 7 | 0.939221  | 0.484203  | 0.596235  |
| 8 | 0.681594  | 5.095735  | 0.596013  |
| 8 | -3.196158 | 2.502792  | 0.654289  |
| 6 | 2.892176  | 1.955601  | 0.572619  |
| 8 | 3.347102  | 3.070688  | 0.590059  |
| 8 | 3.595549  | 0.836592  | 0.535816  |
| 6 | 5.034623  | 0.977071  | 0.517105  |
| 1 | 5.338458  | 1.525975  | 1.410671  |
| 1 | 5.311564  | 1.565693  | -0.359764 |
| 6 | 5.624191  | -0.411918 | 0.477146  |
| 1 | 5.303128  | -0.947212 | -0.418521 |
| 1 | 6.713848  | -0.339211 | 0.462732  |
| 1 | 5.329166  | -0.987048 | 1.356942  |
| 6 | -2.184621 | 5.172455  | 0.611201  |
| 1 | -1.605763 | 6.006743  | 1.005654  |
| 1 | -2.447029 | 5.396405  | -0.434479 |
| 1 | -3.114273 | 4.992509  | 1.152514  |
| 6 | -3.418233 | -4.267095 | 0.621949  |
| 9 | -2.798567 | -5.263153 | 1.279185  |
| 9 | -4.639393 | -4.134974 | 1.164898  |
| 9 | -3.604554 | -4.703026 | -0.642627 |

Mol-2f/B\_slr\_ch1.out

\* SCF ENERGY / A.U. = -1381.56334002

|   |           |           |          |
|---|-----------|-----------|----------|
| 6 | 1.396917  | 1.728064  | 0.555545 |
| 6 | 0.339628  | 2.682972  | 0.597155 |
| 6 | -0.853434 | 1.876069  | 0.624178 |
| 6 | 0.018335  | 4.062691  | 0.607135 |
| 6 | -2.018815 | 2.671300  | 0.654580 |
| 6 | -1.192285 | -0.624086 | 0.617571 |
| 6 | -2.582131 | -0.577770 | 0.674439 |
| 6 | -0.515925 | -1.843281 | 0.579089 |



|   |           |           |           |
|---|-----------|-----------|-----------|
| 6 | -3.297496 | -1.764934 | 0.692235  |
| 1 | -3.107875 | 0.369360  | 0.705205  |
| 6 | -1.242824 | -3.020670 | 0.598337  |
| 1 | 0.563495  | -1.863902 | 0.537098  |
| 6 | -2.632635 | -2.984756 | 0.658371  |
| 1 | -4.378489 | -1.731143 | 0.739568  |
| 1 | -0.719384 | -3.968345 | 0.572012  |
| 7 | -1.432309 | 4.009217  | 0.651858  |
| 7 | -0.445971 | 0.578755  | 0.600776  |
| 7 | 0.916102  | 0.510712  | 0.561434  |
| 8 | 0.624983  | 5.122649  | 0.580385  |
| 8 | -3.231030 | 2.500733  | 0.677334  |
| 6 | 2.874912  | 1.918158  | 0.516853  |
| 8 | 3.668415  | 1.014525  | 0.467764  |
| 8 | 3.169213  | 3.206226  | 0.545319  |
| 6 | 4.569925  | 3.561726  | 0.513561  |
| 1 | 5.007455  | 3.148040  | -0.397392 |
| 1 | 5.060021  | 3.098703  | 1.372532  |
| 6 | 4.656861  | 5.068002  | 0.552770  |
| 1 | 4.201928  | 5.461394  | 1.463600  |
| 1 | 5.707245  | 5.366919  | 0.532465  |
| 1 | 4.153739  | 5.510308  | -0.308880 |
| 6 | -2.239418 | 5.176421  | 0.632604  |
| 1 | -1.660593 | 6.014012  | 1.019809  |
| 1 | -2.520912 | 5.400201  | -0.407993 |
| 1 | -3.158637 | 4.988361  | 1.188798  |
| 6 | -3.410903 | -4.267703 | 0.626231  |
| 9 | -2.775471 | -5.263680 | 1.267938  |
| 9 | -4.624089 | -4.145287 | 1.189405  |
| 9 | -3.615315 | -4.697584 | -0.637593 |

Mol-2g/A\_slr\_ch1.out

\* SCF ENERGY / A.U. = -1136.73527164

|   |           |           |          |
|---|-----------|-----------|----------|
| 6 | 1.424170  | 1.691651  | 0.592701 |
| 6 | 0.370692  | 2.651100  | 0.609163 |
| 6 | -0.825411 | 1.851677  | 0.616831 |
| 6 | 0.059984  | 4.032818  | 0.605652 |
| 6 | -1.986718 | 2.652871  | 0.618693 |
| 6 | -1.174568 | -0.645830 | 0.613621 |
| 6 | -2.566491 | -0.592750 | 0.656926 |
| 6 | -0.502171 | -1.868529 | 0.575256 |
| 6 | -3.288397 | -1.773318 | 0.661013 |
| 1 | -3.087295 | 0.357334  | 0.684624 |
| 6 | -1.230588 | -3.043213 | 0.580200 |
| 1 | 0.577432  | -1.892222 | 0.542174 |
| 6 | -2.626494 | -3.002158 | 0.623106 |
| 1 | -4.370078 | -1.740222 | 0.694338 |
| 1 | -0.715744 | -3.995275 | 0.550315 |
| 7 | -1.392996 | 3.989260  | 0.620629 |
| 7 | -0.424438 | 0.550878  | 0.607721 |
| 7 | 0.940183  | 0.476036  | 0.595046 |
| 8 | 0.674659  | 5.086781  | 0.586068 |
| 8 | -3.199264 | 2.488342  | 0.617937 |
| 6 | 2.890055  | 1.951488  | 0.582451 |
| 8 | 3.341222  | 3.067997  | 0.591869 |
| 8 | 3.595885  | 0.834039  | 0.562966 |

|   |           |           |           |
|---|-----------|-----------|-----------|
| 6 | 5.035072  | 0.977486  | 0.553968  |
| 1 | 5.330354  | 1.537550  | 1.443431  |
| 1 | 5.317399  | 1.556450  | -0.327572 |
| 6 | 5.627833  | -0.410530 | 0.534957  |
| 1 | 5.314996  | -0.957036 | -0.356833 |
| 1 | 6.717388  | -0.335457 | 0.528154  |
| 1 | 5.327334  | -0.975914 | 1.419194  |
| 6 | -2.191788 | 5.160780  | 0.575629  |
| 1 | -1.620284 | 5.995525  | 0.979925  |
| 1 | -2.437408 | 5.386387  | -0.473889 |
| 1 | -3.129560 | 4.978825  | 1.101899  |
| 6 | -3.378357 | -4.220939 | 0.628695  |
| 7 | -3.982476 | -5.202050 | 0.633192  |

**Mol-2g/B\_slr\_ch1.out**

\* SCF ENERGY / A.U. = -1136.73624420

|   |           |           |           |
|---|-----------|-----------|-----------|
| 6 | 1.397328  | 1.720494  | 0.572414  |
| 6 | 0.337682  | 2.674179  | 0.593679  |
| 6 | -0.853858 | 1.866466  | 0.608816  |
| 6 | 0.015017  | 4.053820  | 0.590162  |
| 6 | -2.020735 | 2.659895  | 0.616310  |
| 6 | -1.187118 | -0.632969 | 0.611083  |
| 6 | -2.579091 | -0.588241 | 0.659696  |
| 6 | -0.506898 | -1.851220 | 0.573517  |
| 6 | -3.293543 | -1.773250 | 0.670311  |
| 1 | -3.105737 | 0.358618  | 0.686870  |
| 6 | -1.228002 | -3.030462 | 0.584946  |
| 1 | 0.572704  | -1.868192 | 0.536205  |
| 6 | -2.623933 | -2.997958 | 0.633386  |
| 1 | -4.375269 | -1.746888 | 0.707931  |
| 1 | -0.707139 | -3.979241 | 0.555843  |
| 7 | -1.436487 | 3.999183  | 0.613500  |
| 7 | -0.444492 | 0.568901  | 0.598837  |
| 7 | 0.919681  | 0.502716  | 0.578776  |
| 8 | 0.620694  | 5.113737  | 0.565685  |
| 8 | -3.232314 | 2.486822  | 0.622077  |
| 6 | 2.876021  | 1.913753  | 0.552428  |
| 8 | 3.671293  | 1.011061  | 0.523010  |
| 8 | 3.166613  | 3.202445  | 0.572207  |
| 6 | 4.567022  | 3.561406  | 0.556479  |
| 1 | 5.018219  | 3.138984  | -0.343699 |
| 1 | 5.045740  | 3.108757  | 1.427282  |
| 6 | 4.649628  | 5.068178  | 0.580776  |
| 1 | 4.181537  | 5.470078  | 1.481141  |
| 1 | 5.699483  | 5.369451  | 0.571538  |
| 1 | 4.157260  | 5.499992  | -0.292324 |
| 6 | -2.244410 | 5.165060  | 0.572782  |
| 1 | -1.675786 | 6.004715  | 0.970710  |
| 1 | -2.501284 | 5.386291  | -0.474830 |
| 1 | -3.176014 | 4.977219  | 1.107870  |
| 6 | -3.368490 | -4.221216 | 0.645762  |
| 7 | -3.967217 | -5.205579 | 0.655777  |

Mol-2k/A\_slr\_ch1.out

```
* SCF ENERGY / A.U. = -1097.41789337

 6      1.421860      1.683097      0.593280
 6      0.370749      2.644748      0.610295
 6     -0.826939      1.847943      0.617712
 6      0.063461      4.027053      0.606828
 6     -1.986599      2.651461      0.619491
 6     -1.181794     -0.649039      0.613838
 6     -2.573494     -0.592311      0.657283
 6     -0.512551     -1.873363      0.575228
 6     -3.298480     -1.771023      0.661367
 1     -3.091961      0.359027      0.685119
 6     -1.243986     -3.046187      0.580166
 1      0.566968     -1.899985      0.541964
 6     -2.639757     -3.001517      0.623275
 1     -4.380065     -1.735112      0.694816
 1     -0.731591     -3.999558      0.550117
 7     -1.389910      3.986863      0.621586
 7     -0.428554      0.546041      0.608065
 7      0.935273      0.468306      0.595092
 8      0.680549      5.079492      0.587219
 8     -3.199401      2.489818      0.618529
 6      2.887086      1.940390      0.583379
 8      3.343567      3.054013      0.597017
 8      3.592422      0.820647      0.558863
 6      5.019772      0.973362      0.549778
 1      5.348251      1.494491      1.449287
 1      5.333261      1.529449     -0.333982
 6     -2.185992      5.160006      0.575764
 1     -1.612972      5.993693      0.980126
 1     -2.430225      5.385805     -0.474102
 1     -3.124696      4.980201      1.101127
 6     -3.394839     -4.218335      0.628859
 7     -4.001642     -5.197775      0.633359
 1      5.417084     -0.037689      0.526711
```

Mol-2k/B\_slr\_ch1.out

```
* SCF ENERGY / A.U. = -1097.41879232

 6      1.407359      1.709474      0.579763
 6      0.351139      2.666631      0.600315
 6     -0.843018      1.863063      0.612544
 6      0.033660      4.047207      0.597143
 6     -2.007237      2.660399      0.618352
 6     -1.185030     -0.635438      0.611418
 6     -2.576802     -0.585341      0.658033
 6     -0.509359     -1.856112      0.573353
 6     -3.295852     -1.767609      0.666126
 1     -3.099966      0.363420      0.685542
 6     -1.235014     -3.032602      0.582267
 1      0.570230     -1.877263      0.537577
 6     -2.630868     -2.994770      0.628686
 1     -4.377520     -1.737121      0.702154
 1     -0.717788     -3.983352      0.552762
 7     -1.418241      3.997970      0.617542
```

|   |           |           |           |
|---|-----------|-----------|-----------|
| 7 | -0.437809 | 0.563916  | 0.601735  |
| 7 | 0.925527  | 0.493127  | 0.583809  |
| 8 | 0.643453  | 5.104829  | 0.574458  |
| 8 | -3.219304 | 2.491790  | 0.621718  |
| 6 | 2.885814  | 1.896858  | 0.562286  |
| 8 | 3.680584  | 0.994797  | 0.528365  |
| 8 | 3.181392  | 3.186119  | 0.589905  |
| 6 | 4.574847  | 3.527654  | 0.576535  |
| 1 | 5.043464  | 3.153858  | -0.334201 |
| 1 | 5.072883  | 3.104414  | 1.449208  |
| 6 | -2.221898 | 5.166557  | 0.575305  |
| 1 | -1.651470 | 6.004182  | 0.974932  |
| 1 | -2.475150 | 5.389014  | -0.473002 |
| 1 | -3.155668 | 4.981670  | 1.107642  |
| 6 | -3.380243 | -4.215141 | 0.638402  |
| 7 | -3.983006 | -5.197041 | 0.646267  |
| 1 | 4.604771  | 4.613177  | 0.605963  |

Mol-3b/A\_slr\_ch1.out

\* SCF ENERGY / A.U. = -1328.43995055

|   |           |           |           |
|---|-----------|-----------|-----------|
| 6 | 1.413190  | 1.709702  | 0.601148  |
| 6 | 0.357549  | 2.664939  | 0.584518  |
| 6 | -0.821630 | 1.883235  | 0.563508  |
| 6 | 0.062740  | 4.046278  | 0.584648  |
| 6 | -1.987899 | 2.670158  | 0.552326  |
| 6 | -1.174585 | -0.627526 | 0.535753  |
| 6 | -2.563079 | -0.580590 | 0.428555  |
| 6 | -0.507410 | -1.851336 | 0.624676  |
| 6 | -3.284516 | -1.762062 | 0.413669  |
| 1 | -3.080556 | 0.368752  | 0.360151  |
| 6 | -1.233526 | -3.026811 | 0.606966  |
| 1 | 0.569669  | -1.872788 | 0.706289  |
| 6 | -2.626765 | -2.989899 | 0.501949  |
| 1 | -4.363757 | -1.729666 | 0.330982  |
| 1 | -0.719580 | -3.977455 | 0.676304  |
| 7 | -1.417735 | 4.041396  | 0.573556  |
| 7 | -0.422068 | 0.566811  | 0.554270  |
| 7 | 0.930148  | 0.490612  | 0.581582  |
| 8 | 0.720581  | 5.071072  | 0.639824  |
| 8 | -3.193563 | 2.457095  | 0.471130  |
| 6 | 2.876862  | 1.961295  | 0.622097  |
| 8 | 3.344761  | 3.072381  | 0.621984  |
| 8 | 3.580869  | 0.838360  | 0.638760  |
| 6 | 5.017747  | 0.977098  | 0.655385  |
| 1 | 5.300627  | 1.547756  | 1.542429  |
| 1 | 5.321585  | 1.542924  | -0.227804 |
| 6 | 5.606793  | -0.413130 | 0.665910  |
| 1 | 5.307657  | -0.970603 | -0.223898 |
| 1 | 6.696709  | -0.342625 | 0.678071  |
| 1 | 5.287640  | -0.965919 | 1.551673  |
| 6 | -3.377034 | -4.208971 | 0.484141  |
| 7 | -3.980464 | -5.190763 | 0.469938  |
| 6 | -2.183448 | 5.164950  | 0.601277  |
| 6 | -3.487349 | 5.135416  | 1.176310  |
| 6 | -1.687130 | 6.385077  | 0.056824  |
| 6 | -4.245818 | 6.282417  | 1.201098  |

|   |           |          |           |
|---|-----------|----------|-----------|
| 1 | -3.853418 | 4.221775 | 1.614997  |
| 6 | -2.478708 | 7.508553 | 0.077410  |
| 1 | -0.708116 | 6.405250 | -0.393527 |
| 6 | -3.753108 | 7.466659 | 0.649683  |
| 1 | -5.227073 | 6.264208 | 1.657718  |
| 1 | -2.110655 | 8.428766 | -0.357743 |
| 1 | -4.362967 | 8.361902 | 0.667865  |

Mol-3b/B\_slr\_chl.out

\* SCF ENERGY / A.U. = -1328.44084701

|   |           |           |           |
|---|-----------|-----------|-----------|
| 6 | 1.389230  | 1.737966  | 0.634187  |
| 6 | 0.329238  | 2.689707  | 0.601875  |
| 6 | -0.846593 | 1.901789  | 0.575430  |
| 6 | 0.025019  | 4.069602  | 0.594692  |
| 6 | -2.017132 | 2.682258  | 0.553112  |
| 6 | -1.188494 | -0.610478 | 0.558252  |
| 6 | -2.575630 | -0.569996 | 0.433740  |
| 6 | -0.517106 | -1.830491 | 0.663867  |
| 6 | -3.291933 | -1.754572 | 0.417903  |
| 1 | -3.096352 | 0.376529  | 0.352960  |
| 6 | -1.238098 | -3.009183 | 0.645048  |
| 1 | 0.558970  | -1.846806 | 0.758726  |
| 6 | -2.630072 | -2.978860 | 0.522735  |
| 1 | -4.370206 | -1.727366 | 0.321783  |
| 1 | -0.720931 | -3.957031 | 0.727149  |
| 7 | -1.454550 | 4.055804  | 0.571402  |
| 7 | -0.441061 | 0.587632  | 0.577826  |
| 7 | 0.910161  | 0.517650  | 0.618073  |
| 8 | 0.674333  | 5.100490  | 0.652525  |
| 8 | -3.221213 | 2.462658  | 0.465513  |
| 6 | 2.865237  | 1.920289  | 0.669891  |
| 8 | 3.658093  | 1.014143  | 0.719801  |
| 8 | 3.176271  | 3.206966  | 0.637163  |
| 6 | 4.579927  | 3.541292  | 0.666784  |
| 1 | 5.064828  | 3.069720  | -0.190722 |
| 1 | 5.014413  | 3.124886  | 1.578156  |
| 6 | 4.690496  | 5.046368  | 0.623286  |
| 1 | 4.194601  | 5.498794  | 1.483989  |
| 1 | 5.745233  | 5.329942  | 0.641800  |
| 1 | 4.240732  | 5.444148  | -0.288378 |
| 6 | -3.375341 | -4.201035 | 0.504101  |
| 7 | -3.975250 | -5.184963 | 0.489212  |
| 6 | -2.226838 | 5.175463  | 0.585788  |
| 6 | -1.734321 | 6.393958  | 0.034811  |
| 6 | -3.533979 | 5.142633  | 1.152651  |
| 6 | -2.532729 | 7.512799  | 0.041028  |
| 1 | -0.752751 | 6.416174  | -0.409760 |
| 6 | -4.299504 | 6.285314  | 1.163479  |
| 1 | -3.897436 | 4.230239  | 1.596126  |
| 6 | -3.810482 | 7.467926  | 0.605620  |
| 1 | -2.167628 | 8.431589  | -0.399625 |
| 1 | -5.283577 | 6.264734  | 1.613882  |
| 1 | -4.425859 | 8.359545  | 0.612460  |

Mol-4b/A\_slr\_ch1.out

```
* SCF ENERGY / A.U. = -1088.11830346

 6      1.671513    -0.631093    -0.273004
 6      1.472294     0.754482    -0.591554
 6      0.144966     0.925751    -0.736204
 6     -1.787602    -0.580075    -0.461139
 6     -2.758124     0.444914    -0.730658
 6     -2.213884    -1.921650    -0.158435
 6     -4.082685     0.138906    -0.702167
 1     -2.429635     1.452211    -0.954195
 6     -3.547304    -2.207166    -0.134044
 6     -4.508495    -1.193935    -0.402905
 1     -4.825109     0.900512    -0.903706
 1     -3.884191    -3.210851     0.092929
 7     -0.479760    -0.280296    -0.496089
 7      0.491375    -1.263393    -0.232024
 6      2.950135    -1.289309    -0.011921
 8      4.009476    -0.690098    -0.039261
 8      2.821757    -2.589022     0.264358
 6      4.030715    -3.329966     0.519654
 1      3.700433    -4.181739     1.113433
 1      4.704071    -2.714165     1.117743
 6      4.687897    -3.777950    -0.770577
 1      5.022786    -2.920482    -1.356719
 1      5.558705    -4.395921    -0.537680
 1      3.994965    -4.371819    -1.370562
 1     -1.464353    -2.673076     0.043923
 6     -5.884913    -1.500035    -0.373550
 7     -7.017794    -1.749480    -0.349904
 6      0.181647     2.434491    -0.901835
 6     -0.171606     3.371250     0.271498
 6      1.760210     2.242768    -0.741518
 1     -0.159848     2.814344    -1.866034
 6      1.086893     4.267195     0.278288
 6     -0.032875     2.634376     1.614853
 1     -1.123907     3.886612     0.144228
 6      2.076260     3.102905     0.500144
 1      2.364246     2.516221    -1.607417
 1      1.090156     4.995543     1.093382
 1      1.245639     4.792608    -0.667566
 1     -0.441863     3.249324     2.419468
 1     -0.572806     1.684387     1.626572
 6      1.504581     2.452636     1.772160
 1      3.128554     3.374209     0.576739
 1      1.873915     2.978517     2.655208
 1      1.798828     1.405228     1.868676
```

Mol-4b/B\_slr\_ch1.out

```
* SCF ENERGY / A.U. = -1088.11845650

 6      1.340642    -1.034626     0.300509
 6      1.362290     0.310486    -0.198999
 6      0.095912     0.612373    -0.538046
 6     -2.034016    -0.615926    -0.351354
 6     -2.822600     0.467706    -0.871397
```

|   |           |           |           |
|---|-----------|-----------|-----------|
| 6 | -2.665782 | -1.847295 | 0.047508  |
| 6 | -4.168939 | 0.320387  | -0.990023 |
| 1 | -2.340922 | 1.391595  | -1.166201 |
| 6 | -4.017615 | -1.973758 | -0.078663 |
| 6 | -4.798100 | -0.903431 | -0.597137 |
| 1 | -4.775631 | 1.127165  | -1.380921 |
| 1 | -4.507595 | -2.892704 | 0.217465  |
| 7 | -0.703902 | -0.476191 | -0.245808 |
| 7 | 0.092043  | -1.518191 | 0.253784  |
| 6 | 2.437478  | -1.841086 | 0.833059  |
| 8 | 2.336886  | -2.970804 | 1.261125  |
| 8 | 3.587782  | -1.145864 | 0.784637  |
| 6 | 4.758455  | -1.773849 | 1.337622  |
| 1 | 5.590799  | -1.279276 | 0.837596  |
| 1 | 4.755222  | -2.831248 | 1.068522  |
| 6 | 4.825157  | -1.584953 | 2.840457  |
| 1 | 3.990537  | -2.086174 | 3.333725  |
| 1 | 5.755773  | -2.014382 | 3.219766  |
| 1 | 4.806024  | -0.523420 | 3.097398  |
| 1 | -2.050895 | -2.644130 | 0.440116  |
| 6 | -6.195562 | -1.044627 | -0.723870 |
| 7 | -7.345591 | -1.157207 | -0.828615 |
| 6 | 0.341617  | 2.080523  | -0.835975 |
| 6 | -0.023366 | 3.171232  | 0.191775  |
| 6 | 1.853788  | 1.729304  | -0.456244 |
| 1 | 0.164881  | 2.394051  | -1.866104 |
| 6 | 1.326910  | 3.917723  | 0.270075  |
| 6 | -0.128700 | 2.574866  | 1.606367  |
| 1 | -0.884655 | 3.772108  | -0.101012 |
| 6 | 2.133234  | 2.682102  | 0.724953  |
| 1 | 2.582268  | 1.832117  | -1.261461 |
| 1 | 1.328042  | 4.727014  | 1.004860  |
| 1 | 1.655054  | 4.314227  | -0.694863 |
| 1 | -0.549058 | 3.315351  | 2.290280  |
| 1 | -0.777215 | 1.696172  | 1.642017  |
| 6 | 1.347271  | 2.245577  | 1.973375  |
| 1 | 3.195966  | 2.842255  | 0.904575  |
| 1 | 1.675024  | 2.824970  | 2.839287  |
| 1 | 1.499067  | 1.189985  | 2.209666  |

## Optimised geometries (GS)

Mol-2g/A\_s0\_ac.out

\* SCF ENERGY / A.U. = -1136.46213679

|   |           |           |           |
|---|-----------|-----------|-----------|
| 6 | 1.442399  | 1.687565  | 0.656333  |
| 6 | 0.394019  | 2.630123  | 0.661044  |
| 6 | -0.749134 | 1.879677  | 0.594773  |
| 6 | -0.004504 | 4.062877  | 0.650969  |
| 6 | -1.950987 | 2.770284  | 0.516832  |
| 6 | -1.206513 | -0.589327 | 0.474741  |
| 6 | -2.507871 | -0.546175 | 0.970757  |
| 6 | -0.670557 | -1.746538 | -0.090825 |
| 6 | -3.297905 | -1.685375 | 0.888574  |
| 1 | -2.901982 | 0.358401  | 1.419211  |
| 6 | -1.458135 | -2.886587 | -0.161833 |
| 1 | 0.343185  | -1.749158 | -0.473218 |
| 6 | -2.770858 | -2.852817 | 0.325414  |
| 1 | -4.313173 | -1.673306 | 1.269533  |
| 1 | -1.061886 | -3.796409 | -0.599423 |
| 7 | -1.409076 | 4.048054  | 0.564181  |
| 7 | -0.391675 | 0.576156  | 0.552316  |
| 7 | 0.944484  | 0.454230  | 0.591268  |
| 8 | 0.651880  | 5.074055  | 0.698775  |
| 8 | -3.125994 | 2.497930  | 0.427123  |
| 6 | 2.906746  | 1.936672  | 0.721533  |
| 8 | 3.370213  | 3.053391  | 0.788835  |
| 8 | 3.615806  | 0.815773  | 0.696735  |
| 6 | 5.053545  | 0.971463  | 0.747471  |
| 1 | 5.309289  | 1.523445  | 1.655854  |
| 1 | 5.365098  | 1.560099  | -0.119839 |
| 6 | 5.657629  | -0.412584 | 0.738135  |
| 1 | 5.377673  | -0.955877 | -0.168472 |
| 1 | 6.747459  | -0.327349 | 0.766254  |
| 1 | 5.333814  | -0.986502 | 1.610558  |
| 6 | -2.200677 | 5.265273  | 0.535246  |
| 1 | -2.003930 | 5.858607  | 1.430351  |
| 1 | -1.959351 | 5.850758  | -0.354403 |
| 1 | -3.252125 | 4.979985  | 0.510241  |
| 6 | -3.587440 | -4.035095 | 0.248380  |
| 7 | -4.242737 | -4.987546 | 0.183946  |

Mol-2g/A\_s0\_dcm.out

\* SCF ENERGY / A.U. = -1136.46039615

|   |           |           |           |
|---|-----------|-----------|-----------|
| 6 | 1.442225  | 1.688357  | 0.639421  |
| 6 | 0.393939  | 2.630598  | 0.650521  |
| 6 | -0.749957 | 1.880706  | 0.589672  |
| 6 | -0.002962 | 4.063372  | 0.653120  |
| 6 | -1.951648 | 2.773124  | 0.530103  |
| 6 | -1.205961 | -0.590217 | 0.469953  |
| 6 | -2.516731 | -0.540102 | 0.939880  |
| 6 | -0.660329 | -1.756060 | -0.068408 |
| 6 | -3.305095 | -1.680620 | 0.860161  |
| 1 | -2.920711 | 0.372069  | 1.363446  |
| 6 | -1.447159 | -2.896783 | -0.137199 |
| 1 | 0.361092  | -1.764458 | -0.429379 |



|   |           |           |           |
|---|-----------|-----------|-----------|
| 6 | -2.769074 | -2.856537 | 0.323982  |
| 1 | -4.327573 | -1.662249 | 1.220789  |
| 1 | -1.043133 | -3.813173 | -0.553279 |
| 7 | -1.408419 | 4.050009  | 0.576560  |
| 7 | -0.392321 | 0.576520  | 0.544503  |
| 7 | 0.944143  | 0.455389  | 0.576420  |
| 8 | 0.653950  | 5.073626  | 0.705393  |
| 8 | -3.128272 | 2.502730  | 0.456177  |
| 6 | 2.906581  | 1.938403  | 0.695910  |
| 8 | 3.370380  | 3.055933  | 0.742064  |
| 8 | 3.614816  | 0.816788  | 0.689408  |
| 6 | 5.052110  | 0.972409  | 0.741078  |
| 1 | 5.305486  | 1.532573  | 1.645238  |
| 1 | 5.365549  | 1.553952  | -0.130278 |
| 6 | 5.653183  | -0.413077 | 0.745154  |
| 1 | 5.374538  | -0.962190 | -0.158311 |
| 1 | 6.743136  | -0.331782 | 0.777554  |
| 1 | 5.322569  | -0.978935 | 1.620216  |
| 6 | -2.198619 | 5.268327  | 0.555960  |
| 1 | -1.999372 | 5.856618  | 1.453825  |
| 1 | -1.956469 | 5.858443  | -0.330324 |
| 1 | -3.250259 | 4.983865  | 0.530005  |
| 6 | -3.584456 | -4.040015 | 0.249865  |
| 7 | -4.238452 | -4.993437 | 0.188170  |

Mol-2g/A\_s0\_diox.out

\* SCF ENERGY / A.U. = -1136.44598514

|   |           |           |           |
|---|-----------|-----------|-----------|
| 6 | 1.427152  | 1.695169  | 0.614838  |
| 6 | 0.383086  | 2.641747  | 0.649651  |
| 6 | -0.768370 | 1.899870  | 0.602485  |
| 6 | 0.006673  | 4.079699  | 0.692293  |
| 6 | -1.962985 | 2.810606  | 0.609257  |
| 6 | -1.214295 | -0.587457 | 0.463847  |
| 6 | -2.595913 | -0.498814 | 0.621265  |
| 6 | -0.583252 | -1.811736 | 0.233630  |
| 6 | -3.360522 | -1.655527 | 0.541829  |
| 1 | -3.077222 | 0.457214  | 0.794069  |
| 6 | -1.351982 | -2.963130 | 0.158729  |
| 1 | 0.492010  | -1.854209 | 0.116588  |
| 6 | -2.741469 | -2.887693 | 0.311829  |
| 1 | -4.436968 | -1.601859 | 0.661782  |
| 1 | -0.877745 | -3.921944 | -0.019969 |
| 7 | -1.404742 | 4.077883  | 0.664784  |
| 7 | -0.414470 | 0.589934  | 0.541351  |
| 7 | 0.922192  | 0.468048  | 0.551423  |
| 8 | 0.670936  | 5.081423  | 0.738903  |
| 8 | -3.146991 | 2.562832  | 0.577166  |
| 6 | 2.894920  | 1.937311  | 0.642169  |
| 8 | 3.367000  | 3.049142  | 0.661306  |
| 8 | 3.594067  | 0.806671  | 0.642130  |
| 6 | 5.029223  | 0.958338  | 0.667919  |
| 1 | 5.301443  | 1.528981  | 1.560287  |
| 1 | 5.332253  | 1.532673  | -0.212105 |
| 6 | 5.629470  | -0.427812 | 0.675665  |
| 1 | 5.337920  | -0.985340 | -0.218134 |
| 1 | 6.720077  | -0.350541 | 0.692960  |
| 1 | 5.309647  | -0.987193 | 1.558502  |

|   |           |           |           |
|---|-----------|-----------|-----------|
| 6 | -2.182987 | 5.302495  | 0.678099  |
| 1 | -1.853521 | 5.936409  | 1.502972  |
| 1 | -2.060816 | 5.842522  | -0.263703 |
| 1 | -3.230376 | 5.033631  | 0.813453  |
| 6 | -3.535042 | -4.085394 | 0.232764  |
| 7 | -4.171673 | -5.049775 | 0.167336  |

Mol-2g/A\_s0\_dmso.out

\* SCF ENERGY / A.U. = -1136.45801784

|   |           |           |           |
|---|-----------|-----------|-----------|
| 6 | 1.444891  | 1.692195  | 0.655115  |
| 6 | 0.395352  | 2.634014  | 0.660010  |
| 6 | -0.746489 | 1.881409  | 0.596834  |
| 6 | -0.008247 | 4.065725  | 0.644412  |
| 6 | -1.950650 | 2.766718  | 0.512999  |
| 6 | -1.203174 | -0.585921 | 0.477933  |
| 6 | -2.494085 | -0.551799 | 1.000965  |
| 6 | -0.677246 | -1.733062 | -0.116246 |
| 6 | -3.284658 | -1.690330 | 0.916154  |
| 1 | -2.878870 | 0.344455  | 1.473542  |
| 6 | -1.465017 | -2.872570 | -0.190617 |
| 1 | 0.328487  | -1.727952 | -0.519361 |
| 6 | -2.767615 | -2.847482 | 0.323361  |
| 1 | -4.292033 | -1.685921 | 1.317666  |
| 1 | -1.077399 | -3.774596 | -0.651374 |
| 7 | -1.412965 | 4.046234  | 0.558748  |
| 7 | -0.388091 | 0.579024  | 0.555686  |
| 7 | 0.947932  | 0.458045  | 0.592811  |
| 8 | 0.644653  | 5.079427  | 0.686085  |
| 8 | -3.123858 | 2.488445  | 0.418627  |
| 6 | 2.909856  | 1.938881  | 0.718499  |
| 8 | 3.377052  | 3.054472  | 0.777517  |
| 8 | 3.615181  | 0.815449  | 0.702854  |
| 6 | 5.053313  | 0.965948  | 0.755324  |
| 1 | 5.310187  | 1.520407  | 1.661811  |
| 1 | 5.369315  | 1.549409  | -0.113741 |
| 6 | 5.653061  | -0.419732 | 0.752726  |
| 1 | 5.373235  | -0.966467 | -0.151793 |
| 1 | 6.743030  | -0.337032 | 0.781654  |
| 1 | 5.327404  | -0.989220 | 1.627275  |
| 6 | -2.208171 | 5.260497  | 0.526571  |
| 1 | -1.980682 | 5.875432  | 1.399295  |
| 1 | -2.002109 | 5.825434  | -0.385089 |
| 1 | -3.259280 | 4.973715  | 0.547055  |
| 6 | -3.584803 | -4.028735 | 0.241608  |
| 7 | -4.240780 | -4.980343 | 0.172452  |

Mol-2g/A\_s0\_etoh.out

\* SCF ENERGY / A.U. = -1136.45846995

|   |           |           |           |
|---|-----------|-----------|-----------|
| 6 | 1.441294  | 1.662947  | 0.663445  |
| 6 | 0.395598  | 2.603200  | 0.670464  |
| 6 | -0.747580 | 1.856037  | 0.598998  |
| 6 | 0.004637  | 4.032425  | 0.661615  |
| 6 | -1.940685 | 2.753369  | 0.503613  |
| 6 | -1.214873 | -0.606526 | 0.476504  |
| 6 | -2.500492 | -0.561936 | 1.011310  |
| 6 | -0.703734 | -1.754356 | -0.127920 |

|   |           |           |           |
|---|-----------|-----------|-----------|
| 6 | -3.303269 | -1.691757 | 0.925596  |
| 1 | -2.869445 | 0.334960  | 1.496237  |
| 6 | -1.503460 | -2.885786 | -0.202016 |
| 1 | 0.299071  | -1.756781 | -0.538602 |
| 6 | -2.801806 | -2.850120 | 0.321770  |
| 1 | -4.307565 | -1.680435 | 1.334896  |
| 1 | -1.128762 | -3.789553 | -0.670326 |
| 7 | -1.394284 | 4.030498  | 0.563257  |
| 7 | -0.391130 | 0.553098  | 0.554356  |
| 7 | 0.944855  | 0.428727  | 0.595852  |
| 8 | 0.677088  | 5.037274  | 0.719716  |
| 8 | -3.115894 | 2.487216  | 0.391603  |
| 6 | 2.898360  | 1.931423  | 0.717737  |
| 8 | 3.339036  | 3.063057  | 0.756091  |
| 8 | 3.628019  | 0.828737  | 0.715376  |
| 6 | 5.066625  | 1.007141  | 0.754461  |
| 1 | 5.314769  | 1.573673  | 1.655732  |
| 1 | 5.358975  | 1.588344  | -0.124079 |
| 6 | 5.685646  | -0.369555 | 0.759077  |
| 1 | 5.407027  | -0.925814 | -0.140209 |
| 1 | 6.774494  | -0.271798 | 0.781217  |
| 1 | 5.371488  | -0.935473 | 1.640362  |
| 6 | -2.175576 | 5.255202  | 0.520461  |
| 1 | -1.967390 | 5.856837  | 1.407298  |
| 1 | -1.932108 | 5.825421  | -0.378493 |
| 1 | -3.230124 | 4.981211  | 0.505336  |
| 6 | -3.632097 | -4.021730 | 0.238448  |
| 7 | -4.299979 | -4.965002 | 0.168185  |

Mol-2g/A\_s0\_mecn.out

\* SCF ENERGY / A.U. = -1136.46121233

|   |           |           |           |
|---|-----------|-----------|-----------|
| 6 | 1.444468  | 1.692463  | 0.647974  |
| 6 | 0.394829  | 2.633771  | 0.654347  |
| 6 | -0.747118 | 1.881324  | 0.589881  |
| 6 | -0.008030 | 4.065389  | 0.647344  |
| 6 | -1.950956 | 2.768686  | 0.515410  |
| 6 | -1.203053 | -0.587099 | 0.472095  |
| 6 | -2.499312 | -0.546627 | 0.981618  |
| 6 | -0.671726 | -1.741169 | -0.103941 |
| 6 | -3.289562 | -1.685930 | 0.902119  |
| 1 | -2.888258 | 0.355667  | 1.439262  |
| 6 | -1.459224 | -2.881509 | -0.172152 |
| 1 | 0.337924  | -1.741217 | -0.497026 |
| 6 | -2.767020 | -2.850407 | 0.328439  |
| 1 | -4.300844 | -1.676597 | 1.293544  |
| 1 | -1.066989 | -3.789107 | -0.617806 |
| 7 | -1.411932 | 4.047776  | 0.562364  |
| 7 | -0.388341 | 0.578671  | 0.547044  |
| 7 | 0.947860  | 0.458345  | 0.583856  |
| 8 | 0.645756  | 5.078806  | 0.696636  |
| 8 | -3.125486 | 2.493347  | 0.427968  |
| 6 | 2.909092  | 1.939441  | 0.711995  |
| 8 | 3.376132  | 3.055432  | 0.772866  |
| 8 | 3.615294  | 0.817070  | 0.694930  |
| 6 | 5.053632  | 0.967784  | 0.750703  |
| 1 | 5.307167  | 1.520421  | 1.659282  |
| 1 | 5.370652  | 1.553053  | -0.116773 |

|   |           |           |           |
|---|-----------|-----------|-----------|
| 6 | 5.651096  | -0.419078 | 0.746666  |
| 1 | 5.371917  | -0.962244 | -0.160242 |
| 1 | 6.741120  | -0.339119 | 0.779279  |
| 1 | 5.320301  | -0.989259 | 1.618879  |
| 6 | -2.206221 | 5.263411  | 0.536532  |
| 1 | -2.042327 | 5.836923  | 1.451102  |
| 1 | -1.936710 | 5.868673  | -0.331272 |
| 1 | -3.255040 | 4.975466  | 0.469186  |
| 6 | -3.583543 | -4.032877 | 0.253934  |
| 7 | -4.238823 | -4.985505 | 0.191324  |

Mol-2g/B\_s0\_ac.out

\* SCF ENERGY / A.U. = -1136.46272244

|   |           |           |           |
|---|-----------|-----------|-----------|
| 6 | 1.372285  | 1.613531  | 0.515872  |
| 6 | 0.342676  | 2.568654  | 0.639327  |
| 6 | -0.810273 | 1.831592  | 0.679924  |
| 6 | -0.031689 | 3.999232  | 0.803665  |
| 6 | -1.992791 | 2.723188  | 0.893659  |
| 6 | -1.313833 | -0.625656 | 0.593303  |
| 6 | -2.610036 | -0.526470 | 0.092231  |
| 6 | -0.806609 | -1.822155 | 1.099355  |
| 6 | -3.426229 | -1.650076 | 0.110098  |
| 1 | -2.977745 | 0.409495  | -0.312463 |
| 6 | -1.620247 | -2.946151 | 1.106777  |
| 1 | 0.204420  | -1.867036 | 1.486842  |
| 6 | -2.928962 | -2.856316 | 0.616340  |
| 1 | -4.438242 | -1.595876 | -0.275869 |
| 1 | -1.248129 | -3.886547 | 1.498420  |
| 7 | -1.432503 | 3.993657  | 0.943067  |
| 7 | -0.475499 | 0.525728  | 0.587524  |
| 7 | 0.854980  | 0.386991  | 0.485835  |
| 8 | 0.639194  | 5.001744  | 0.829627  |
| 8 | -3.166431 | 2.454942  | 1.008745  |
| 6 | 2.846383  | 1.784672  | 0.414601  |
| 8 | 3.631611  | 0.868521  | 0.322873  |
| 8 | 3.168644  | 3.071388  | 0.438229  |
| 6 | 4.577493  | 3.382825  | 0.342541  |
| 1 | 4.965342  | 2.941386  | -0.579572 |
| 1 | 5.089114  | 2.923276  | 1.192910  |
| 6 | 4.706975  | 4.886931  | 0.349066  |
| 1 | 4.299859  | 5.309481  | 1.271509  |
| 1 | 5.764713  | 5.156248  | 0.282717  |
| 1 | 4.182853  | 5.327777  | -0.503113 |
| 6 | -2.200499 | 5.211122  | 1.135163  |
| 1 | -1.909409 | 5.696665  | 2.068987  |
| 1 | -2.032786 | 5.892690  | 0.299015  |
| 1 | -3.254797 | 4.938648  | 1.178237  |
| 6 | -3.771346 | -4.023011 | 0.629459  |
| 7 | -4.446867 | -4.963324 | 0.641285  |

Mol-2g/B\_s0\_dcm.out

\* SCF ENERGY / A.U. = -1136.46105211

|   |           |          |          |
|---|-----------|----------|----------|
| 6 | 1.374509  | 1.603990 | 0.509600 |
| 6 | 0.347588  | 2.561902 | 0.628191 |
| 6 | -0.808694 | 1.829594 | 0.663383 |
| 6 | -0.017900 | 3.994251 | 0.791133 |

|   |           |           |           |
|---|-----------|-----------|-----------|
| 6 | -1.987450 | 2.730375  | 0.864569  |
| 6 | -1.315407 | -0.629977 | 0.585631  |
| 6 | -2.629294 | -0.521965 | 0.134645  |
| 6 | -0.792312 | -1.836117 | 1.051830  |
| 6 | -3.445151 | -1.645685 | 0.160919  |
| 1 | -3.013378 | 0.422203  | -0.233853 |
| 6 | -1.607053 | -2.959161 | 1.068953  |
| 1 | 0.232831  | -1.889353 | 1.398495  |
| 6 | -2.932791 | -2.861168 | 0.628180  |
| 1 | -4.470543 | -1.583057 | -0.186397 |
| 1 | -1.222319 | -3.906626 | 1.429979  |
| 7 | -1.419055 | 3.996691  | 0.925833  |
| 7 | -0.476748 | 0.521517  | 0.573164  |
| 7 | 0.854114  | 0.379466  | 0.477455  |
| 8 | 0.658976  | 4.992535  | 0.819323  |
| 8 | -3.165259 | 2.472859  | 0.959904  |
| 6 | 2.848716  | 1.778202  | 0.418776  |
| 8 | 3.638119  | 0.865782  | 0.329705  |
| 8 | 3.164277  | 3.066601  | 0.449515  |
| 6 | 4.570809  | 3.388468  | 0.362053  |
| 1 | 4.966369  | 2.952869  | -0.559651 |
| 1 | 5.081367  | 2.928988  | 1.213153  |
| 6 | 4.685896  | 4.894015  | 0.374304  |
| 1 | 4.271566  | 5.308963  | 1.296837  |
| 1 | 5.740600  | 5.175260  | 0.310324  |
| 1 | 4.157180  | 5.331239  | -0.476816 |
| 6 | -2.181094 | 5.218749  | 1.113287  |
| 1 | -1.860677 | 5.722230  | 2.027594  |
| 1 | -2.038134 | 5.883853  | 0.259355  |
| 1 | -3.233349 | 4.947023  | 1.194343  |
| 6 | -3.775010 | -4.028035 | 0.651247  |
| 7 | -4.449681 | -4.968721 | 0.671219  |

Mol-2g/B\_s0\_diox.out

\* SCF ENERGY / A.U. = -1136.44715756

|   |           |           |          |
|---|-----------|-----------|----------|
| 6 | 1.351215  | 1.607244  | 0.575998 |
| 6 | 0.328218  | 2.574044  | 0.647361 |
| 6 | -0.838094 | 1.854202  | 0.679405 |
| 6 | -0.015483 | 4.020080  | 0.679886 |
| 6 | -2.011237 | 2.791068  | 0.731548 |
| 6 | -1.331864 | -0.628834 | 0.643091 |
| 6 | -2.713302 | -0.501462 | 0.773275 |
| 6 | -0.721915 | -1.879371 | 0.524146 |
| 6 | -3.499301 | -1.646448 | 0.783368 |
| 1 | -3.178211 | 0.473976  | 0.862182 |
| 6 | -1.512500 | -3.018397 | 0.536441 |
| 1 | 0.353513  | -1.951810 | 0.424738 |
| 6 | -2.901777 | -2.904802 | 0.666140 |
| 1 | -4.575802 | -1.562323 | 0.883937 |
| 1 | -1.055116 | -3.997396 | 0.444906 |
| 7 | -1.424179 | 4.048238  | 0.738074 |
| 7 | -0.509902 | 0.536401  | 0.632425 |
| 7 | 0.822109  | 0.389829  | 0.570948 |
| 8 | 0.672209  | 5.008237  | 0.662063 |
| 8 | -3.200711 | 2.571910  | 0.760189 |
| 6 | 2.830440  | 1.764567  | 0.514750 |
| 8 | 3.610263  | 0.848044  | 0.422446 |

|   |           |           |           |
|---|-----------|-----------|-----------|
| 8 | 3.155679  | 3.052087  | 0.574601  |
| 6 | 4.563821  | 3.358804  | 0.515756  |
| 1 | 4.974560  | 2.924679  | -0.400254 |
| 1 | 5.056010  | 2.884882  | 1.370174  |
| 6 | 4.695849  | 4.862758  | 0.543135  |
| 1 | 4.262017  | 5.275445  | 1.457264  |
| 1 | 5.754144  | 5.135551  | 0.506625  |
| 1 | 4.190097  | 5.313827  | -0.314129 |
| 6 | -2.177623 | 5.288092  | 0.768929  |
| 1 | -1.826883 | 5.912578  | 1.592426  |
| 1 | -2.058363 | 5.829526  | -0.172253 |
| 1 | -3.227805 | 5.037964  | 0.917715  |
| 6 | -3.717174 | -4.090317 | 0.679049  |
| 7 | -4.371286 | -5.045110 | 0.689830  |

Mol-2g/B\_s0\_dmso.out

\* SCF ENERGY / A.U. = -1136.45855212

|   |           |           |           |
|---|-----------|-----------|-----------|
| 6 | 1.370147  | 1.615007  | 0.512502  |
| 6 | 0.340511  | 2.570107  | 0.636044  |
| 6 | -0.812056 | 1.832824  | 0.680684  |
| 6 | -0.034396 | 4.001088  | 0.795854  |
| 6 | -1.994738 | 2.724476  | 0.895054  |
| 6 | -1.314814 | -0.624700 | 0.596322  |
| 6 | -2.610302 | -0.527251 | 0.093103  |
| 6 | -0.806838 | -1.820357 | 1.103317  |
| 6 | -3.424830 | -1.651867 | 0.110012  |
| 1 | -2.978553 | 0.407541  | -0.313632 |
| 6 | -1.618575 | -2.945484 | 1.109690  |
| 1 | 0.203282  | -1.863987 | 1.493234  |
| 6 | -2.926350 | -2.857234 | 0.616799  |
| 1 | -4.436242 | -1.599302 | -0.277701 |
| 1 | -1.245650 | -3.885140 | 1.502256  |
| 7 | -1.434760 | 3.995104  | 0.938691  |
| 7 | -0.477264 | 0.526994  | 0.590086  |
| 7 | 0.852954  | 0.388298  | 0.486014  |
| 8 | 0.635949  | 5.004062  | 0.815292  |
| 8 | -3.168033 | 2.456396  | 1.014746  |
| 6 | 2.844101  | 1.785653  | 0.408417  |
| 8 | 3.628865  | 0.869819  | 0.310083  |
| 8 | 3.167549  | 3.071947  | 0.438157  |
| 6 | 4.576748  | 3.380986  | 0.340600  |
| 1 | 4.961453  | 2.944511  | -0.585112 |
| 1 | 5.090095  | 2.915451  | 1.186589  |
| 6 | 4.711178  | 4.884172  | 0.355565  |
| 1 | 4.308255  | 5.303441  | 1.281323  |
| 1 | 5.769820  | 5.149668  | 0.288757  |
| 1 | 4.187857  | 5.332544  | -0.493136 |
| 6 | -2.201938 | 5.211941  | 1.135579  |
| 1 | -1.918475 | 5.688798  | 2.076264  |
| 1 | -2.026438 | 5.900171  | 0.306667  |
| 1 | -3.257140 | 4.941723  | 1.167497  |
| 6 | -3.767345 | -4.024512 | 0.629444  |
| 7 | -4.442409 | -4.965128 | 0.641124  |

Mol-2g/B\_s0\_etoh.out

\* SCF ENERGY / A.U. = -1136.45909613

|   |           |           |           |
|---|-----------|-----------|-----------|
| 6 | 1.383554  | 1.594009  | 0.526591  |
| 6 | 0.357535  | 2.549223  | 0.647860  |
| 6 | -0.796944 | 1.816459  | 0.684127  |
| 6 | -0.009200 | 3.976206  | 0.819884  |
| 6 | -1.971636 | 2.715248  | 0.898857  |
| 6 | -1.311385 | -0.636270 | 0.590514  |
| 6 | -2.597764 | -0.531479 | 0.066151  |
| 6 | -0.820307 | -1.830554 | 1.115967  |
| 6 | -3.422233 | -1.648944 | 0.082461  |
| 1 | -2.951286 | 0.400934  | -0.359730 |
| 6 | -1.642116 | -2.948601 | 1.121250  |
| 1 | 0.183706  | -1.878510 | 1.521333  |
| 6 | -2.941768 | -2.853092 | 0.609073  |
| 1 | -4.427385 | -1.592094 | -0.320884 |
| 1 | -1.283802 | -3.887960 | 1.528178  |
| 7 | -1.405068 | 3.983537  | 0.956425  |
| 7 | -0.465542 | 0.510404  | 0.589274  |
| 7 | 0.864950  | 0.368027  | 0.491030  |
| 8 | 0.676149  | 4.973571  | 0.853414  |
| 8 | -3.148230 | 2.454443  | 1.009294  |
| 6 | 2.852704  | 1.778766  | 0.430303  |
| 8 | 3.650104  | 0.867475  | 0.353919  |
| 8 | 3.161270  | 3.066140  | 0.436718  |
| 6 | 4.566196  | 3.404578  | 0.335875  |
| 1 | 4.956638  | 2.963958  | -0.585231 |
| 1 | 5.084575  | 2.962372  | 1.190901  |
| 6 | 4.656179  | 4.911229  | 0.330106  |
| 1 | 4.245932  | 5.329998  | 1.253076  |
| 1 | 5.705579  | 5.208138  | 0.252194  |
| 1 | 4.112645  | 5.329353  | -0.521634 |
| 6 | -2.162627 | 5.209294  | 1.145420  |
| 1 | -1.856837 | 5.697763  | 2.072839  |
| 1 | -1.995843 | 5.881193  | 0.301249  |
| 1 | -3.218762 | 4.946805  | 1.200709  |
| 6 | -3.794866 | -4.011161 | 0.623058  |
| 7 | -4.482497 | -4.942695 | 0.635613  |

Mol-2g/B\_s0\_mecn.out

\* SCF ENERGY / A.U. = -1136.46176523

|   |           |           |           |
|---|-----------|-----------|-----------|
| 6 | 1.373151  | 1.612552  | 0.510437  |
| 6 | 0.343639  | 2.567468  | 0.633795  |
| 6 | -0.809070 | 1.830219  | 0.675433  |
| 6 | -0.031061 | 3.997850  | 0.797084  |
| 6 | -1.991080 | 2.721909  | 0.890593  |
| 6 | -1.313299 | -0.626435 | 0.591182  |
| 6 | -2.610599 | -0.526038 | 0.093050  |
| 6 | -0.805921 | -1.823013 | 1.096905  |
| 6 | -3.427872 | -1.648866 | 0.113553  |
| 1 | -2.977988 | 0.410081  | -0.311570 |
| 6 | -1.620578 | -2.946299 | 1.106898  |
| 1 | 0.205629  | -1.868644 | 1.482848  |
| 6 | -2.930359 | -2.855219 | 0.619465  |
| 1 | -4.440709 | -1.594059 | -0.270069 |
| 1 | -1.248605 | -3.886762 | 1.498419  |

|   |           |           |           |
|---|-----------|-----------|-----------|
| 7 | -1.430912 | 3.992484  | 0.938852  |
| 7 | -0.474350 | 0.524489  | 0.583308  |
| 7 | 0.856106  | 0.385812  | 0.480780  |
| 8 | 0.640053  | 5.000818  | 0.820279  |
| 8 | -3.164631 | 2.454010  | 1.007811  |
| 6 | 2.846958  | 1.784560  | 0.410740  |
| 8 | 3.632761  | 0.868750  | 0.315633  |
| 8 | 3.169157  | 3.070745  | 0.440507  |
| 6 | 4.577792  | 3.384315  | 0.343925  |
| 1 | 4.963741  | 2.949219  | -0.581948 |
| 1 | 5.091127  | 2.920395  | 1.190741  |
| 6 | 4.704382  | 4.888615  | 0.358602  |
| 1 | 4.301570  | 5.305229  | 1.285633  |
| 1 | 5.761144  | 5.160318  | 0.288042  |
| 1 | 4.174934  | 5.332395  | -0.488766 |
| 6 | -2.198621 | 5.209837  | 1.133784  |
| 1 | -1.900047 | 5.697442  | 2.064089  |
| 1 | -2.038728 | 5.889312  | 0.294464  |
| 1 | -3.252096 | 4.936060  | 1.186246  |
| 6 | -3.773790 | -4.021052 | 0.635509  |
| 7 | -4.450209 | -4.960733 | 0.649932  |



## Optimised geometries (ES) – B rotamers

Mol-2g/B\_slr\_ac.out

\* SCF ENERGY / A.U. = -1136.50322484

|   |           |           |           |
|---|-----------|-----------|-----------|
| 6 | 1.391696  | 1.734676  | 0.570739  |
| 6 | 0.327177  | 2.684356  | 0.590999  |
| 6 | -0.862469 | 1.871350  | 0.606671  |
| 6 | -0.006343 | 4.062769  | 0.585652  |
| 6 | -2.031646 | 2.665752  | 0.612836  |
| 6 | -1.188310 | -0.630830 | 0.610207  |
| 6 | -2.583224 | -0.588852 | 0.657957  |
| 6 | -0.501869 | -1.848648 | 0.574754  |
| 6 | -3.295984 | -1.778139 | 0.669683  |
| 1 | -3.111938 | 0.358492  | 0.683838  |
| 6 | -1.220515 | -3.033001 | 0.587201  |
| 1 | 0.578935  | -1.865105 | 0.537936  |
| 6 | -2.619641 | -3.003120 | 0.634832  |
| 1 | -4.378992 | -1.754443 | 0.706760  |
| 1 | -0.695202 | -3.980722 | 0.559607  |
| 7 | -1.454124 | 4.004072  | 0.609232  |
| 7 | -0.450043 | 0.574525  | 0.597371  |
| 7 | 0.916290  | 0.511391  | 0.577147  |
| 8 | 0.603132  | 5.131473  | 0.560212  |
| 8 | -3.250271 | 2.483639  | 0.616980  |
| 6 | 2.869833  | 1.926730  | 0.550231  |
| 8 | 3.665233  | 1.012723  | 0.519530  |
| 8 | 3.173560  | 3.213853  | 0.570884  |
| 6 | 4.581583  | 3.553737  | 0.554994  |
| 1 | 5.023509  | 3.130124  | -0.350296 |
| 1 | 5.053520  | 3.089543  | 1.424507  |
| 6 | 4.686895  | 5.060700  | 0.587661  |
| 1 | 4.228972  | 5.465800  | 1.493461  |
| 1 | 5.742646  | 5.344190  | 0.577819  |
| 1 | 4.201430  | 5.506426  | -0.284028 |
| 6 | -2.269076 | 5.168693  | 0.572179  |
| 1 | -1.696331 | 6.013944  | 0.953458  |
| 1 | -2.548541 | 5.375017  | -0.472898 |
| 1 | -3.188141 | 4.982425  | 1.130928  |
| 6 | -3.362042 | -4.231650 | 0.648401  |
| 7 | -3.961601 | -5.224886 | 0.659511  |

Mol-2g/B\_slr\_dcm.out

\* SCF ENERGY / A.U. = -1136.50110550

|   |           |           |          |
|---|-----------|-----------|----------|
| 6 | 1.394969  | 1.730134  | 0.572340 |
| 6 | 0.331666  | 2.681190  | 0.592199 |
| 6 | -0.859085 | 1.869621  | 0.607014 |
| 6 | 0.001085  | 4.060475  | 0.587707 |
| 6 | -2.027777 | 2.664444  | 0.613446 |
| 6 | -1.187998 | -0.632312 | 0.609923 |
| 6 | -2.582890 | -0.588419 | 0.655753 |
| 6 | -0.503089 | -1.851001 | 0.575834 |
| 6 | -3.297075 | -1.776953 | 0.666888 |
| 1 | -3.110663 | 0.359574  | 0.680564 |
| 6 | -1.223499 | -3.034325 | 0.587669 |
| 1 | 0.577829  | -1.868174 | 0.540613 |

|   |           |           |           |
|---|-----------|-----------|-----------|
| 6 | -2.622637 | -3.002904 | 0.633364  |
| 1 | -4.380131 | -1.751936 | 0.702441  |
| 1 | -0.699682 | -3.982947 | 0.561167  |
| 7 | -1.448198 | 4.003038  | 0.610610  |
| 7 | -0.447904 | 0.572024  | 0.597677  |
| 7 | 0.918308  | 0.507254  | 0.578371  |
| 8 | 0.610453  | 5.128263  | 0.563279  |
| 8 | -3.246328 | 2.484444  | 0.617656  |
| 6 | 2.873173  | 1.923135  | 0.552889  |
| 8 | 3.670360  | 1.011235  | 0.524790  |
| 8 | 3.172802  | 3.211653  | 0.571223  |
| 6 | 4.578549  | 3.557369  | 0.555852  |
| 1 | 5.024077  | 3.132193  | -0.347061 |
| 1 | 5.051920  | 3.098282  | 1.427436  |
| 6 | 4.675618  | 5.065107  | 0.583065  |
| 1 | 4.213170  | 5.470696  | 1.486265  |
| 1 | 5.729639  | 5.355220  | 0.573416  |
| 1 | 4.187515  | 5.504473  | -0.290295 |
| 6 | -2.261433 | 5.168424  | 0.574320  |
| 1 | -1.685167 | 6.013587  | 0.950689  |
| 1 | -2.545717 | 5.372905  | -0.469941 |
| 1 | -3.178981 | 4.984458  | 1.136657  |
| 6 | -3.366851 | -4.230489 | 0.646286  |
| 7 | -3.967920 | -5.222734 | 0.656849  |

Mol-2g/B\_slr\_diox.out

\* SCF ENERGY / A.U. = -1136.49210729

|   |           |           |           |
|---|-----------|-----------|-----------|
| 6 | 1.405668  | 1.714354  | 0.572057  |
| 6 | 0.346785  | 2.670166  | 0.593437  |
| 6 | -0.847872 | 1.863650  | 0.608332  |
| 6 | 0.027773  | 4.052357  | 0.590877  |
| 6 | -2.015088 | 2.659311  | 0.617267  |
| 6 | -1.187254 | -0.637495 | 0.609975  |
| 6 | -2.582075 | -0.587400 | 0.648995  |
| 6 | -0.507472 | -1.859129 | 0.582185  |
| 6 | -3.300616 | -1.773706 | 0.659521  |
| 1 | -3.107002 | 0.362677  | 0.669122  |
| 6 | -1.233764 | -3.038971 | 0.593345  |
| 1 | 0.573885  | -1.878222 | 0.552491  |
| 6 | -2.632903 | -3.003020 | 0.632120  |
| 1 | -4.383848 | -1.744664 | 0.689656  |
| 1 | -0.715231 | -3.990766 | 0.571871  |
| 7 | -1.427596 | 3.999572  | 0.614442  |
| 7 | -0.440896 | 0.563266  | 0.598118  |
| 7 | 0.924734  | 0.492909  | 0.578285  |
| 8 | 0.635789  | 5.117097  | 0.566440  |
| 8 | -3.233091 | 2.487641  | 0.624347  |
| 6 | 2.883753  | 1.911857  | 0.551781  |
| 8 | 3.688012  | 1.009074  | 0.522304  |
| 8 | 3.167899  | 3.206104  | 0.571050  |
| 6 | 4.565672  | 3.570373  | 0.554006  |
| 1 | 5.018171  | 3.150387  | -0.348397 |
| 1 | 5.048608  | 3.117094  | 1.423935  |
| 6 | 4.637416  | 5.079989  | 0.580939  |
| 1 | 4.165736  | 5.476518  | 1.483125  |
| 1 | 5.685669  | 5.391138  | 0.569200  |
| 1 | 4.135810  | 5.509497  | -0.289380 |

|   |           |           |           |
|---|-----------|-----------|-----------|
| 6 | -2.233844 | 5.167728  | 0.577320  |
| 1 | -1.649472 | 6.010412  | 0.948370  |
| 1 | -2.520301 | 5.373167  | -0.466808 |
| 1 | -3.153466 | 4.988406  | 1.138812  |
| 6 | -3.382866 | -4.227654 | 0.644068  |
| 7 | -3.988617 | -5.216714 | 0.653748  |

Mol-2g/B\_slr\_dms0.out

\* SCF ENERGY / A.U. = -1136.50420646

|   |           |           |           |
|---|-----------|-----------|-----------|
| 6 | 1.390086  | 1.736867  | 0.569404  |
| 6 | 0.324982  | 2.685863  | 0.590084  |
| 6 | -0.864125 | 1.872167  | 0.606414  |
| 6 | -0.009904 | 4.063844  | 0.584298  |
| 6 | -2.033536 | 2.666361  | 0.612640  |
| 6 | -1.188466 | -0.630127 | 0.610344  |
| 6 | -2.583392 | -0.589075 | 0.658975  |
| 6 | -0.501285 | -1.847529 | 0.574424  |
| 6 | -3.295452 | -1.778730 | 0.671135  |
| 1 | -3.112568 | 0.357956  | 0.685244  |
| 6 | -1.219078 | -3.032377 | 0.587313  |
| 1 | 0.579467  | -1.863637 | 0.536869  |
| 6 | -2.618197 | -3.003251 | 0.635831  |
| 1 | -4.378438 | -1.755679 | 0.708912  |
| 1 | -0.693050 | -3.979670 | 0.559344  |
| 7 | -1.456979 | 4.004566  | 0.608478  |
| 7 | -0.451086 | 0.575716  | 0.597066  |
| 7 | 0.915302  | 0.513383  | 0.576100  |
| 8 | 0.599630  | 5.132973  | 0.558144  |
| 8 | -3.252189 | 2.483267  | 0.616999  |
| 6 | 2.868167  | 1.928552  | 0.548083  |
| 8 | 3.662745  | 1.013614  | 0.515415  |
| 8 | 3.173818  | 3.215030  | 0.570494  |
| 6 | 4.582948  | 3.552034  | 0.554263  |
| 1 | 5.022863  | 3.129951  | -0.352661 |
| 1 | 5.054395  | 3.084570  | 1.422219  |
| 6 | 4.692422  | 5.058560  | 0.590884  |
| 1 | 4.236866  | 5.462648  | 1.498366  |
| 1 | 5.749026  | 5.338725  | 0.581043  |
| 1 | 4.208193  | 5.508207  | -0.279519 |
| 6 | -2.272735 | 5.168820  | 0.571004  |
| 1 | -1.701710 | 6.014104  | 0.954688  |
| 1 | -2.549789 | 5.376053  | -0.474483 |
| 1 | -3.192572 | 4.981443  | 1.127943  |
| 6 | -3.359715 | -4.232239 | 0.649854  |
| 7 | -3.958539 | -5.225954 | 0.661340  |

Mol-2g/B\_slr\_etoh.out

\* SCF ENERGY / A.U. = -1136.50352676

|   |           |           |          |
|---|-----------|-----------|----------|
| 6 | 1.391209  | 1.735342  | 0.570375 |
| 6 | 0.326512  | 2.684815  | 0.590746 |
| 6 | -0.862971 | 1.871599  | 0.606600 |
| 6 | -0.007426 | 4.063097  | 0.585264 |
| 6 | -2.032219 | 2.665939  | 0.612770 |
| 6 | -1.188357 | -0.630616 | 0.610249 |
| 6 | -2.583275 | -0.588919 | 0.658276 |
| 6 | -0.501692 | -1.848307 | 0.574635 |

|   |           |           |           |
|---|-----------|-----------|-----------|
| 6 | -3.295823 | -1.778318 | 0.670122  |
| 1 | -3.112129 | 0.358330  | 0.684288  |
| 6 | -1.220079 | -3.032811 | 0.587206  |
| 1 | 0.579096  | -1.864658 | 0.537587  |
| 6 | -2.619202 | -3.003159 | 0.635115  |
| 1 | -4.378824 | -1.754817 | 0.707418  |
| 1 | -0.694548 | -3.980401 | 0.559482  |
| 7 | -1.454992 | 4.004223  | 0.609007  |
| 7 | -0.450360 | 0.574888  | 0.597291  |
| 7 | 0.915990  | 0.511996  | 0.576864  |
| 8 | 0.602068  | 5.131931  | 0.559622  |
| 8 | -3.250852 | 2.483526  | 0.616961  |
| 6 | 2.869330  | 1.927279  | 0.549643  |
| 8 | 3.664478  | 1.012983  | 0.518395  |
| 8 | 3.173644  | 3.214204  | 0.570785  |
| 6 | 4.582004  | 3.553216  | 0.554799  |
| 1 | 5.023338  | 3.130010  | -0.350952 |
| 1 | 5.053776  | 3.088088  | 1.423881  |
| 6 | 4.688569  | 5.060051  | 0.588570  |
| 1 | 4.231353  | 5.464903  | 1.494850  |
| 1 | 5.744579  | 5.342538  | 0.578721  |
| 1 | 4.203483  | 5.506907  | -0.282764 |
| 6 | -2.270189 | 5.168732  | 0.571826  |
| 1 | -1.697966 | 6.013994  | 0.953833  |
| 1 | -2.548925 | 5.375329  | -0.473376 |
| 1 | -3.189487 | 4.982128  | 1.130029  |
| 6 | -3.361335 | -4.231827 | 0.648811  |
| 7 | -3.960670 | -5.225210 | 0.660026  |

Mol-2g/B\_slr\_mecn.out

\* SCF ENERGY / A.U. = -1136.50396437

|   |           |           |           |
|---|-----------|-----------|-----------|
| 6 | 1.390490  | 1.736319  | 0.569799  |
| 6 | 0.325533  | 2.685487  | 0.590353  |
| 6 | -0.863710 | 1.871963  | 0.606495  |
| 6 | -0.009015 | 4.063576  | 0.584673  |
| 6 | -2.033062 | 2.666210  | 0.612684  |
| 6 | -1.188427 | -0.630303 | 0.610316  |
| 6 | -2.583350 | -0.589019 | 0.658733  |
| 6 | -0.501431 | -1.847808 | 0.574489  |
| 6 | -3.295585 | -1.778582 | 0.670765  |
| 1 | -3.112410 | 0.358090  | 0.684921  |
| 6 | -1.219438 | -3.032532 | 0.587250  |
| 1 | 0.579333  | -1.864003 | 0.537114  |
| 6 | -2.618559 | -3.003217 | 0.635551  |
| 1 | -4.378577 | -1.755369 | 0.708372  |
| 1 | -0.693588 | -3.979932 | 0.559355  |
| 7 | -1.456265 | 4.004443  | 0.608677  |
| 7 | -0.450825 | 0.575419  | 0.597166  |
| 7 | 0.915549  | 0.512884  | 0.576414  |
| 8 | 0.600506  | 5.132599  | 0.558715  |
| 8 | -3.251708 | 2.483359  | 0.616963  |
| 6 | 2.868586  | 1.928092  | 0.548708  |
| 8 | 3.663369  | 1.013381  | 0.516599  |
| 8 | 3.173758  | 3.214730  | 0.570614  |
| 6 | 4.582612  | 3.552457  | 0.554473  |
| 1 | 5.023051  | 3.129915  | -0.351996 |
| 1 | 5.054162  | 3.085887  | 1.422872  |

|   |           |           |           |
|---|-----------|-----------|-----------|
| 6 | 4.691035  | 5.059098  | 0.589978  |
| 1 | 4.234873  | 5.463516  | 1.497000  |
| 1 | 5.747425  | 5.340100  | 0.580127  |
| 1 | 4.206503  | 5.507685  | -0.280793 |
| 6 | -2.271821 | 5.168789  | 0.571305  |
| 1 | -1.700372 | 6.014062  | 0.954404  |
| 1 | -2.549461 | 5.375803  | -0.474083 |
| 1 | -3.191473 | 4.981684  | 1.128682  |
| 6 | -3.360297 | -4.232090 | 0.649442  |
| 7 | -3.959305 | -5.225686 | 0.660819  |
